# Supplementary material for: Bayesian Estimation of the Variation in Strength and Aerobic Physical Performances in Young Eumenorrheic Female College Students during a Menstrual Cycle
Source: MDPI journal article supplement (doi:10.3390/sports9090130), 2021-09-17

Group 1 = Test day 2

S1: Results and diagnostics

Body mass comparison

Group 2: Test day 8

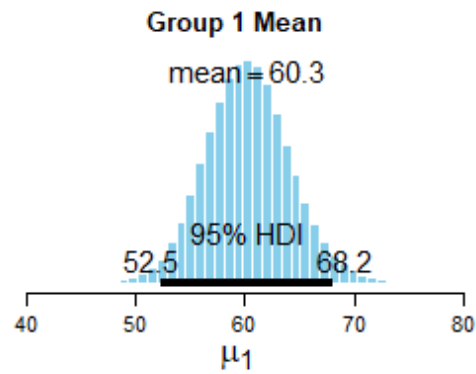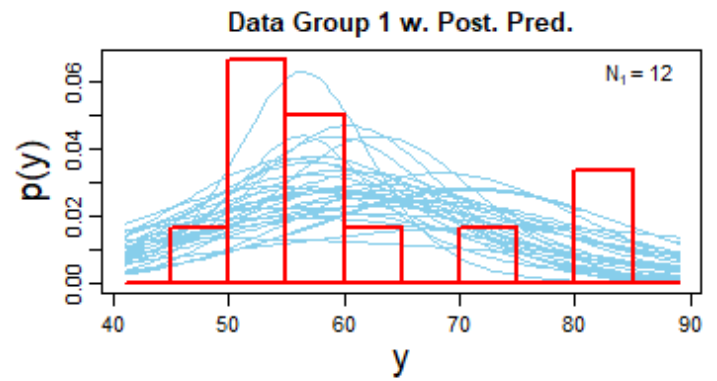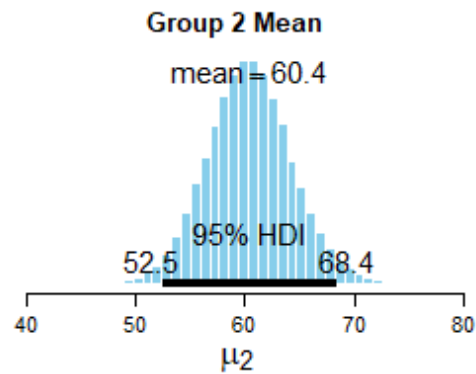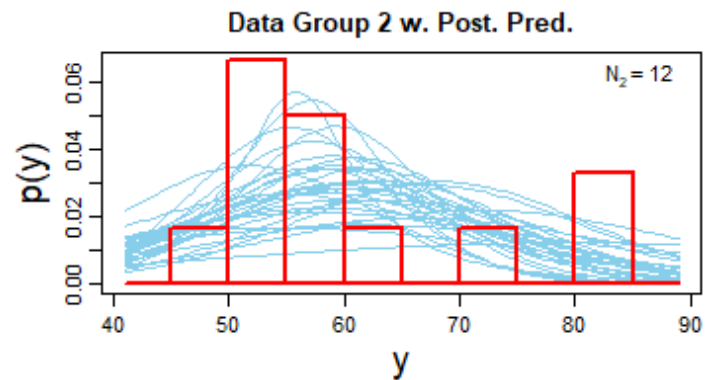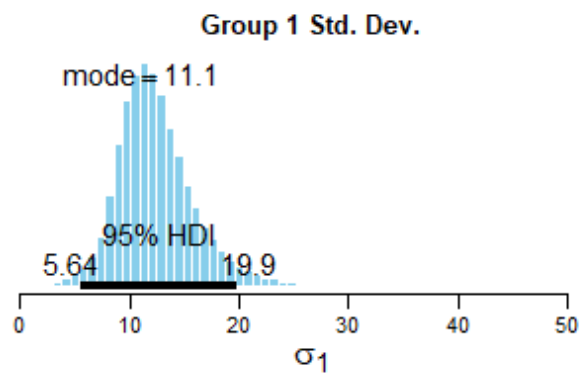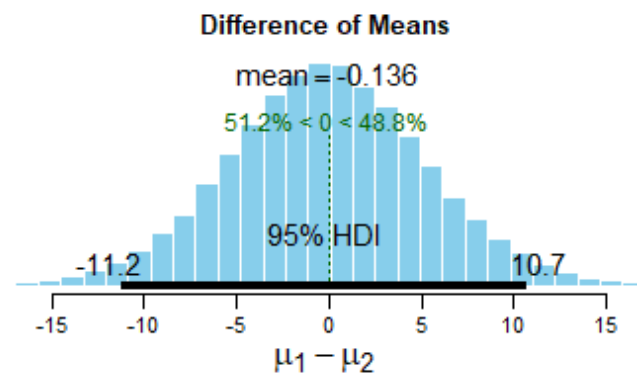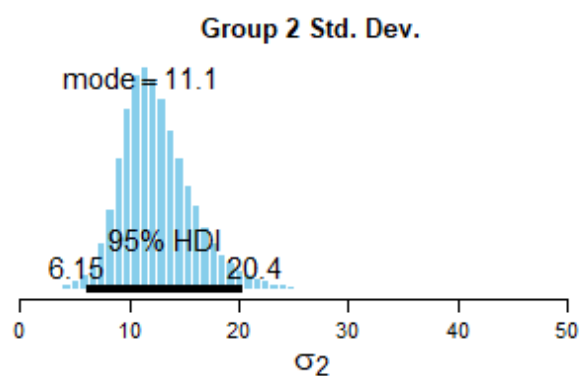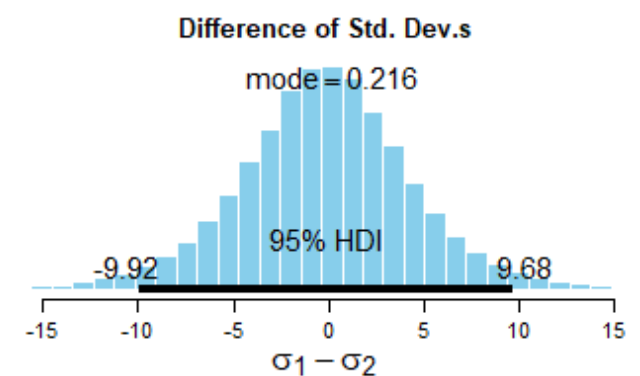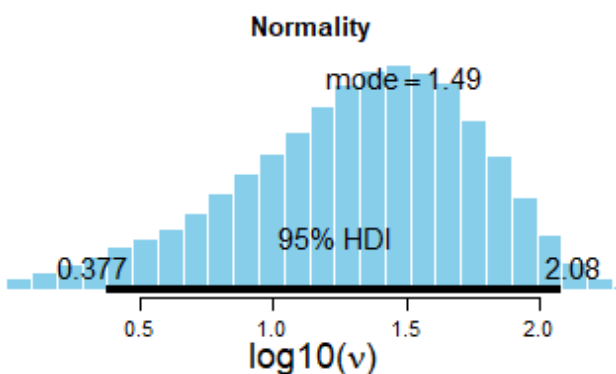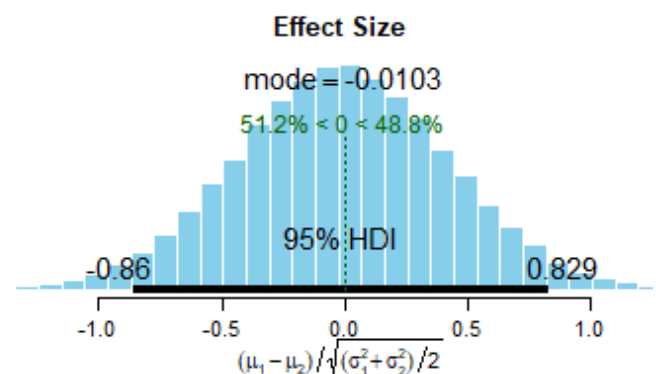

Group 1 = Test day 2

Body mass comparison

Group 2: Test day 21

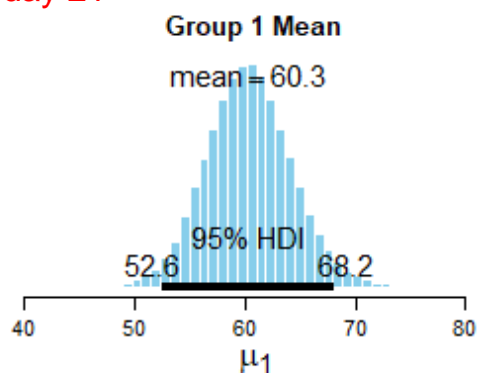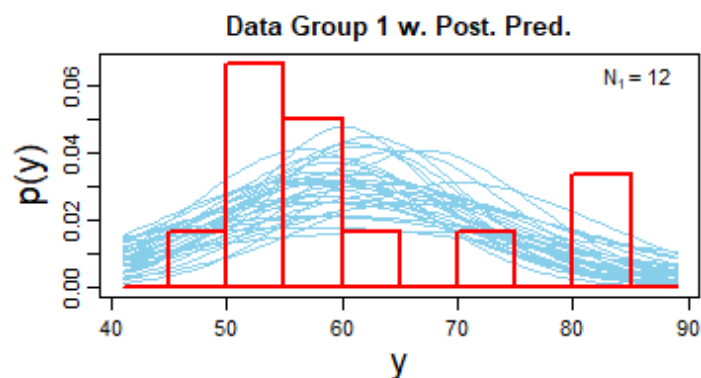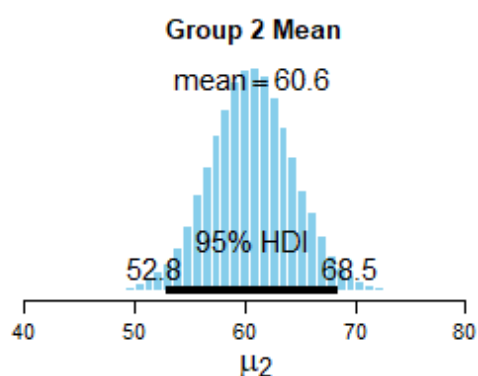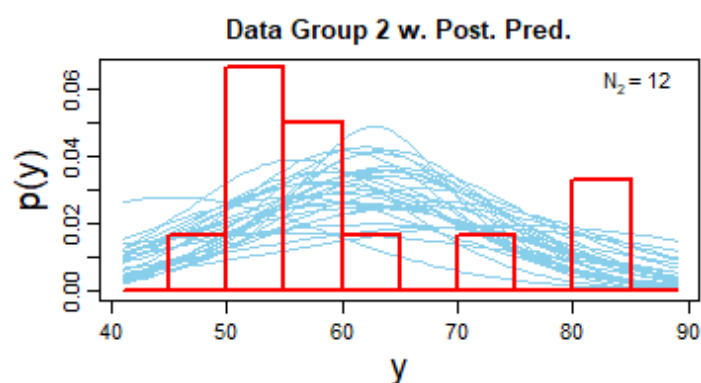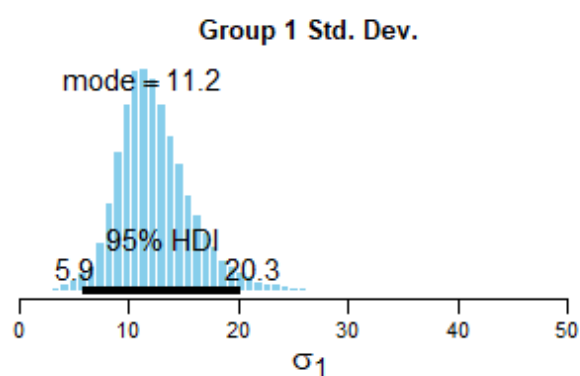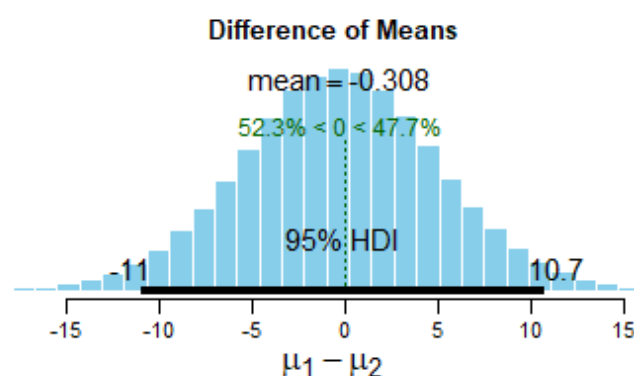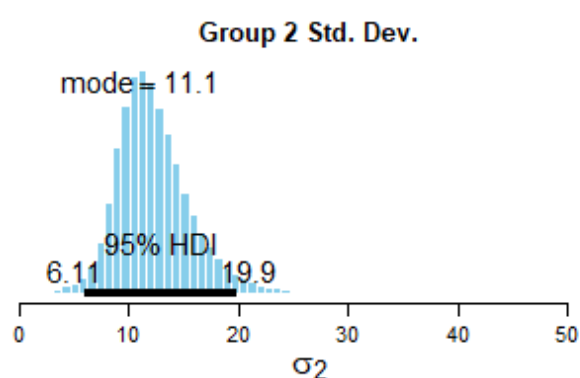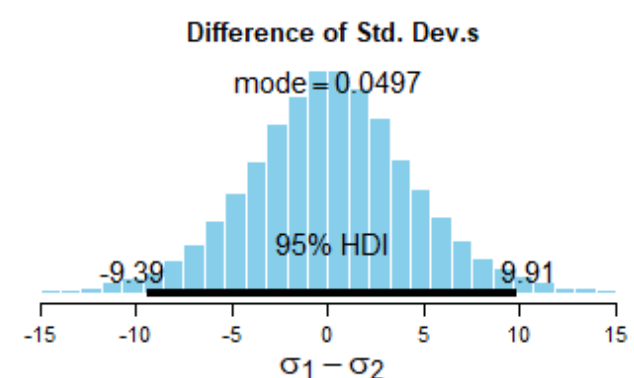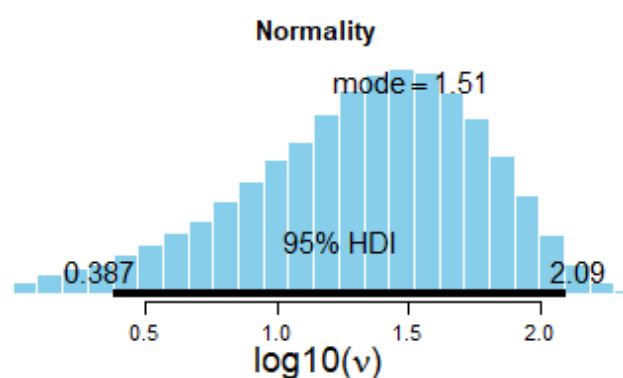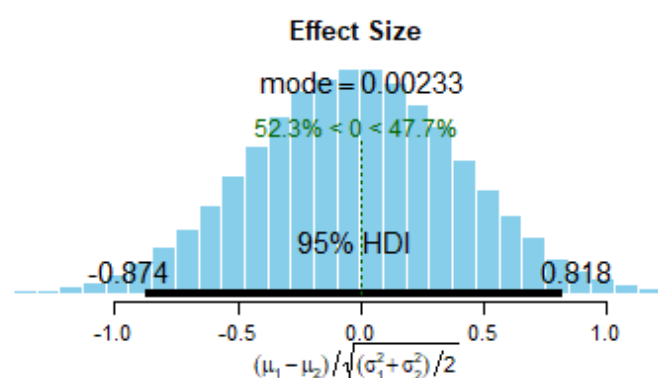

Group 1 = Test day 2

Body mass comparison

Group 2: Test day 14

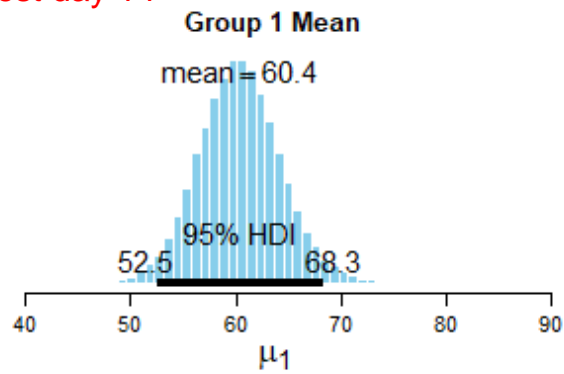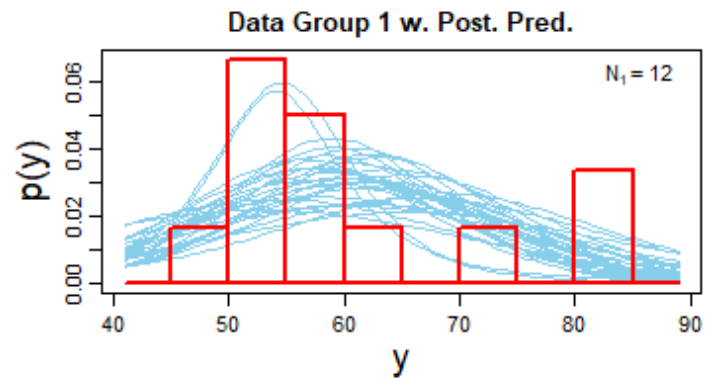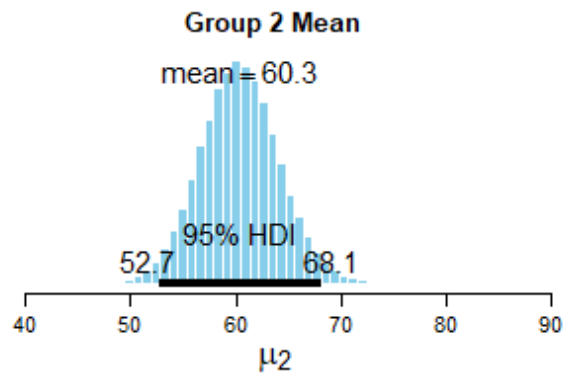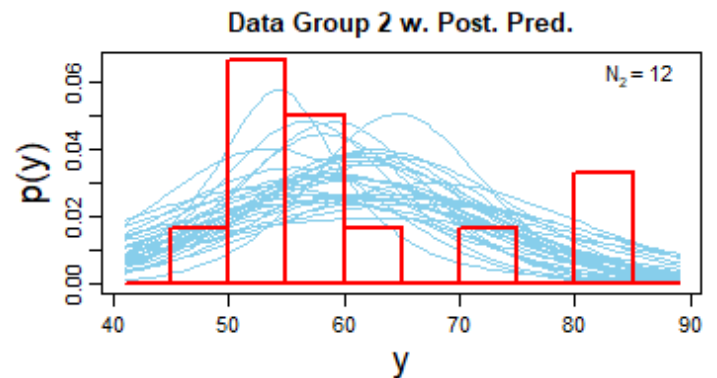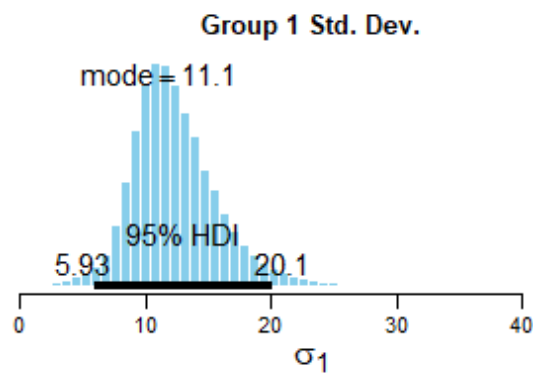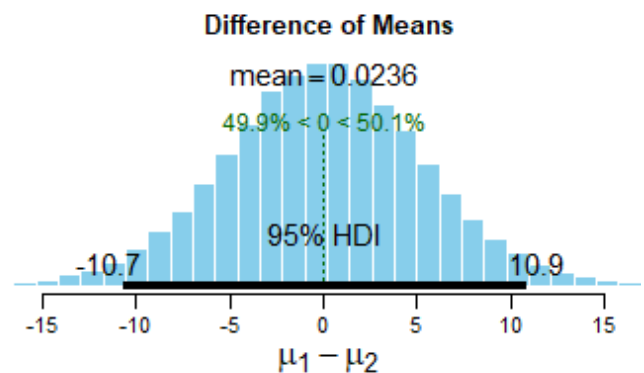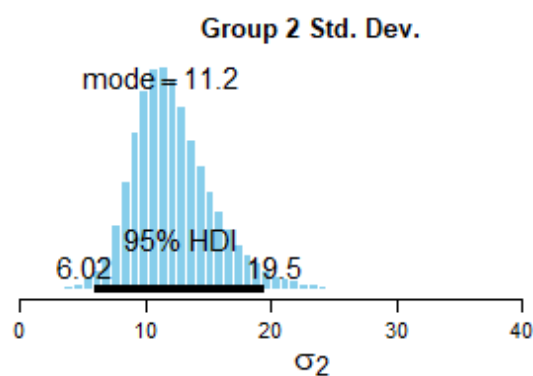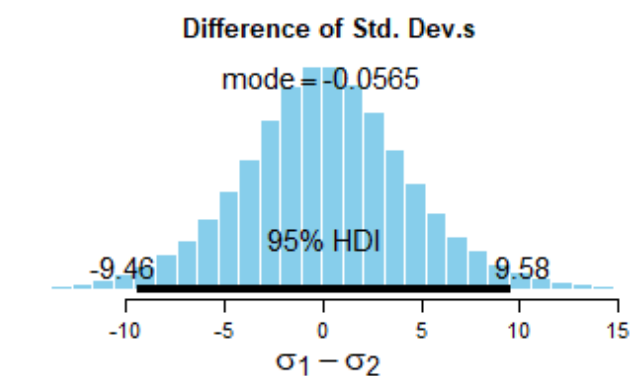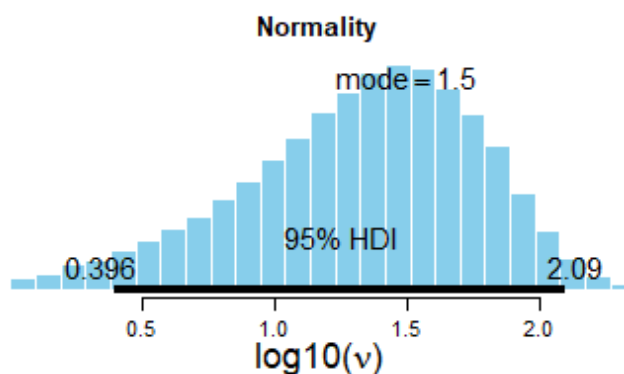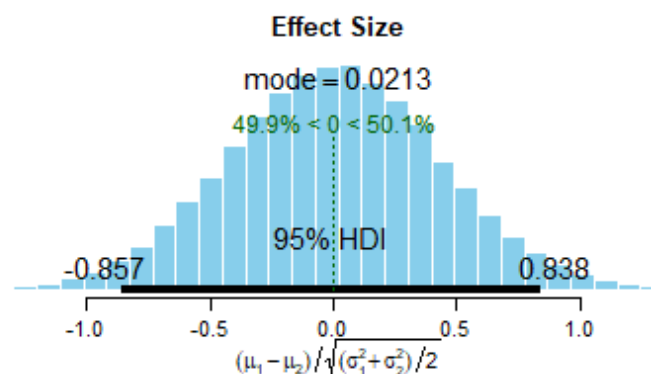

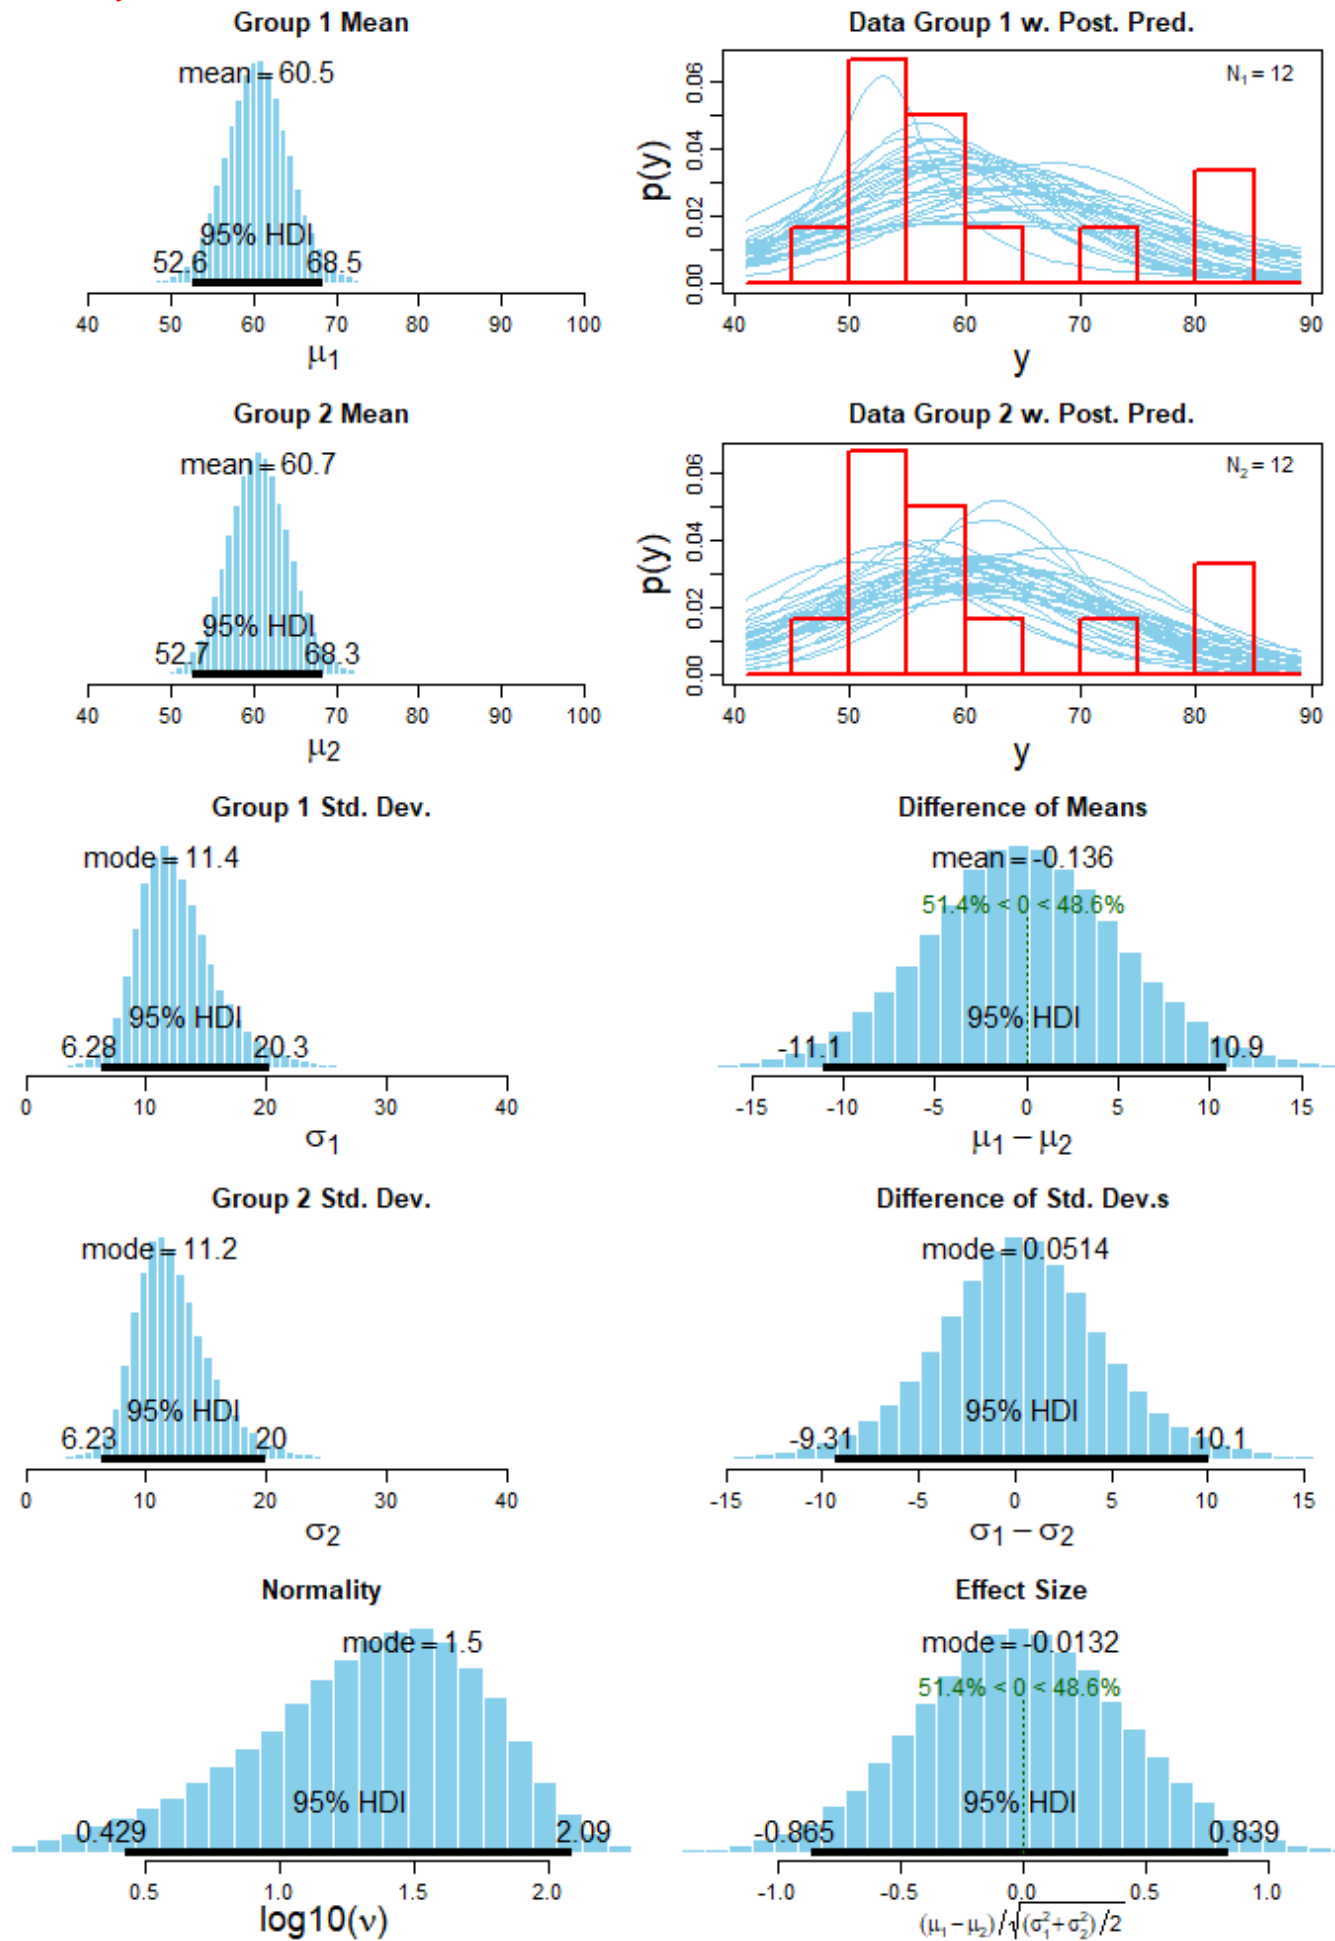

Group 1 = Test day 8

Body mass comparison

Group 2: Test day 14

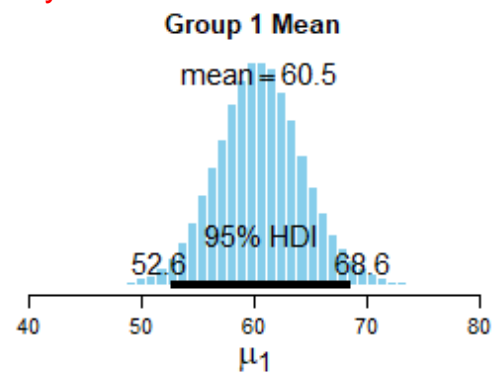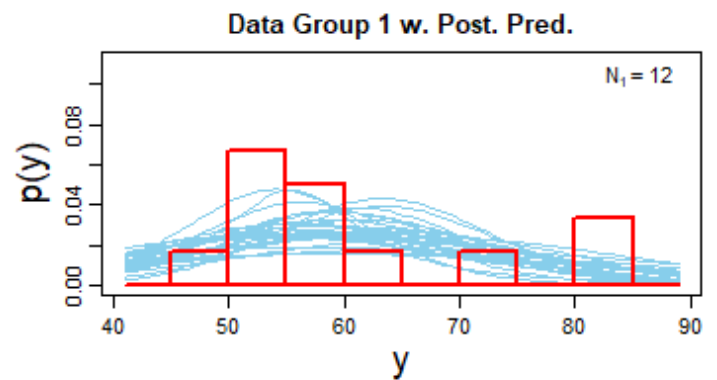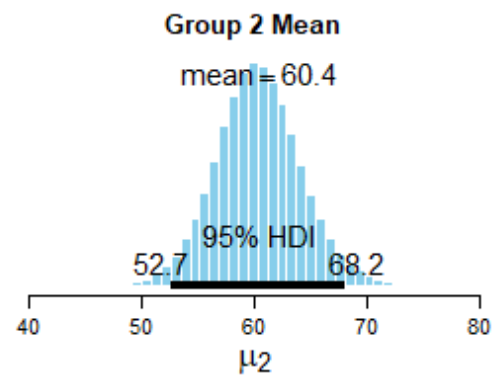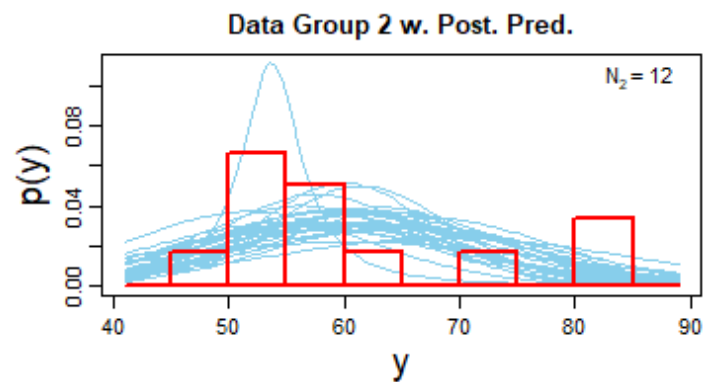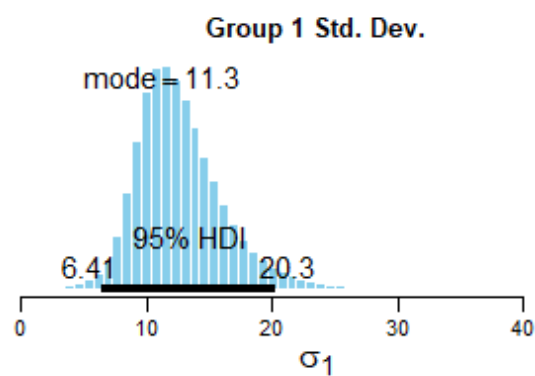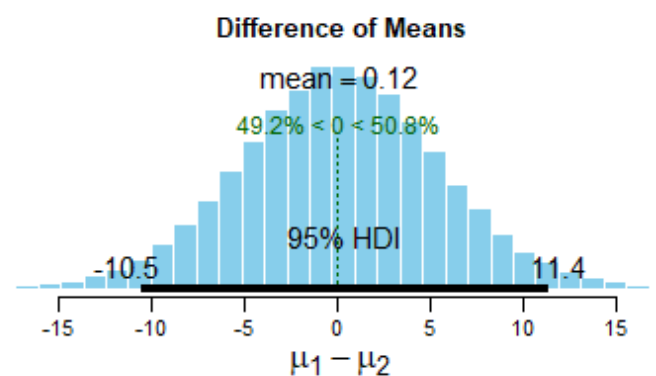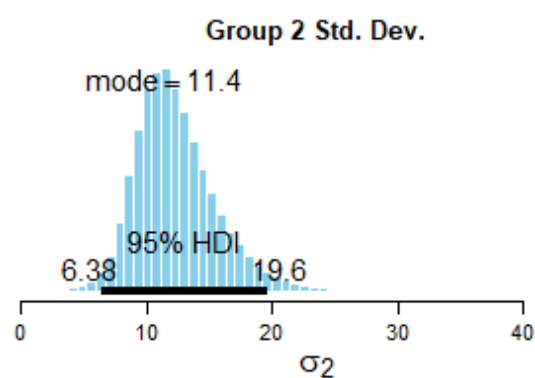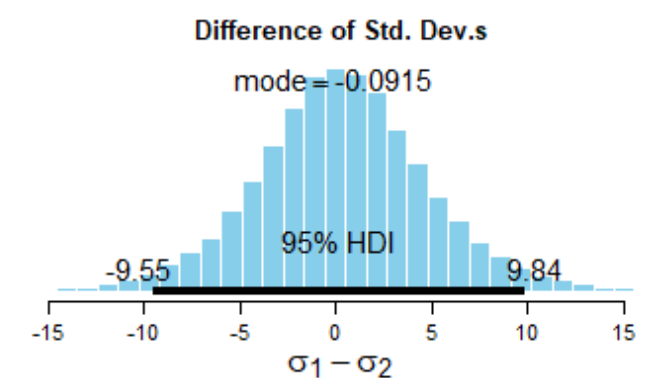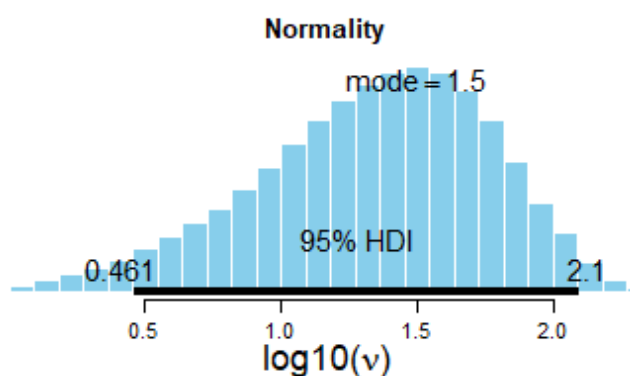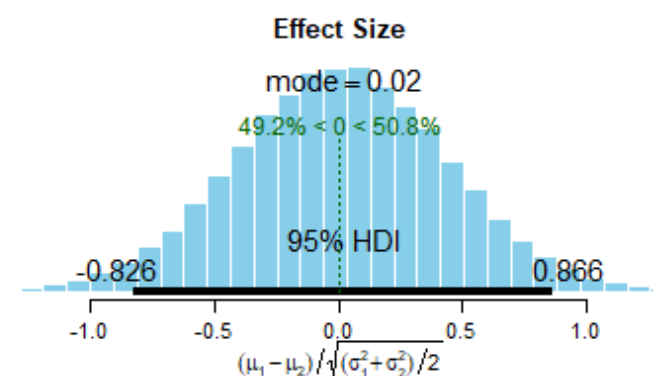

Group 1 = Test day 14

Body mass comparison

Group 2: Test day 21

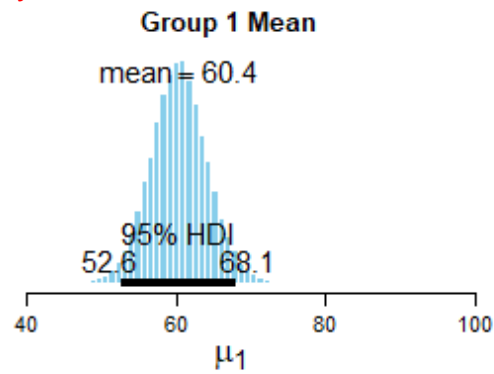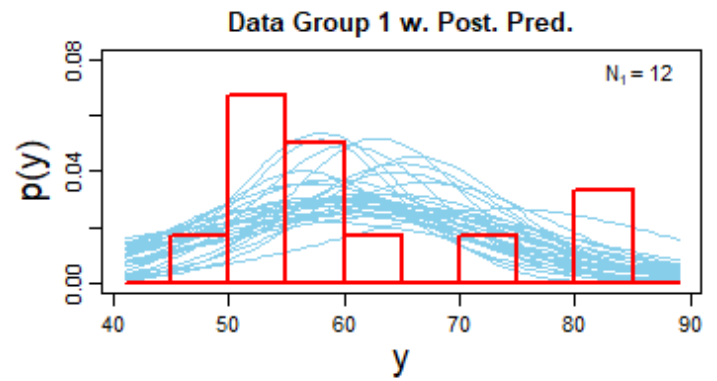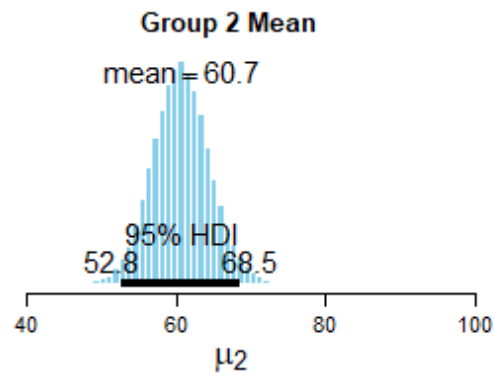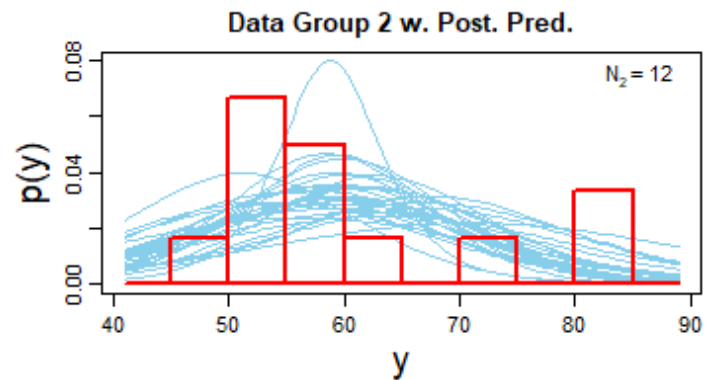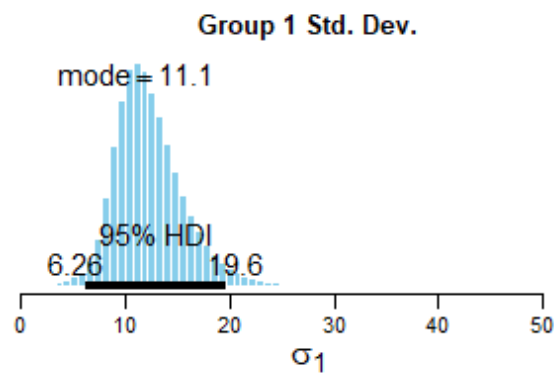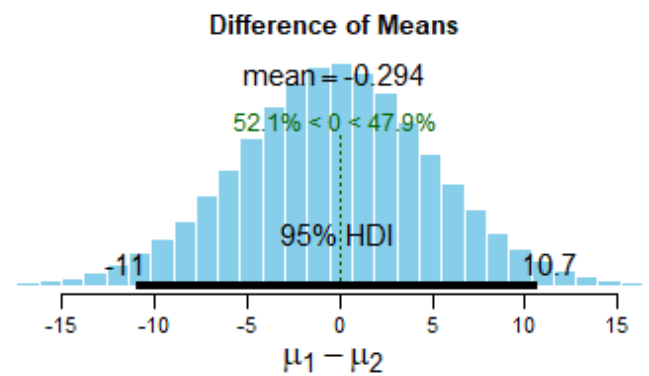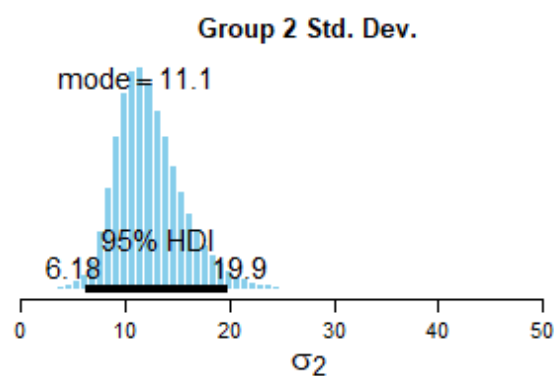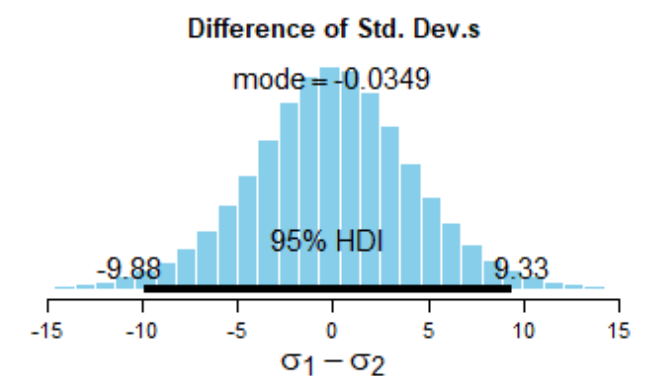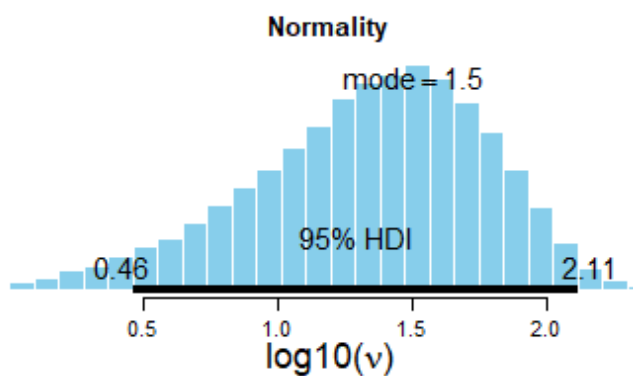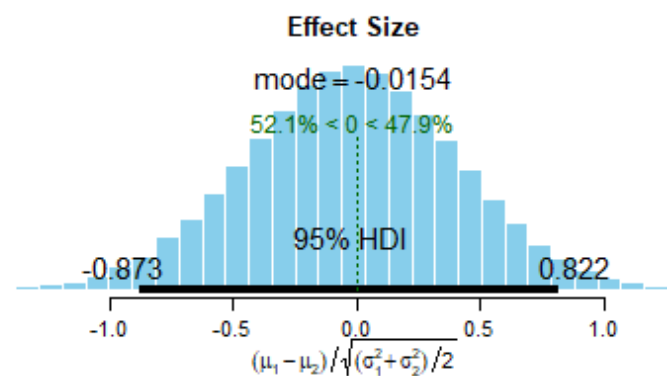

Group 1 = Test day 8  
Group 2: Test day 21

1RM Bench Press

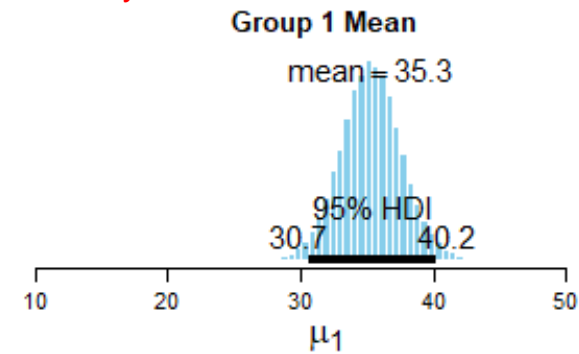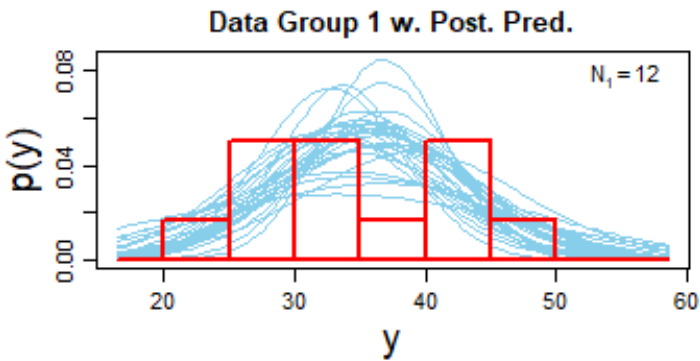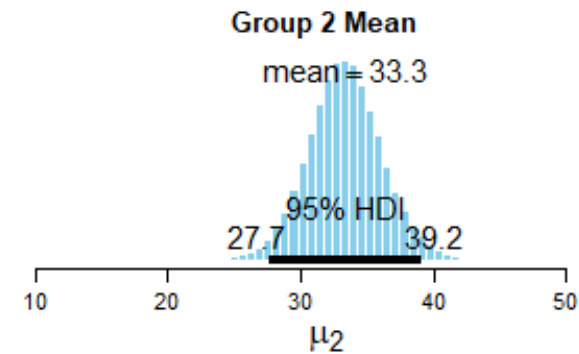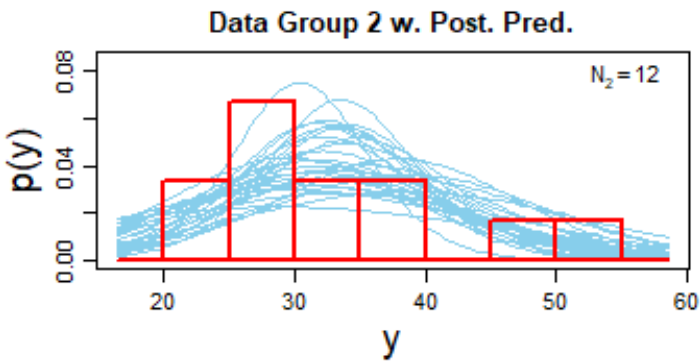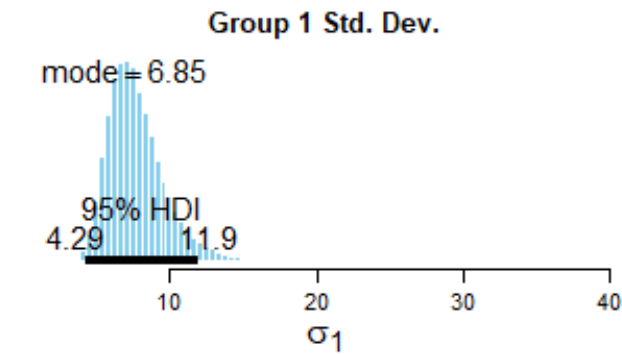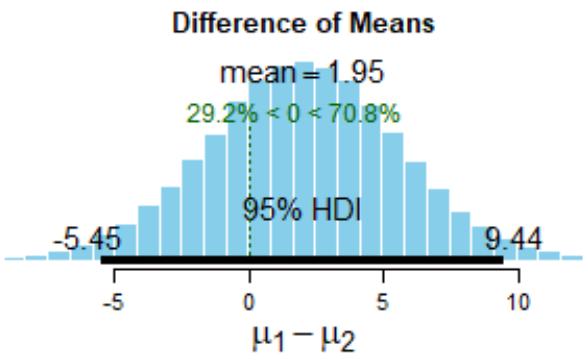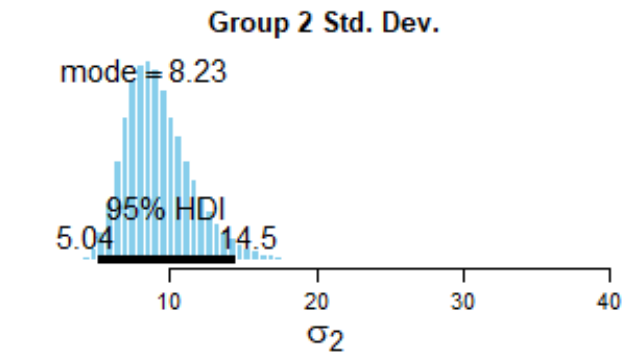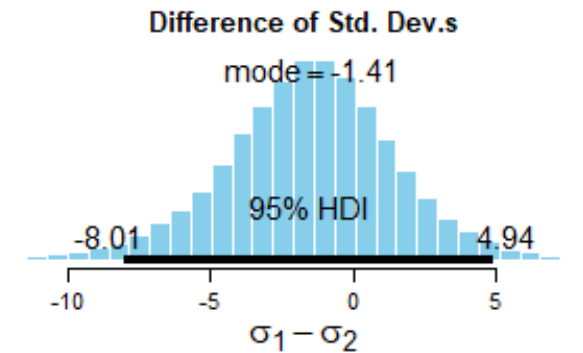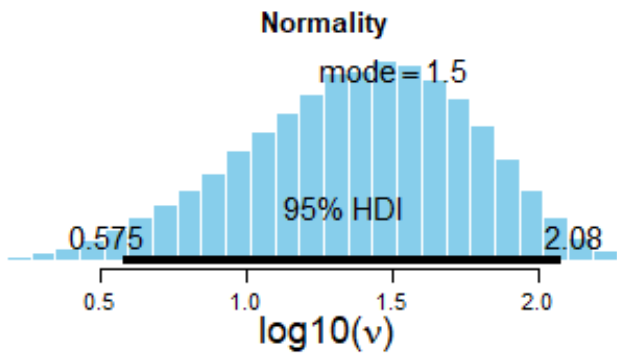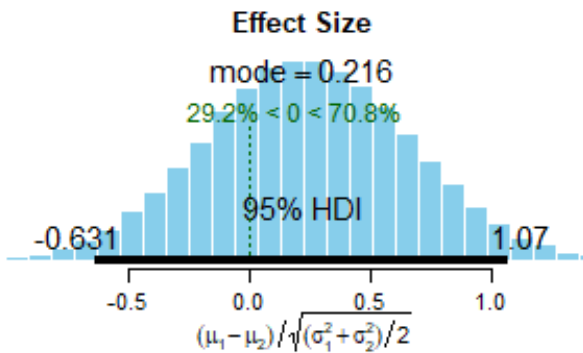

Group 1 = Test day 8  
Group 2: Test day 14

1RM Bench Press

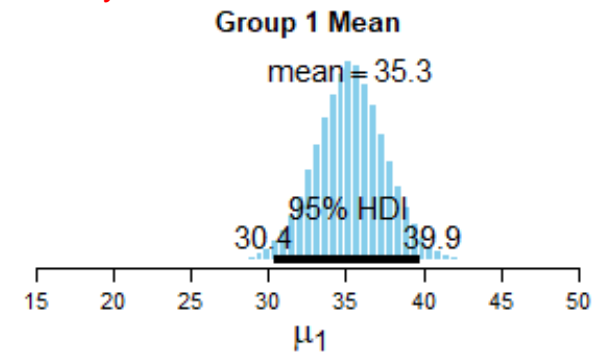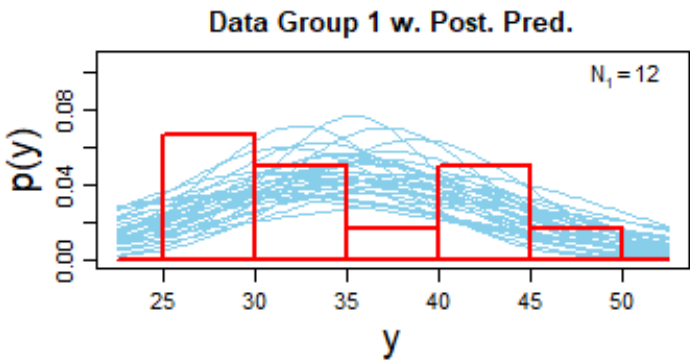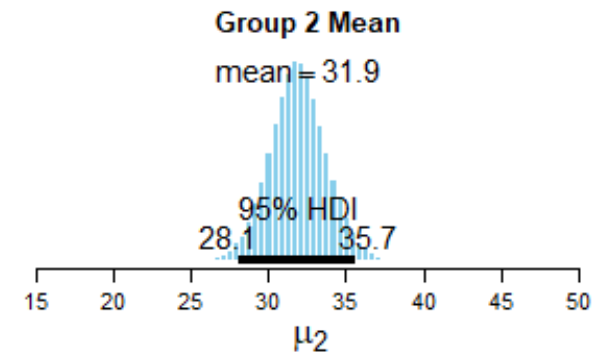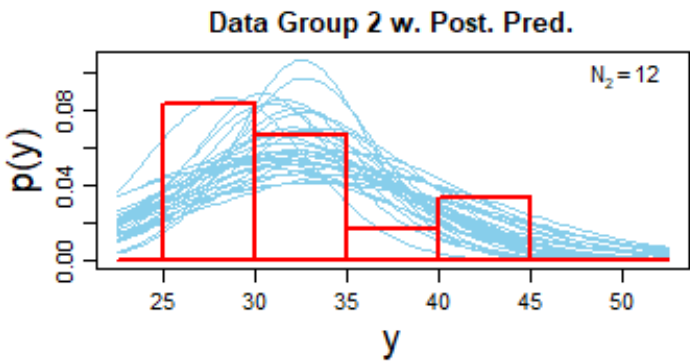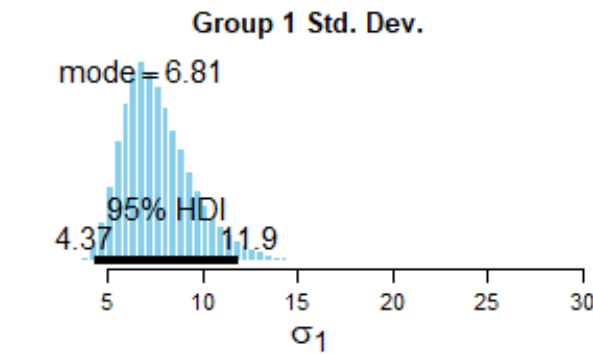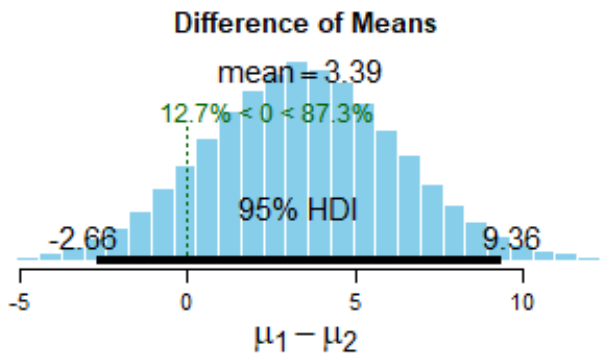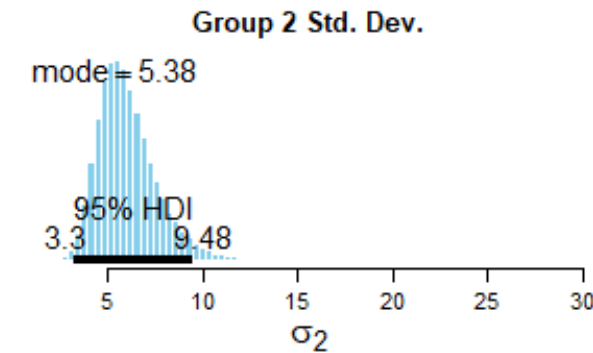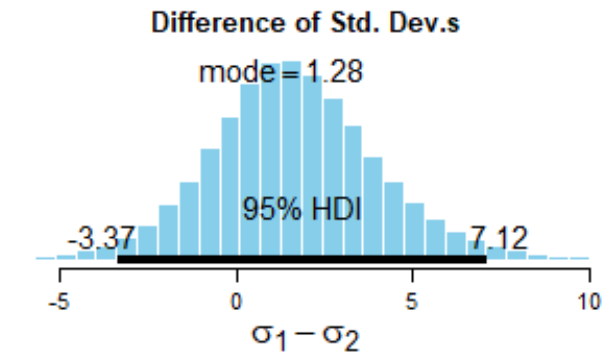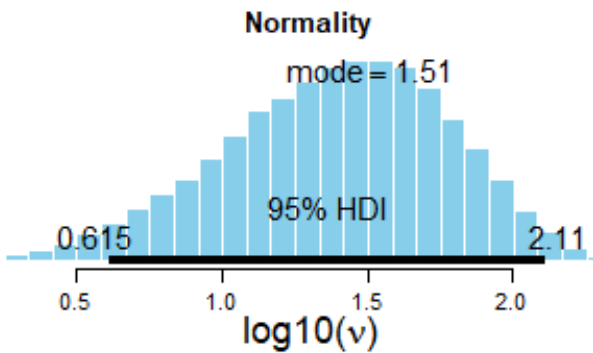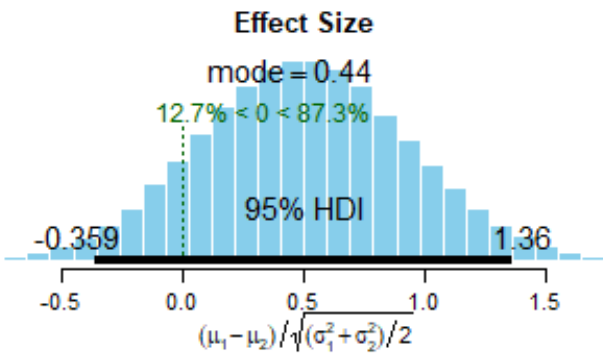



Group 1 = Test day 2

1RM Bench Press

Group 2: Test day 8

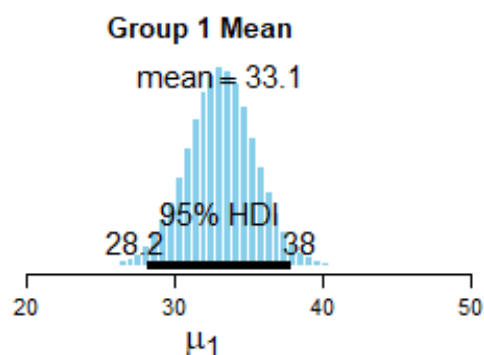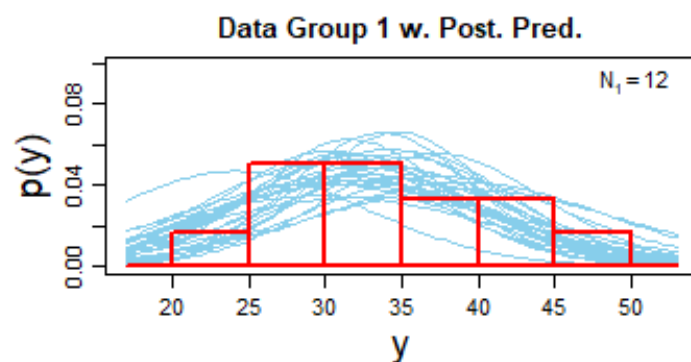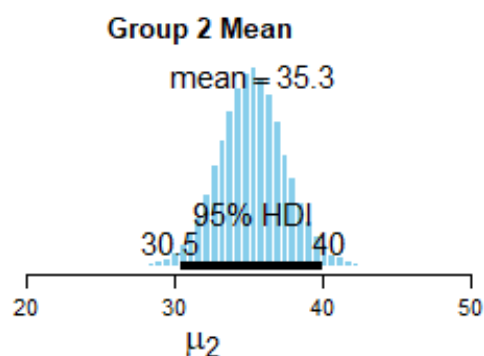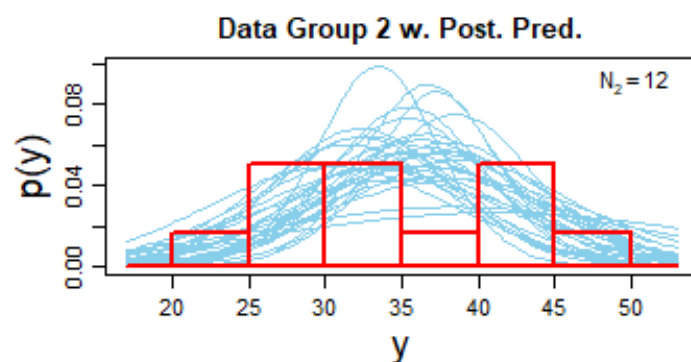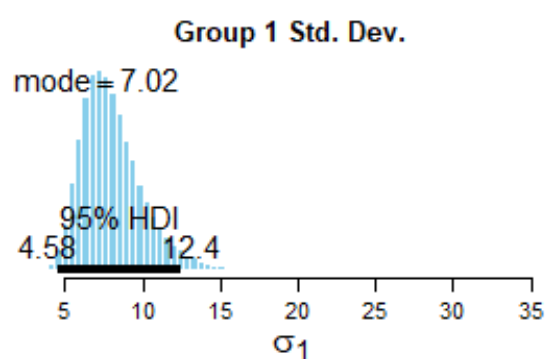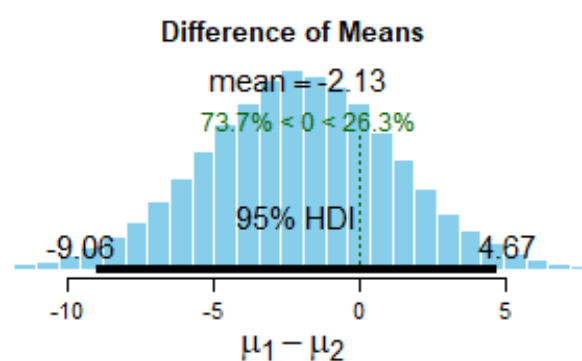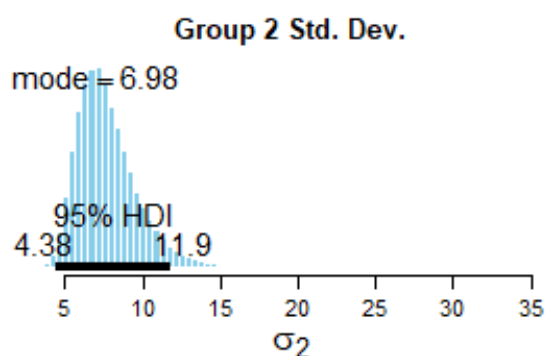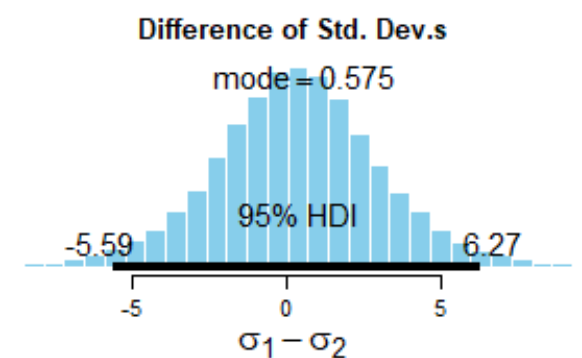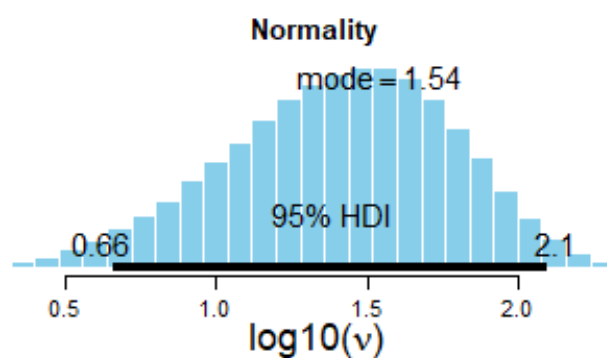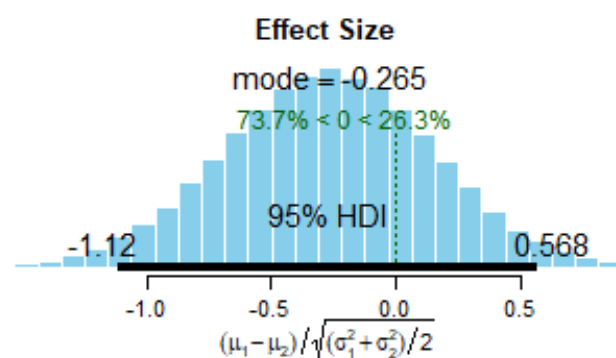

Group 1 = Test day 2  
Group 2: Test day 21

1RM Bench Press

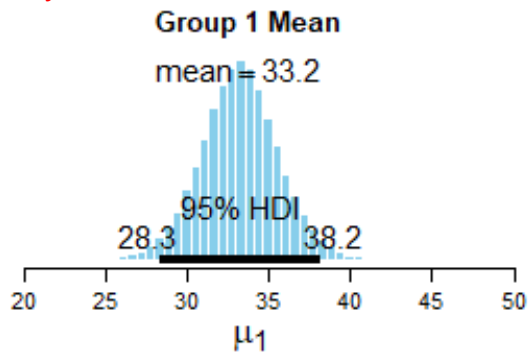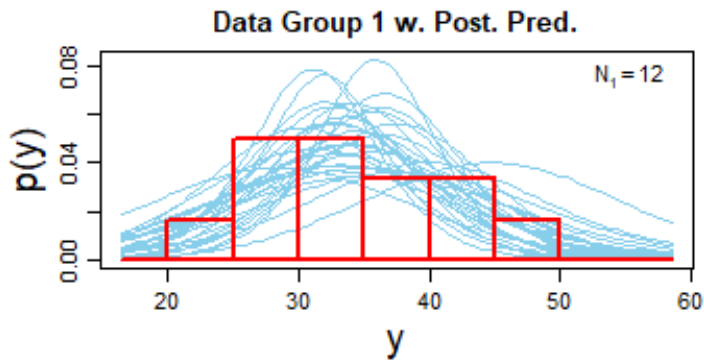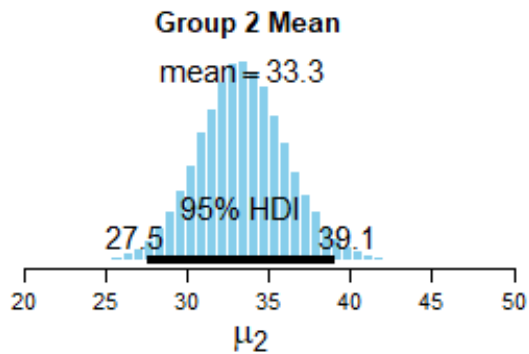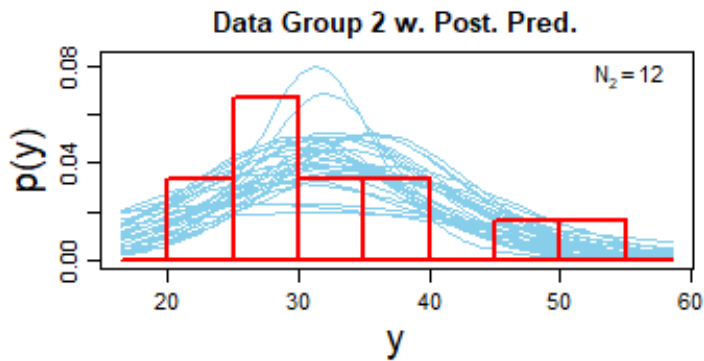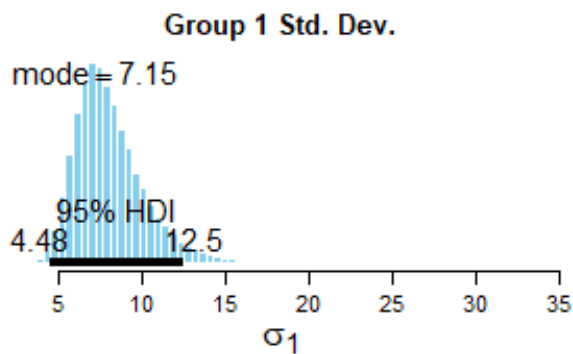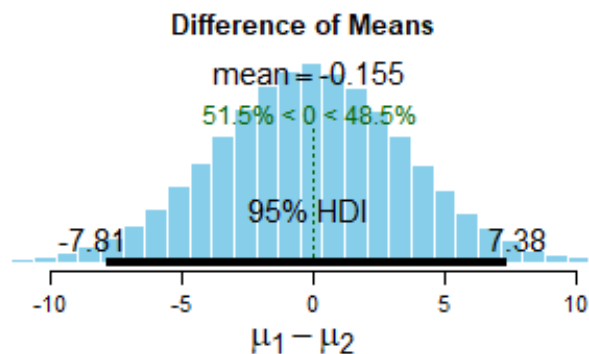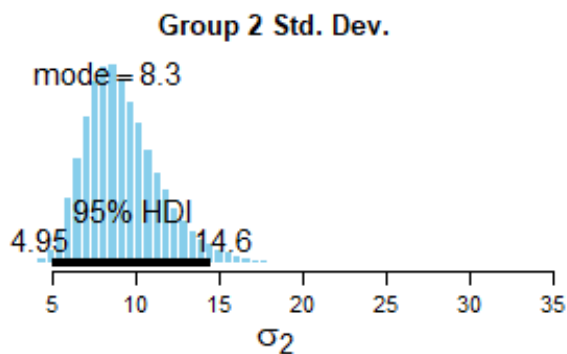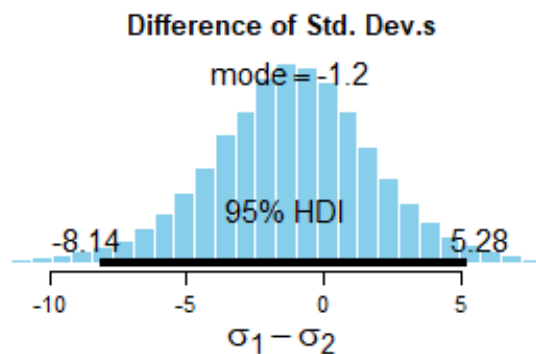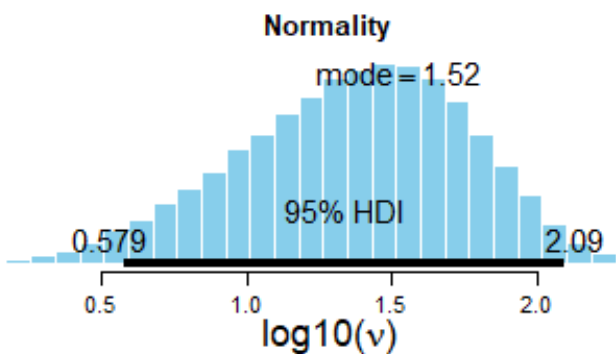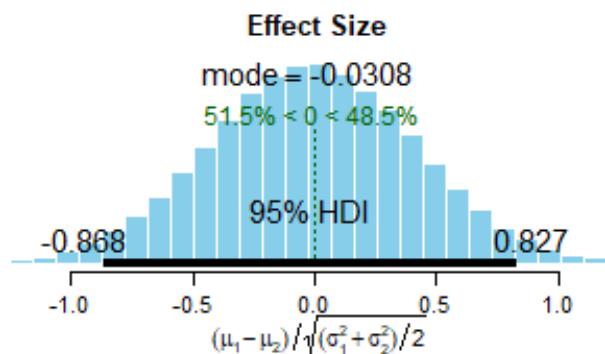

Group 1 = Test day 2  
Group 2: Test day 14

1RM Bench Press

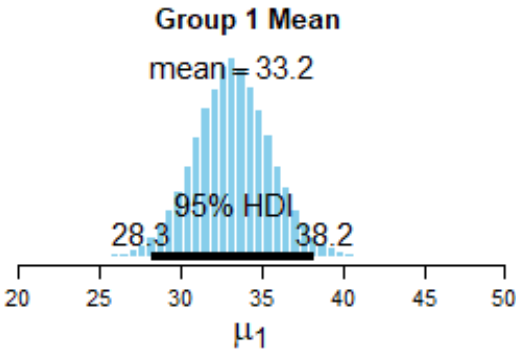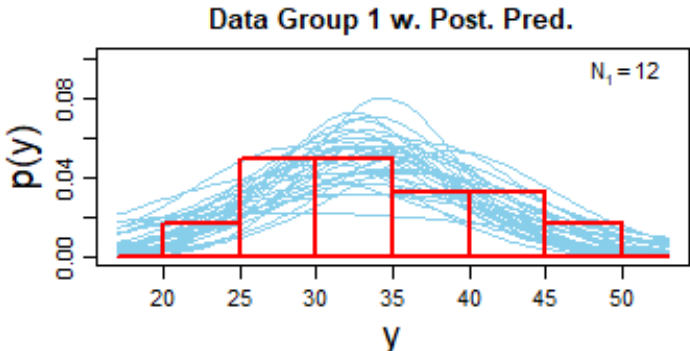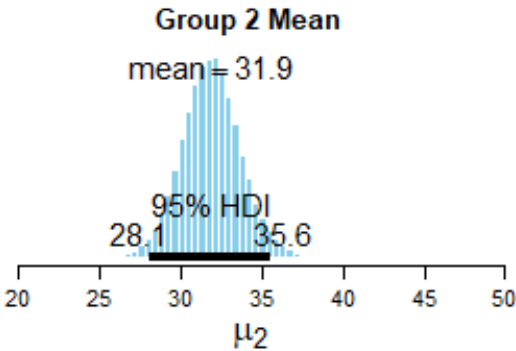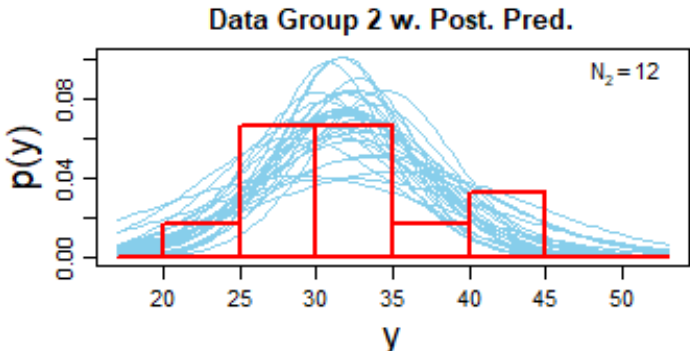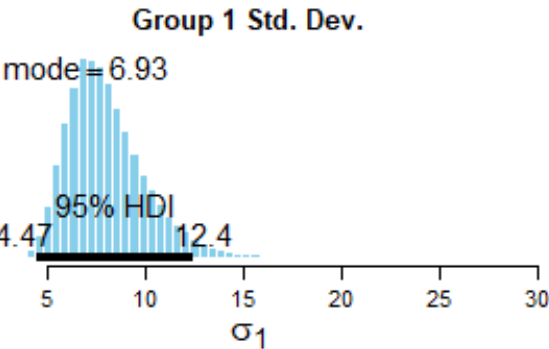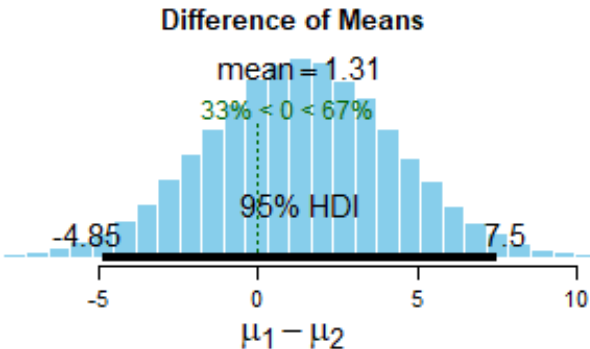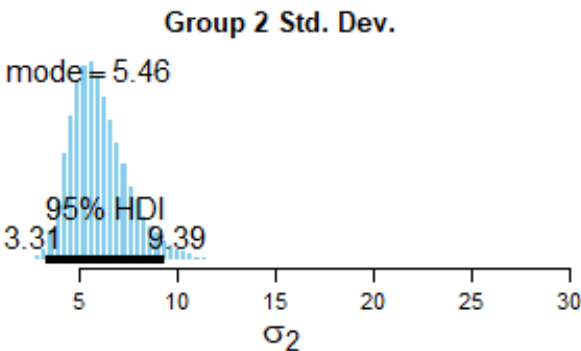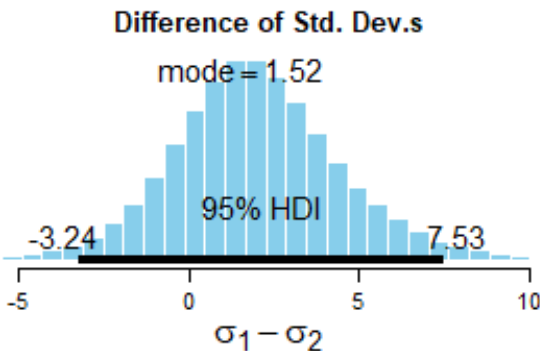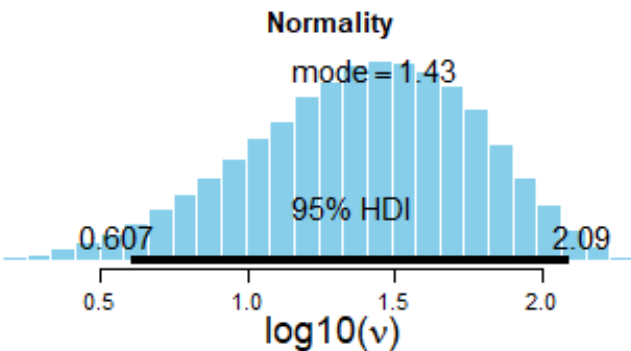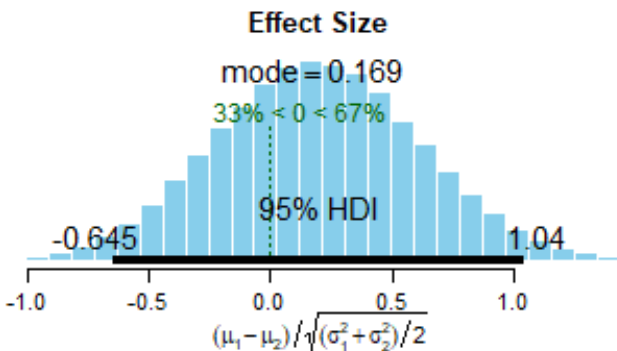

Group 1 = Test day 14  
Group 2: Test day 21

1RM Bench Press

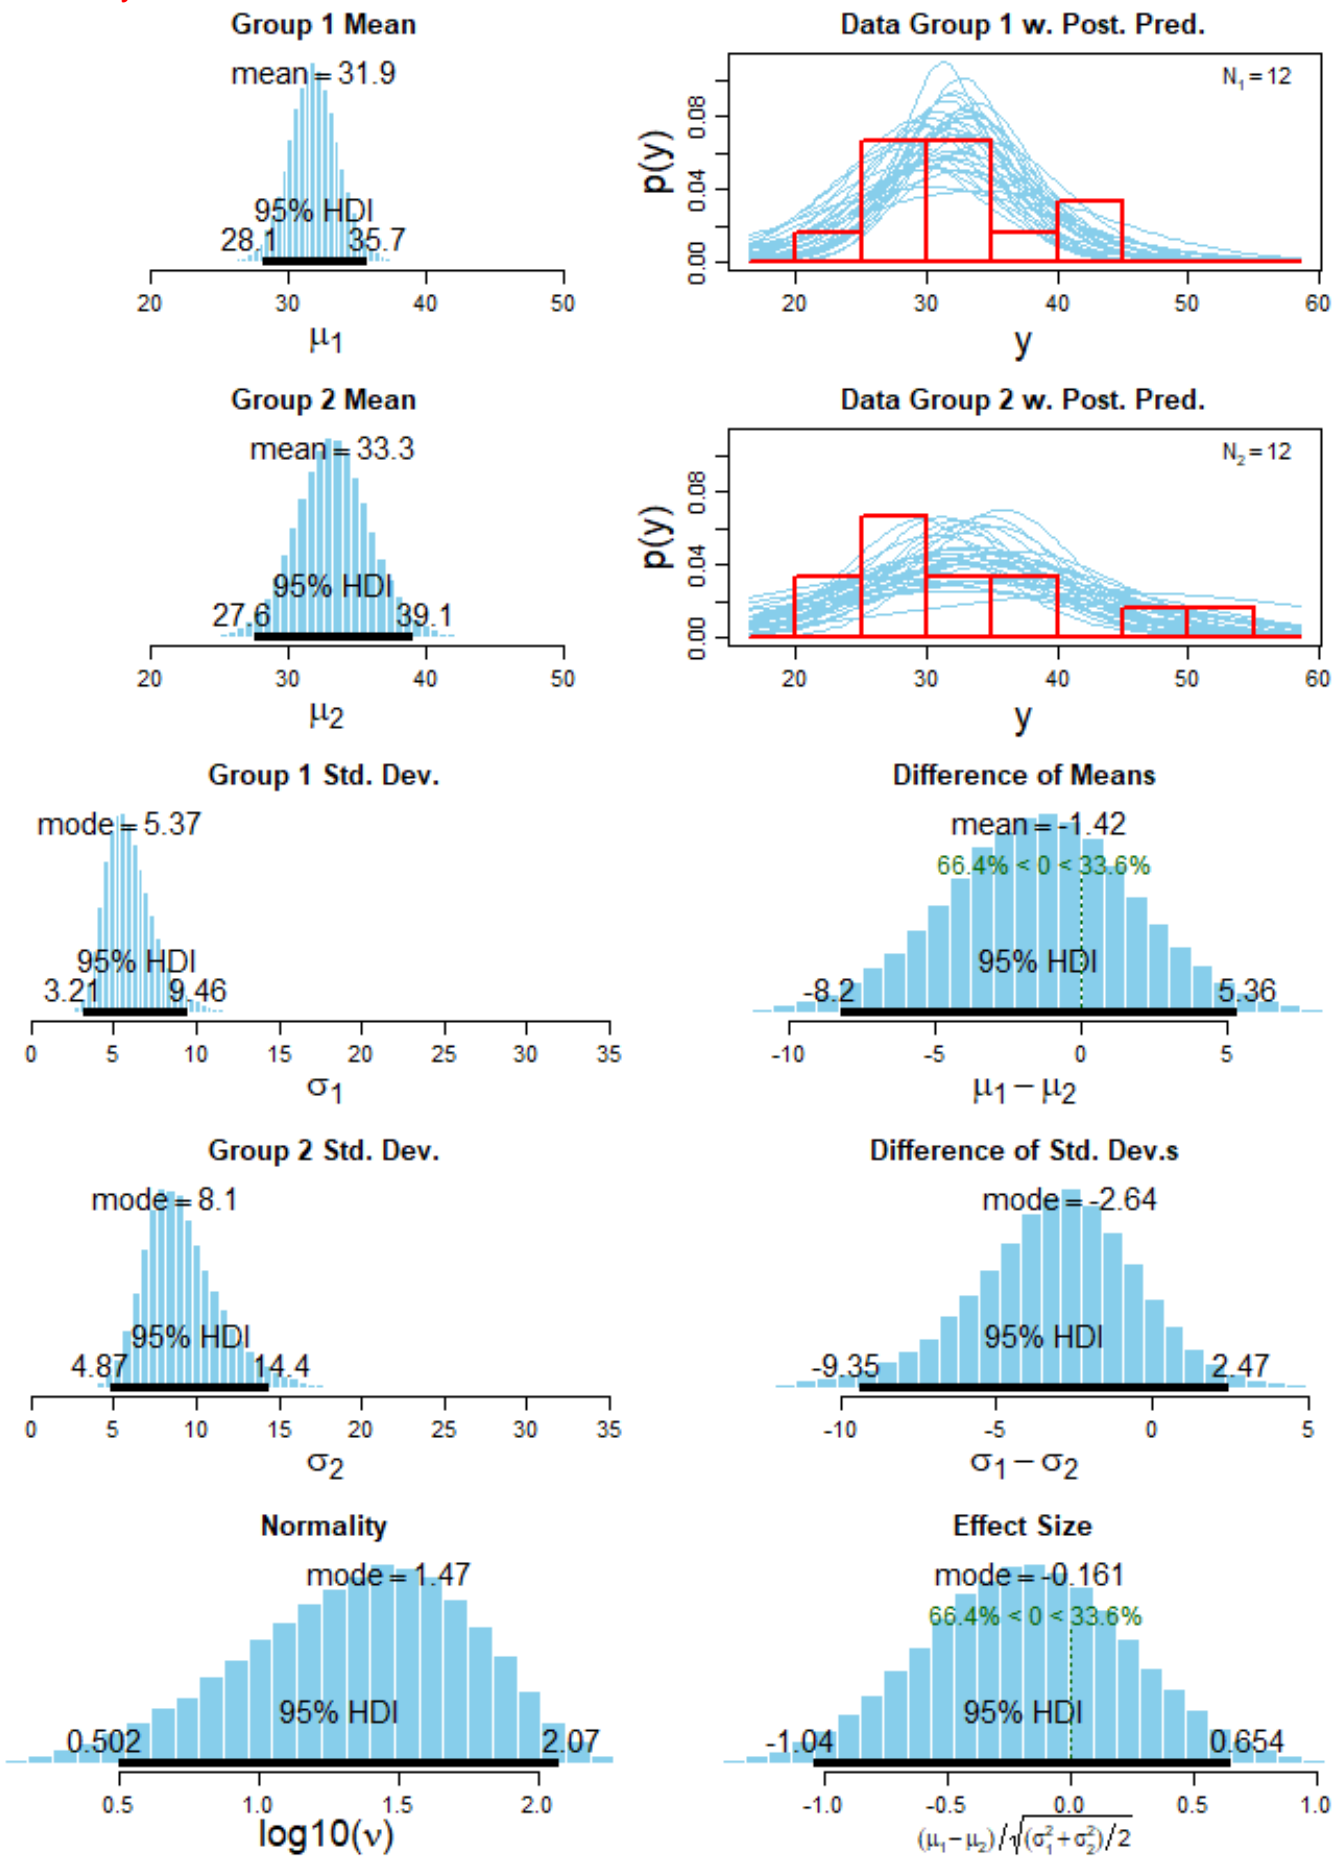

Group 1 = Test day 8

1RM Leg Press

Group 2: Test day 21

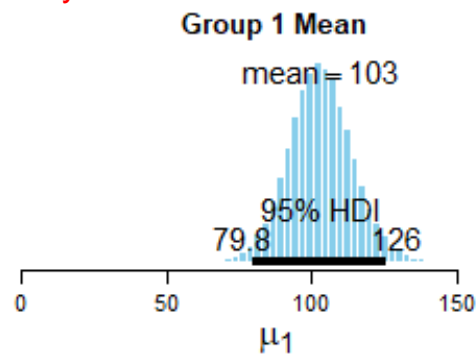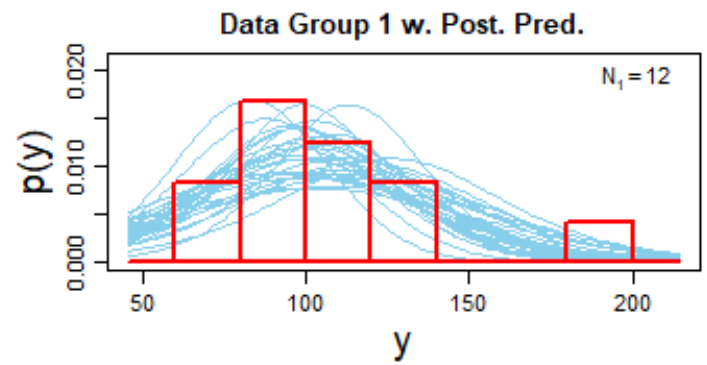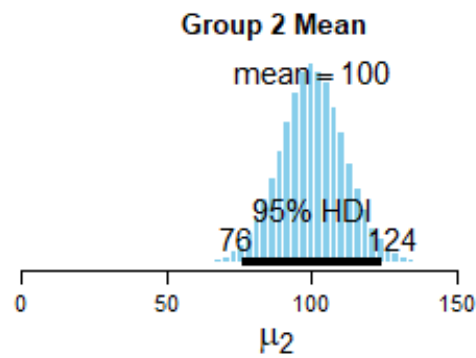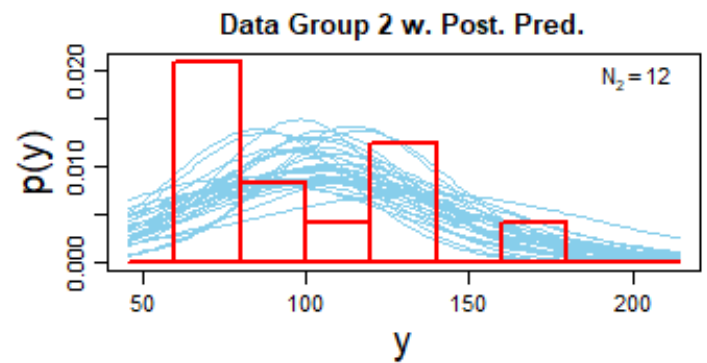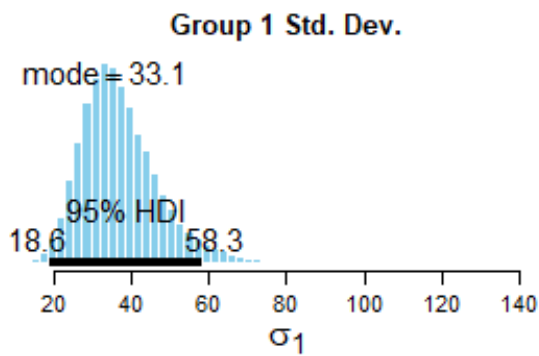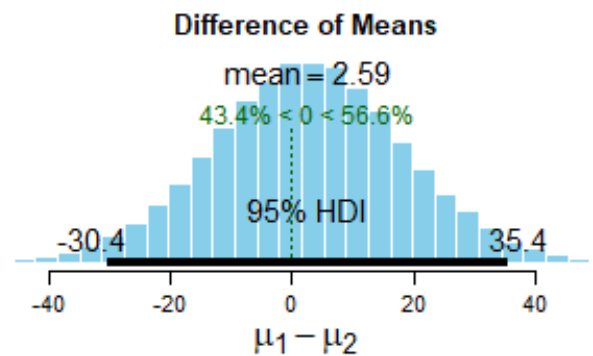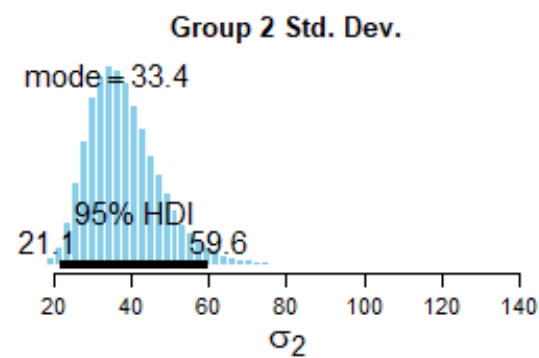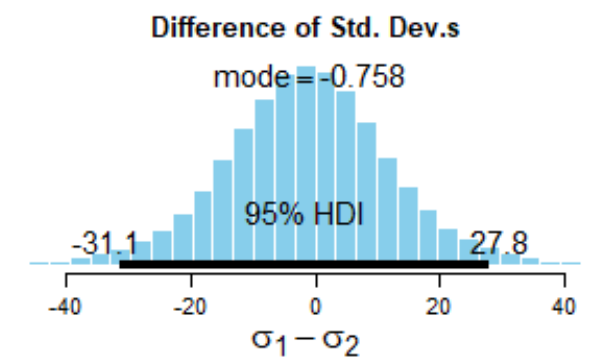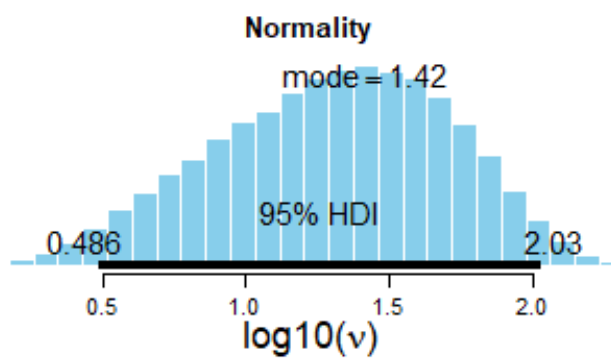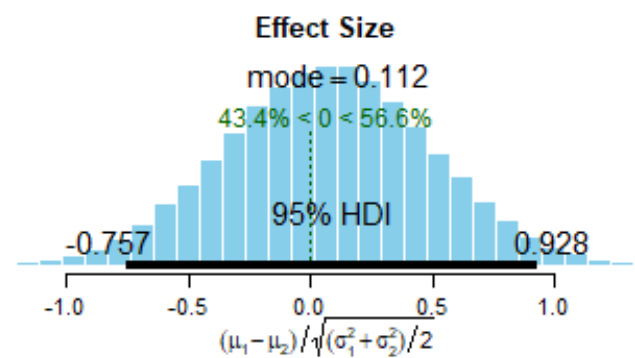

Group 1 = Test day 8  
Group 2: Test day 14

1RM Leg Press

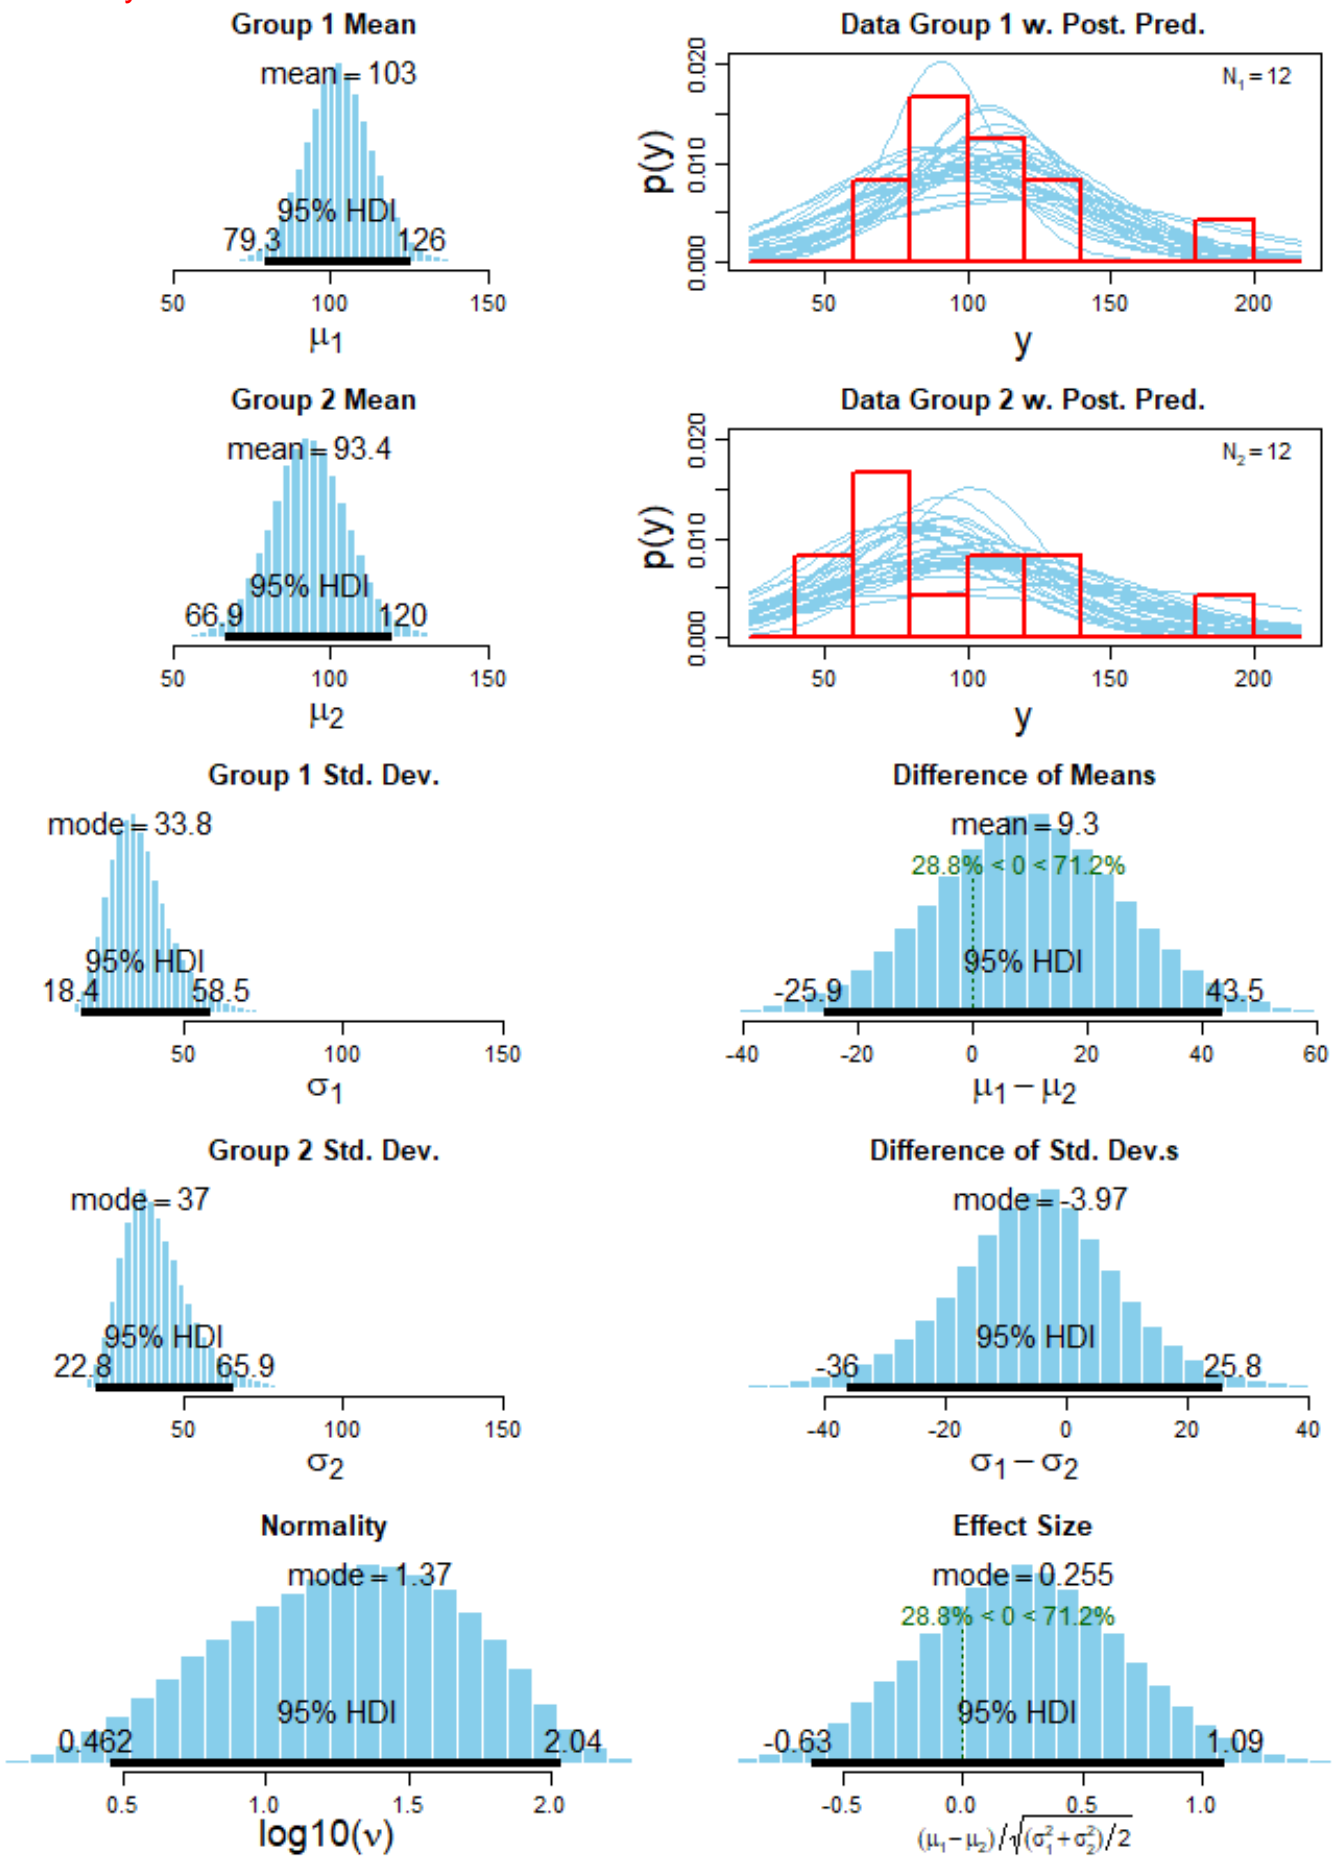

Group 1 = Test day 2

1RM Leg Press

Group 2: Test day 8

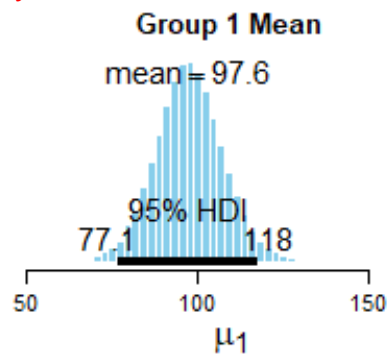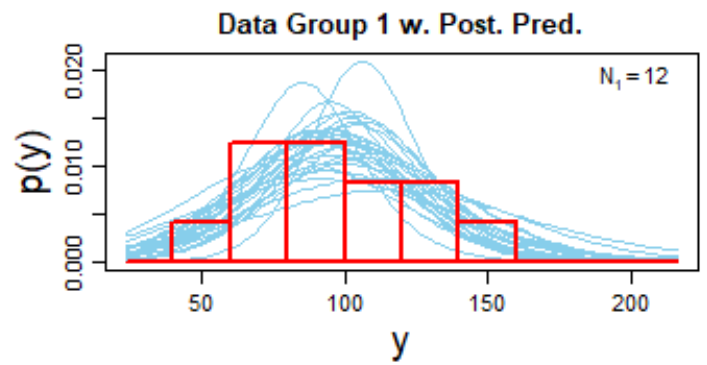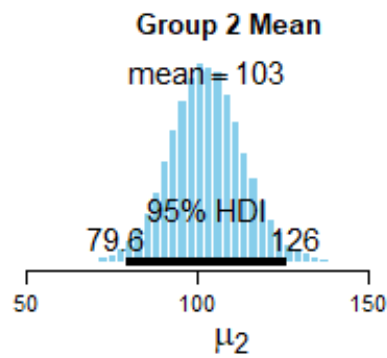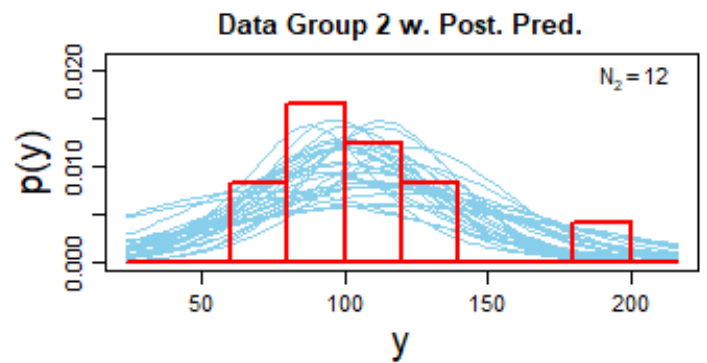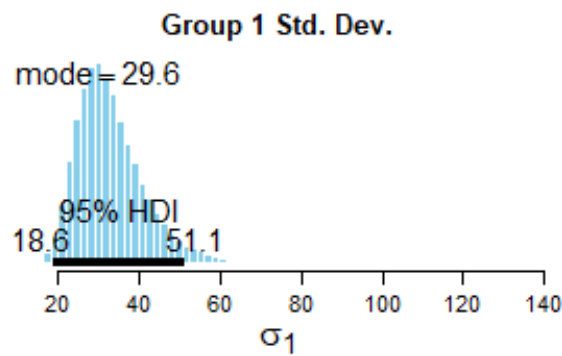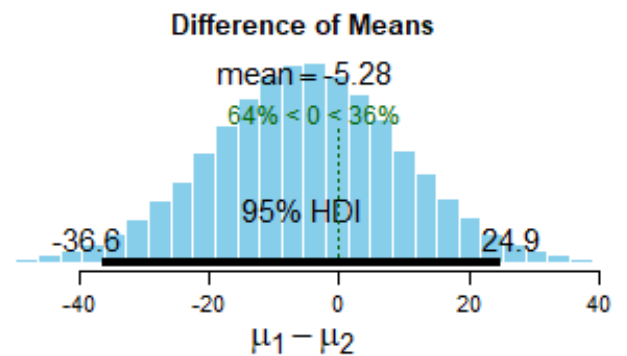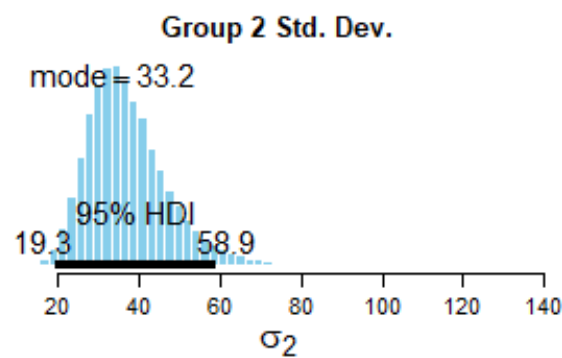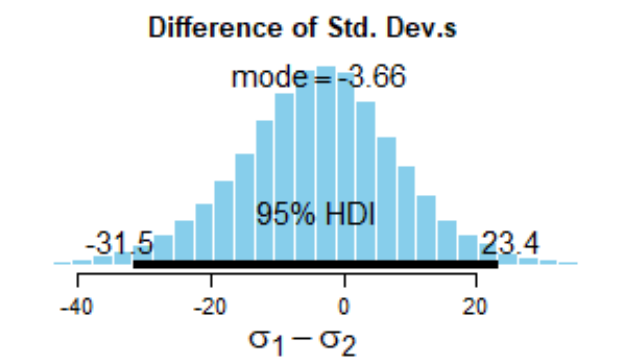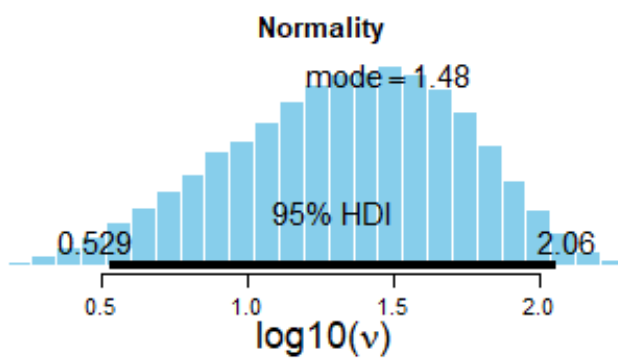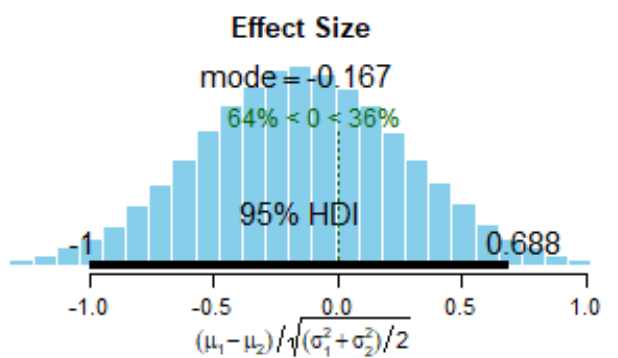

Group 1 = Test day 2  
Group 2: Test day 8

1RM Leg Press

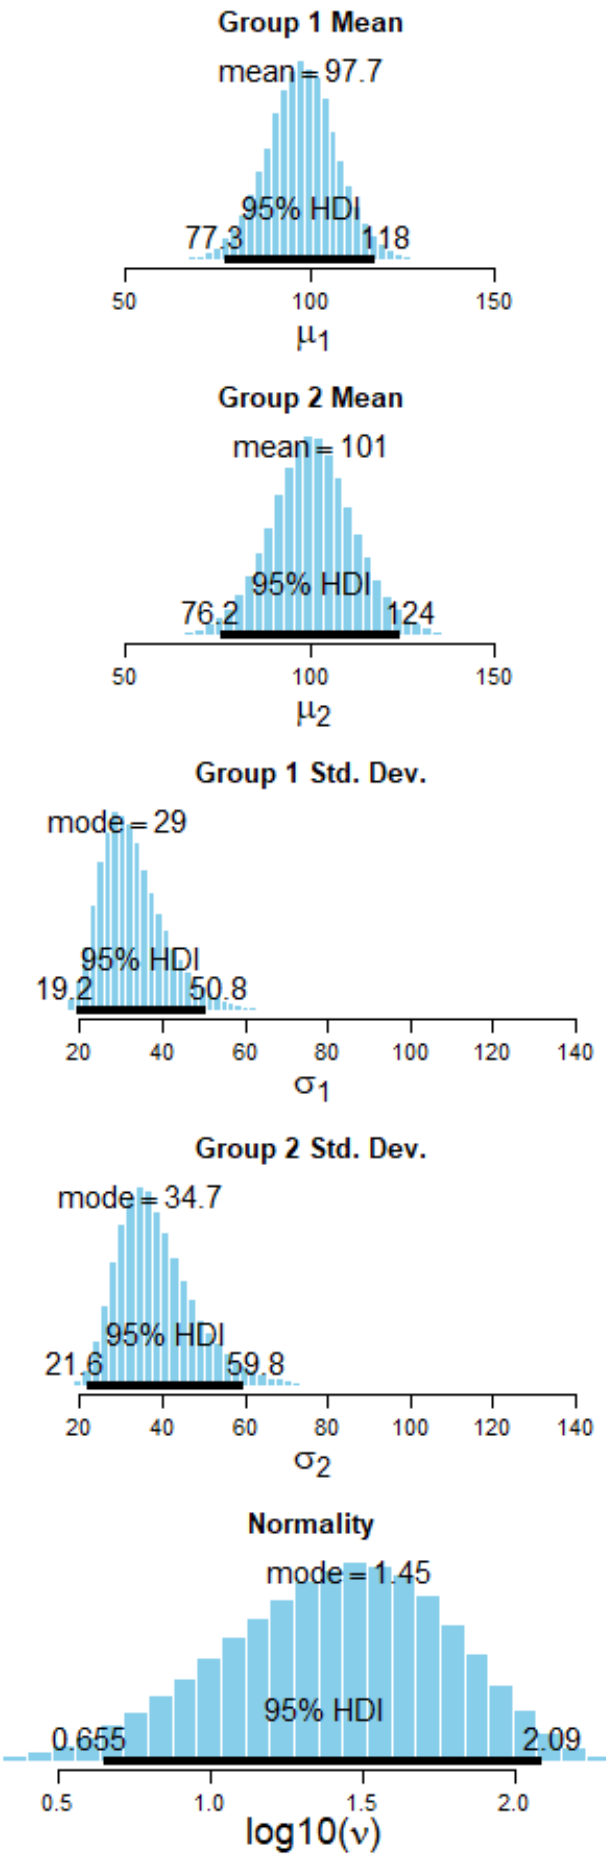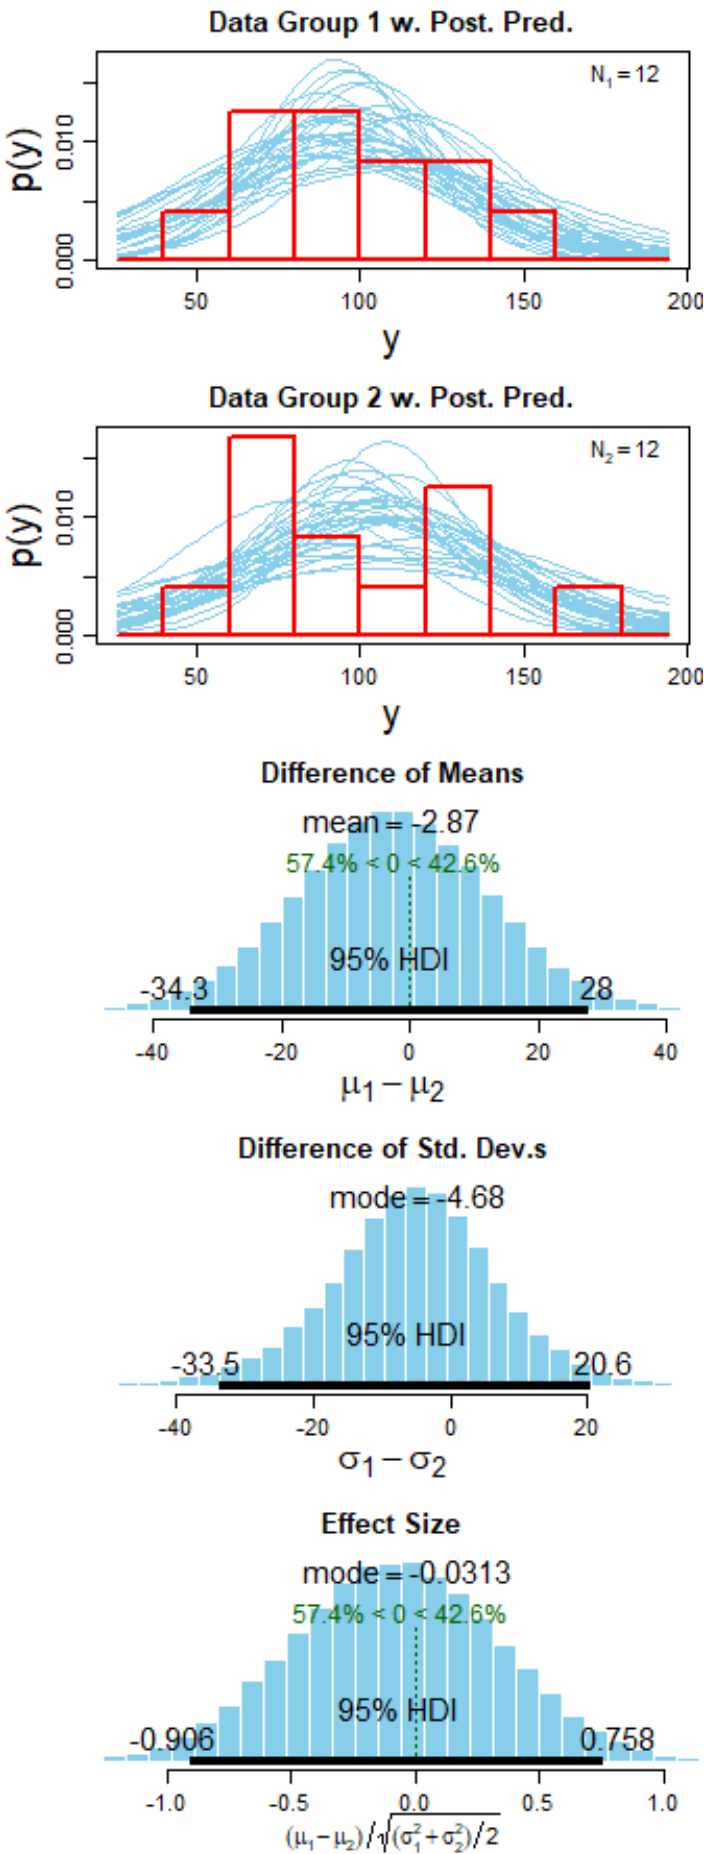



Group 1 = Test day 2

Group 2: Test day 14

1RM Leg Press

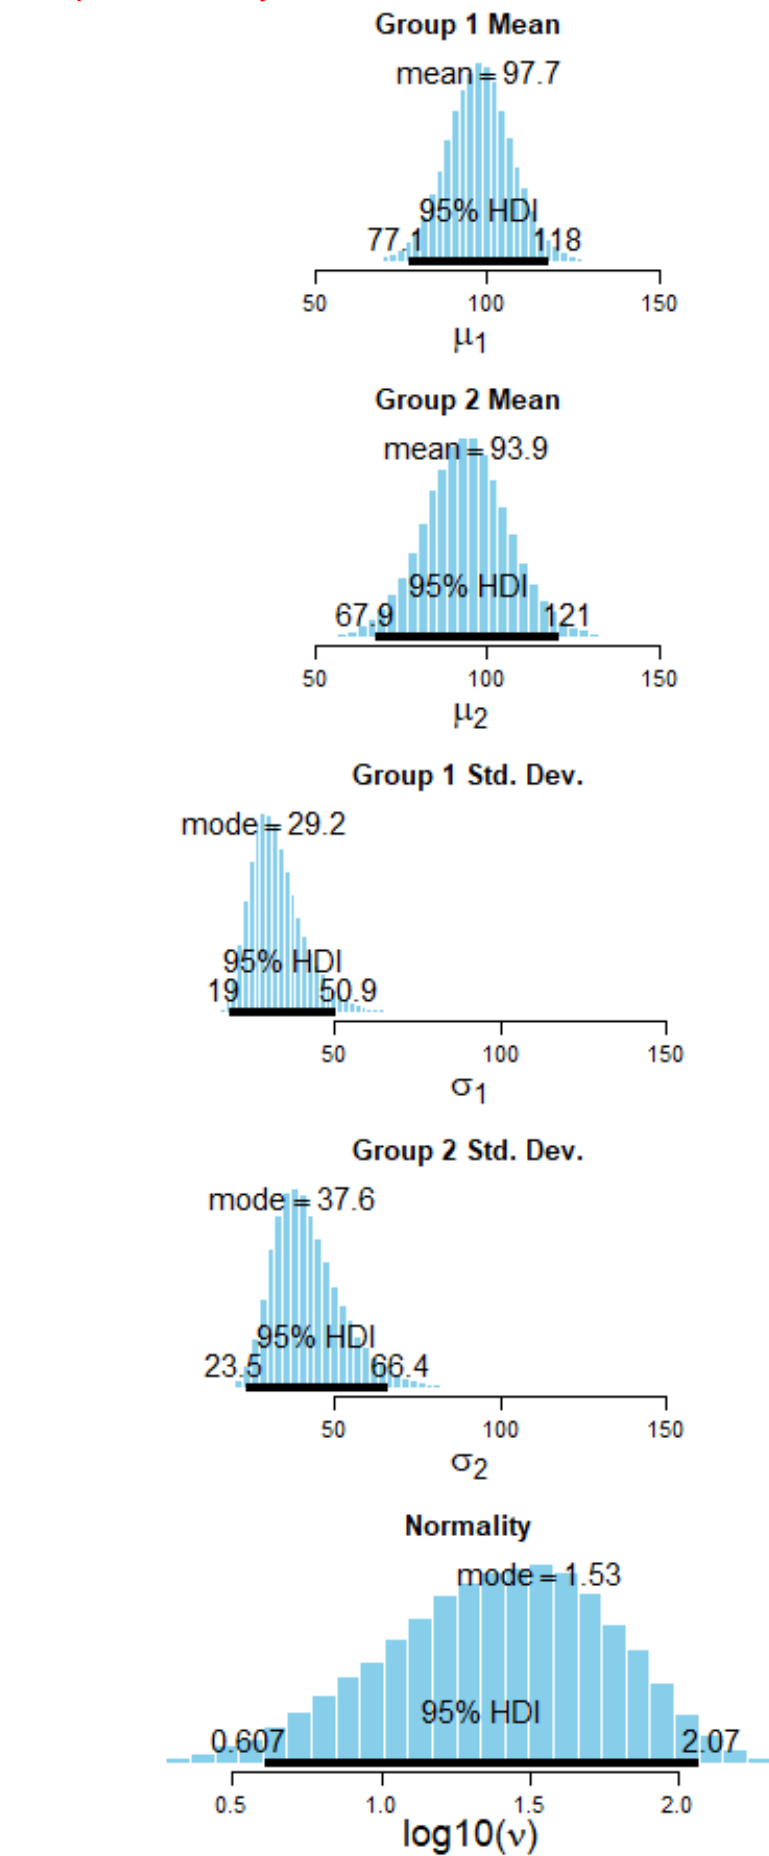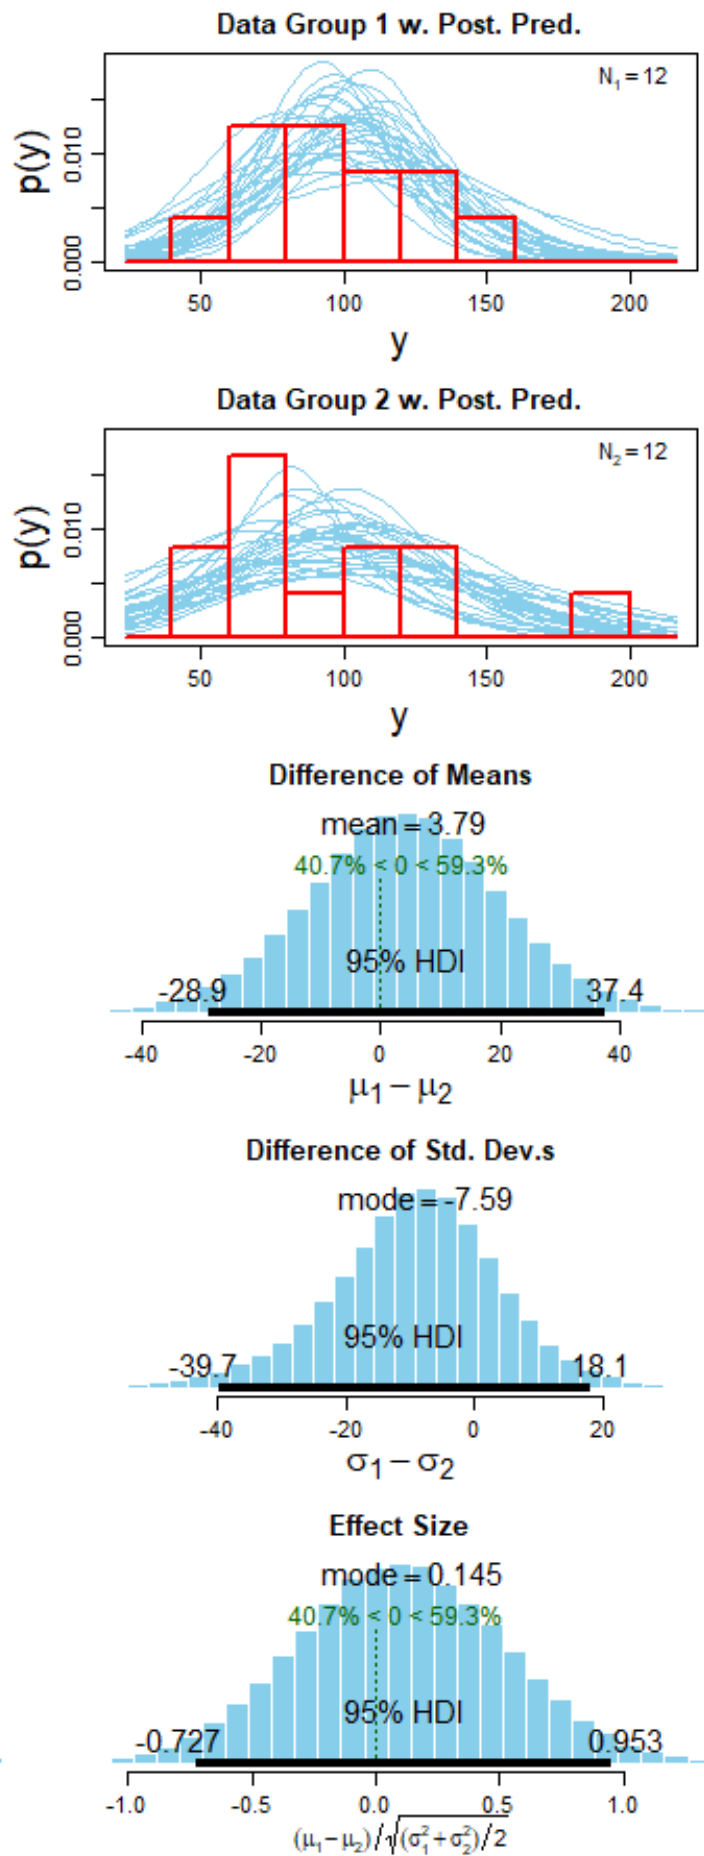

Group 1 = Test day 14

1RM Leg Press

Group 2: Test day 21

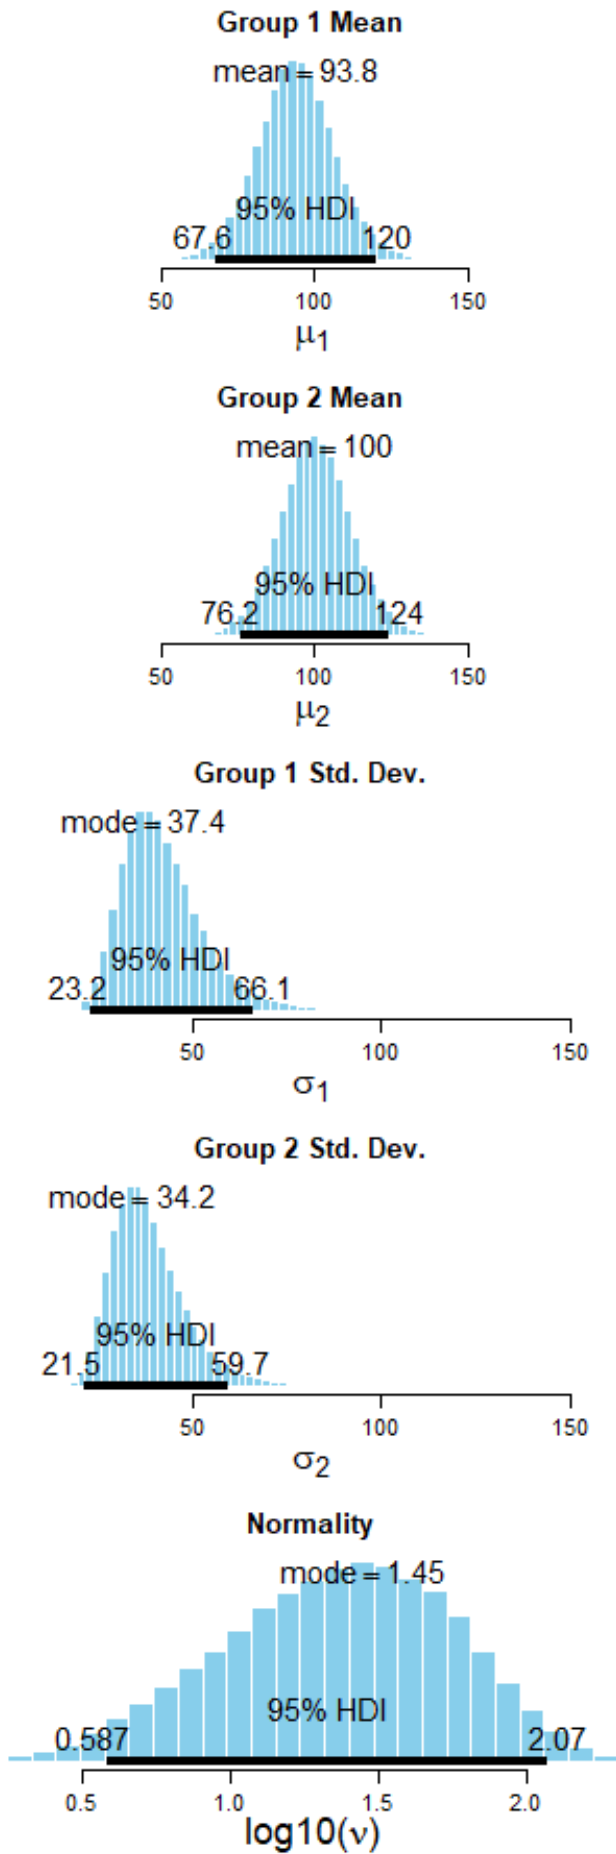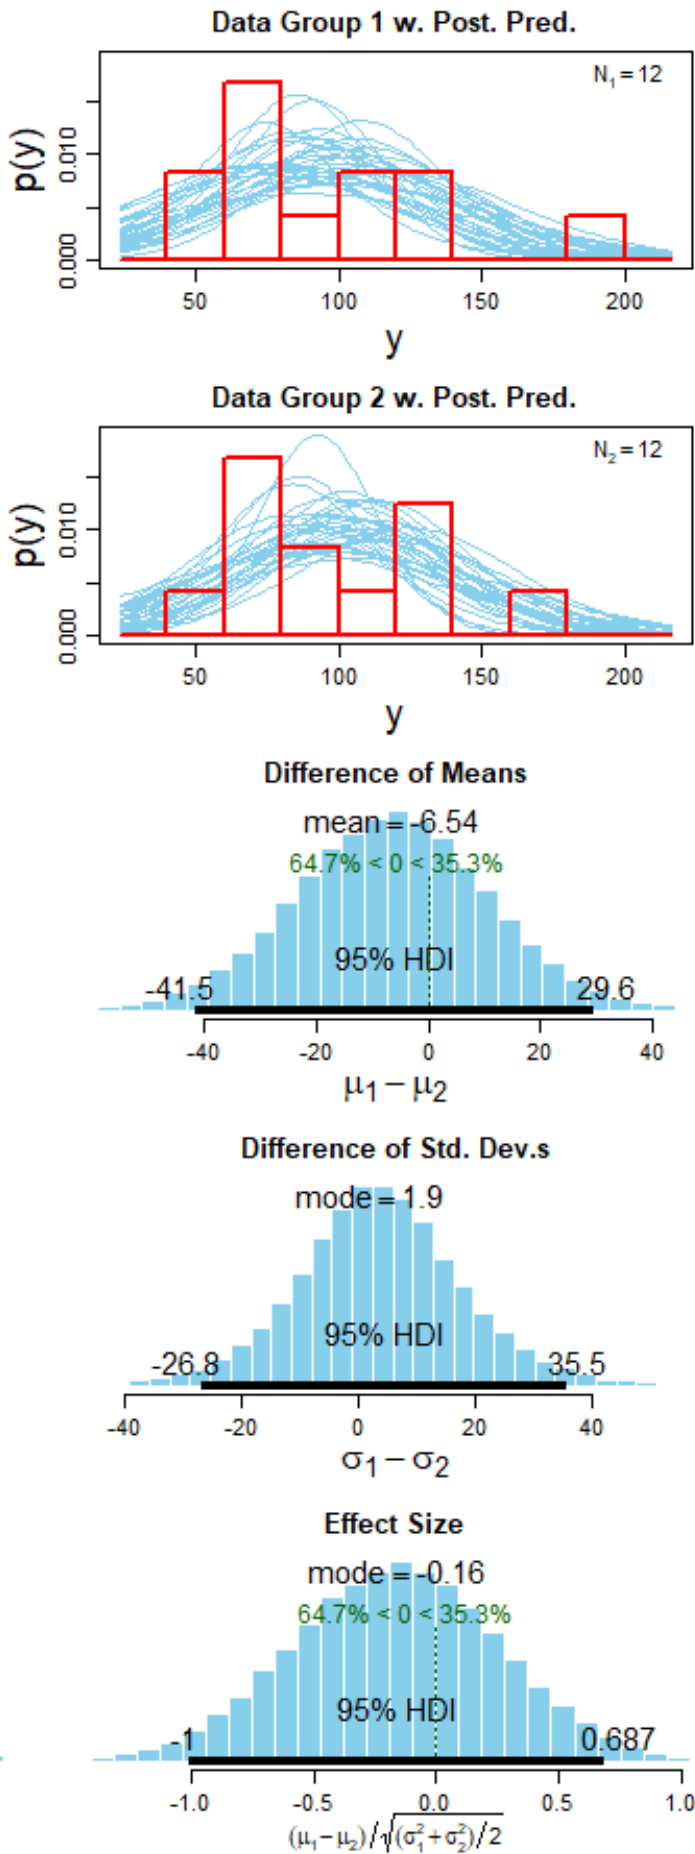

Group 1 = Test day 8  
 Group 2: Test day 21

Number of Push ups

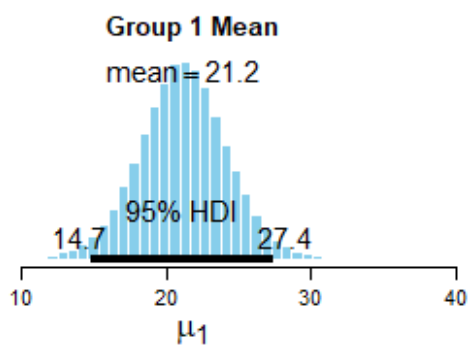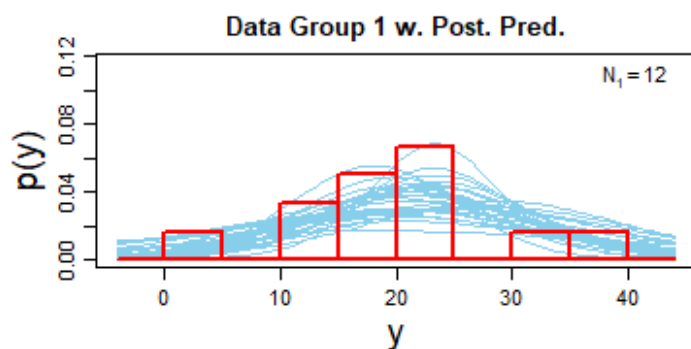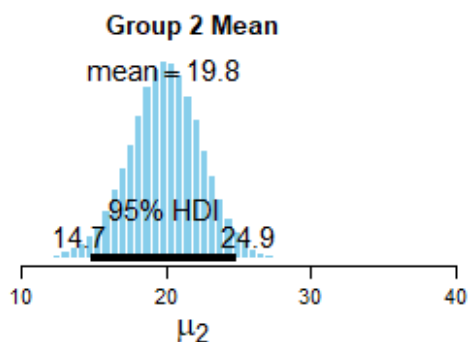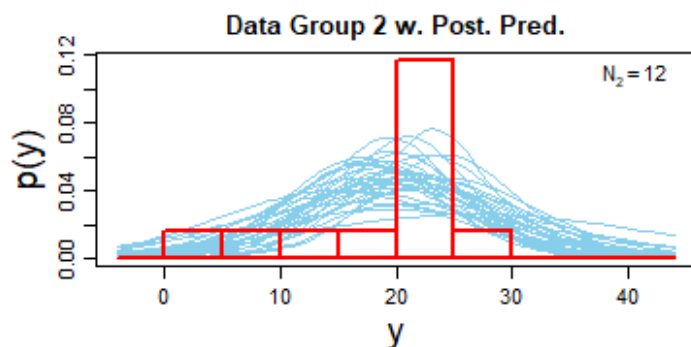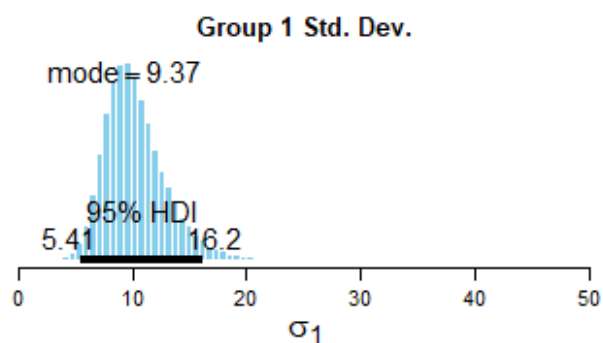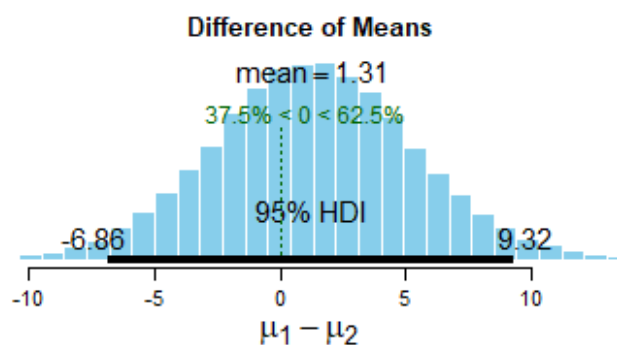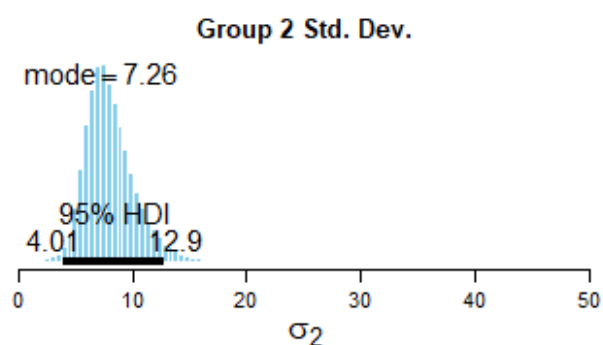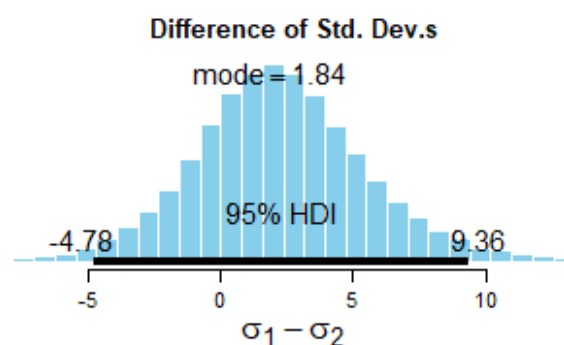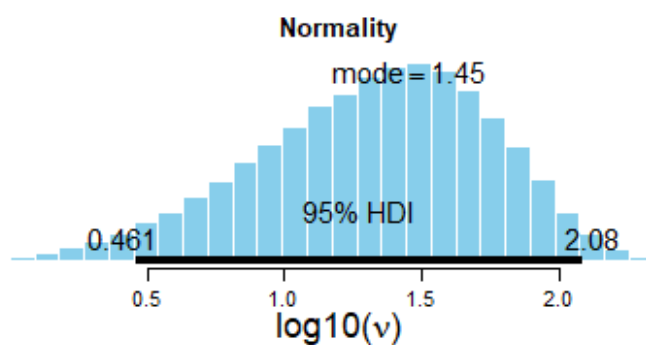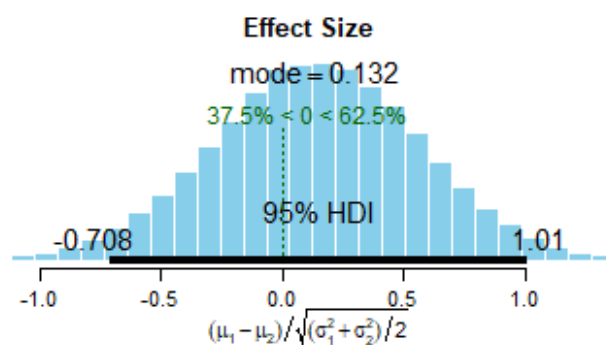

Group 1 = Test day 8  
Group 2: Test day 14

Number of Push ups

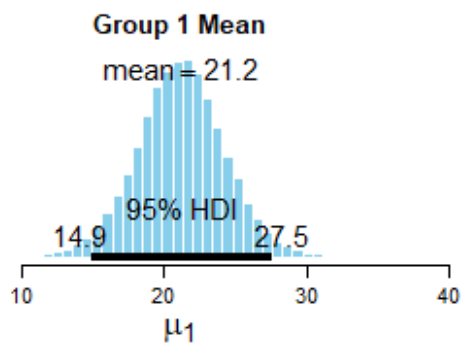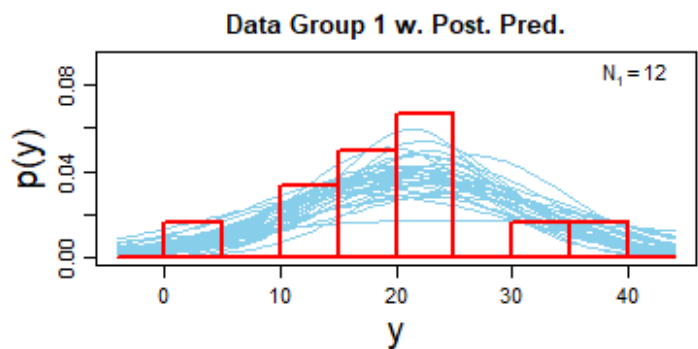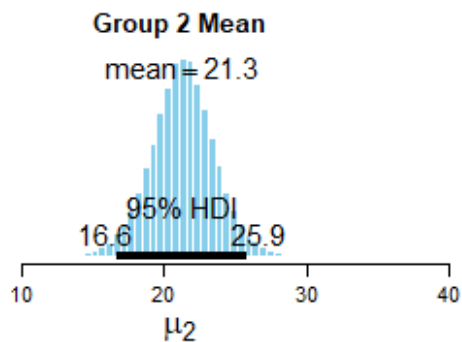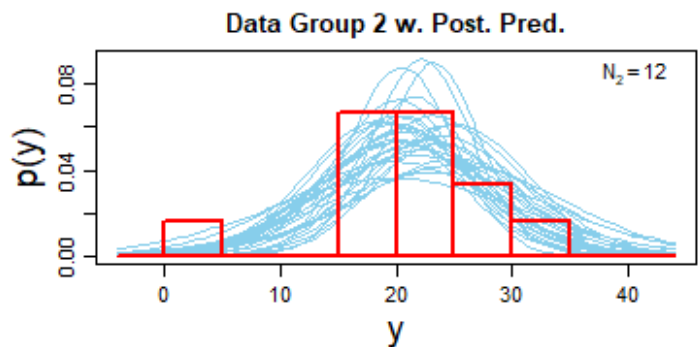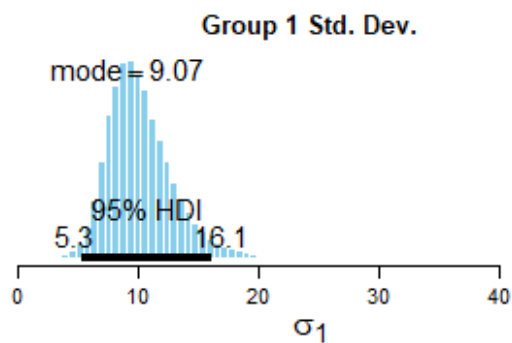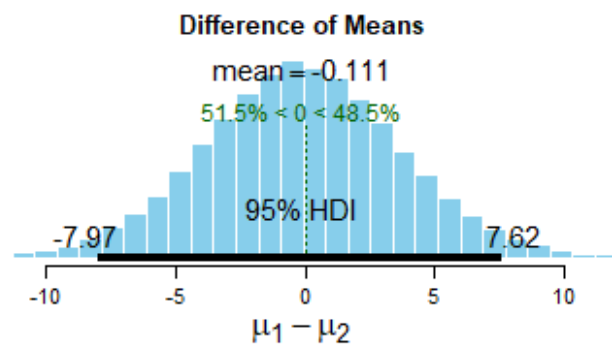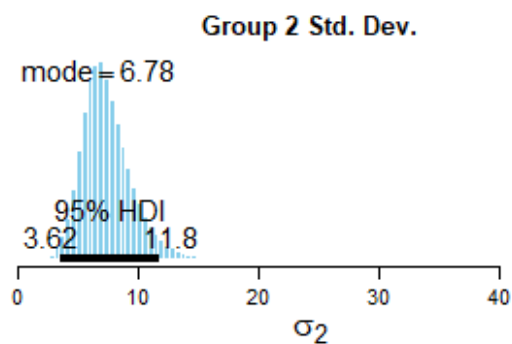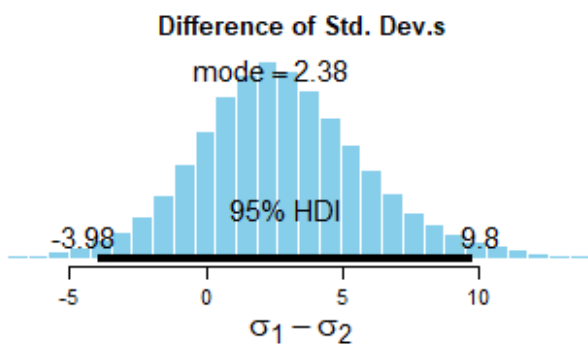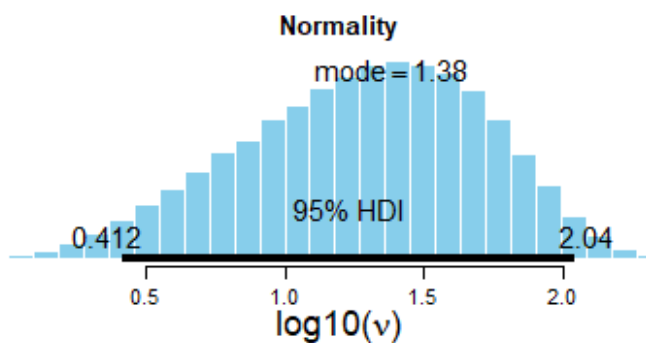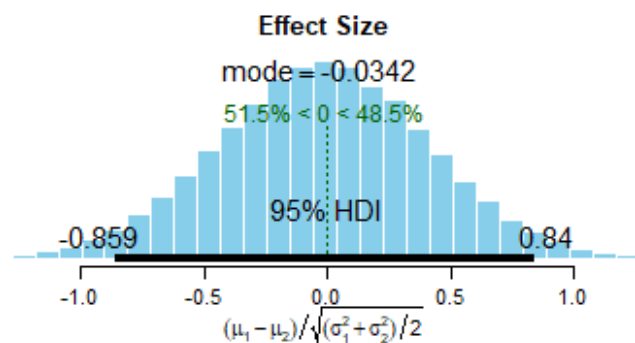

Group 1 = Test day 2  
Group 2: Test day 8

Number of Push ups

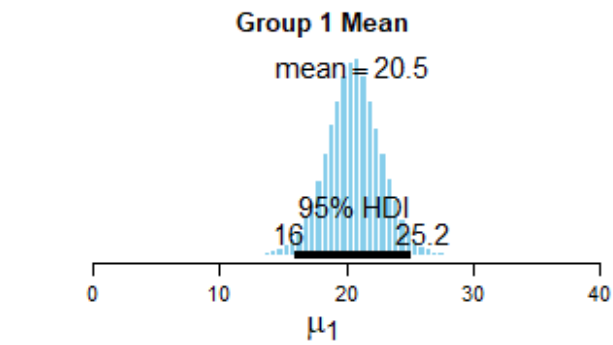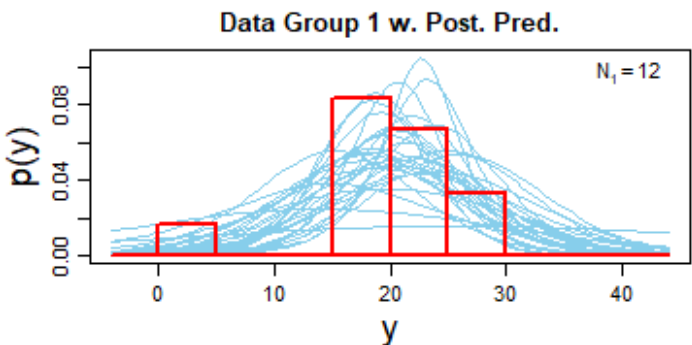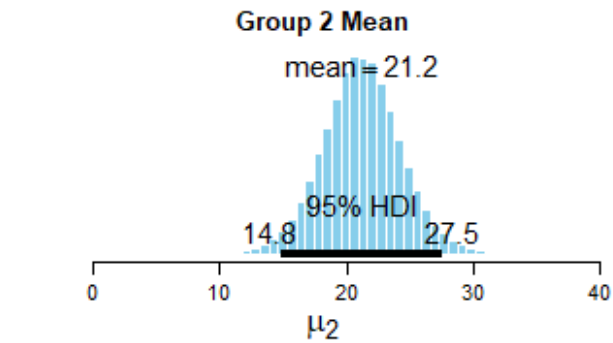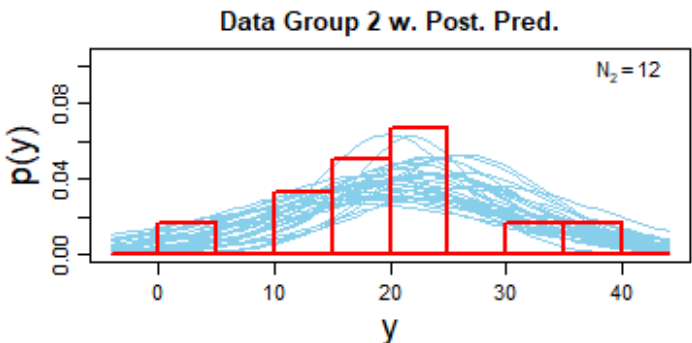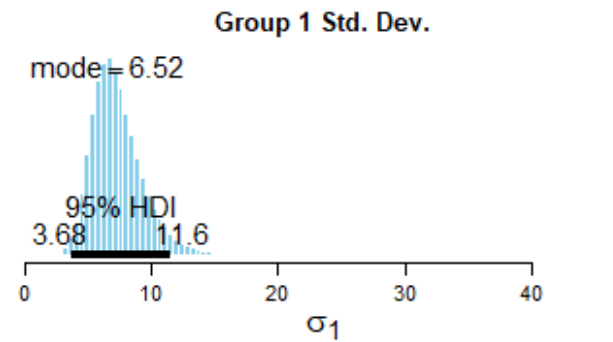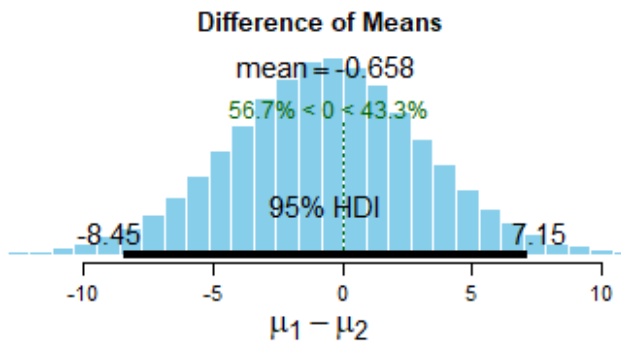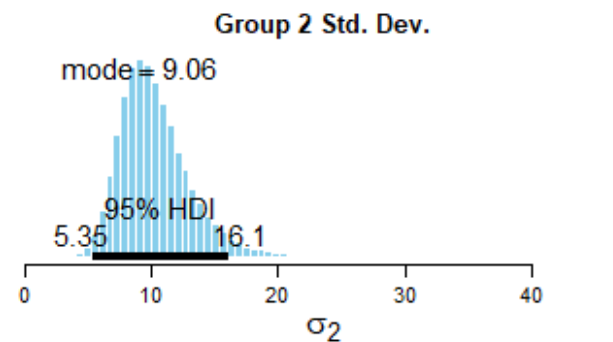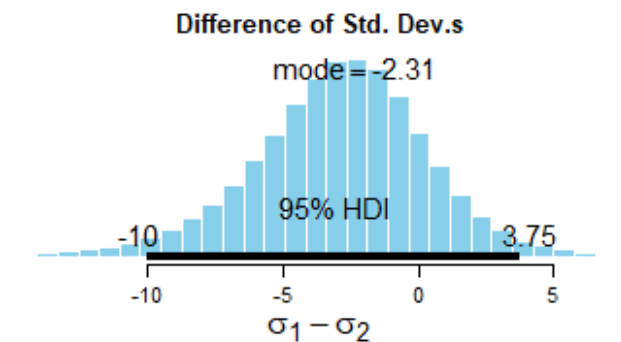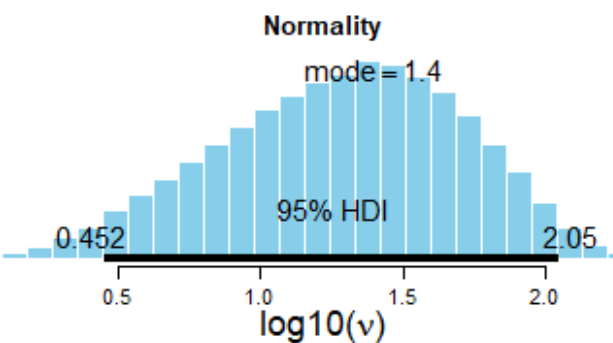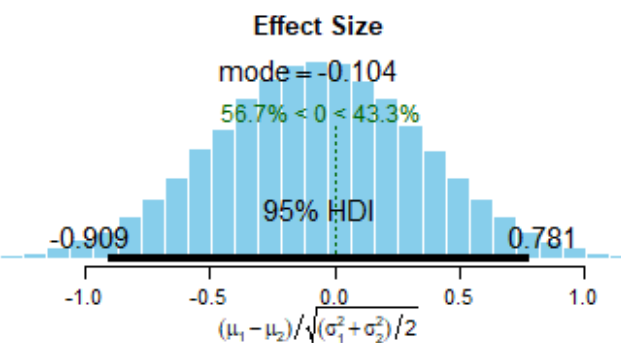

Group 1 = Test day 2  
Group 2: Test day 21

Number of Push ups

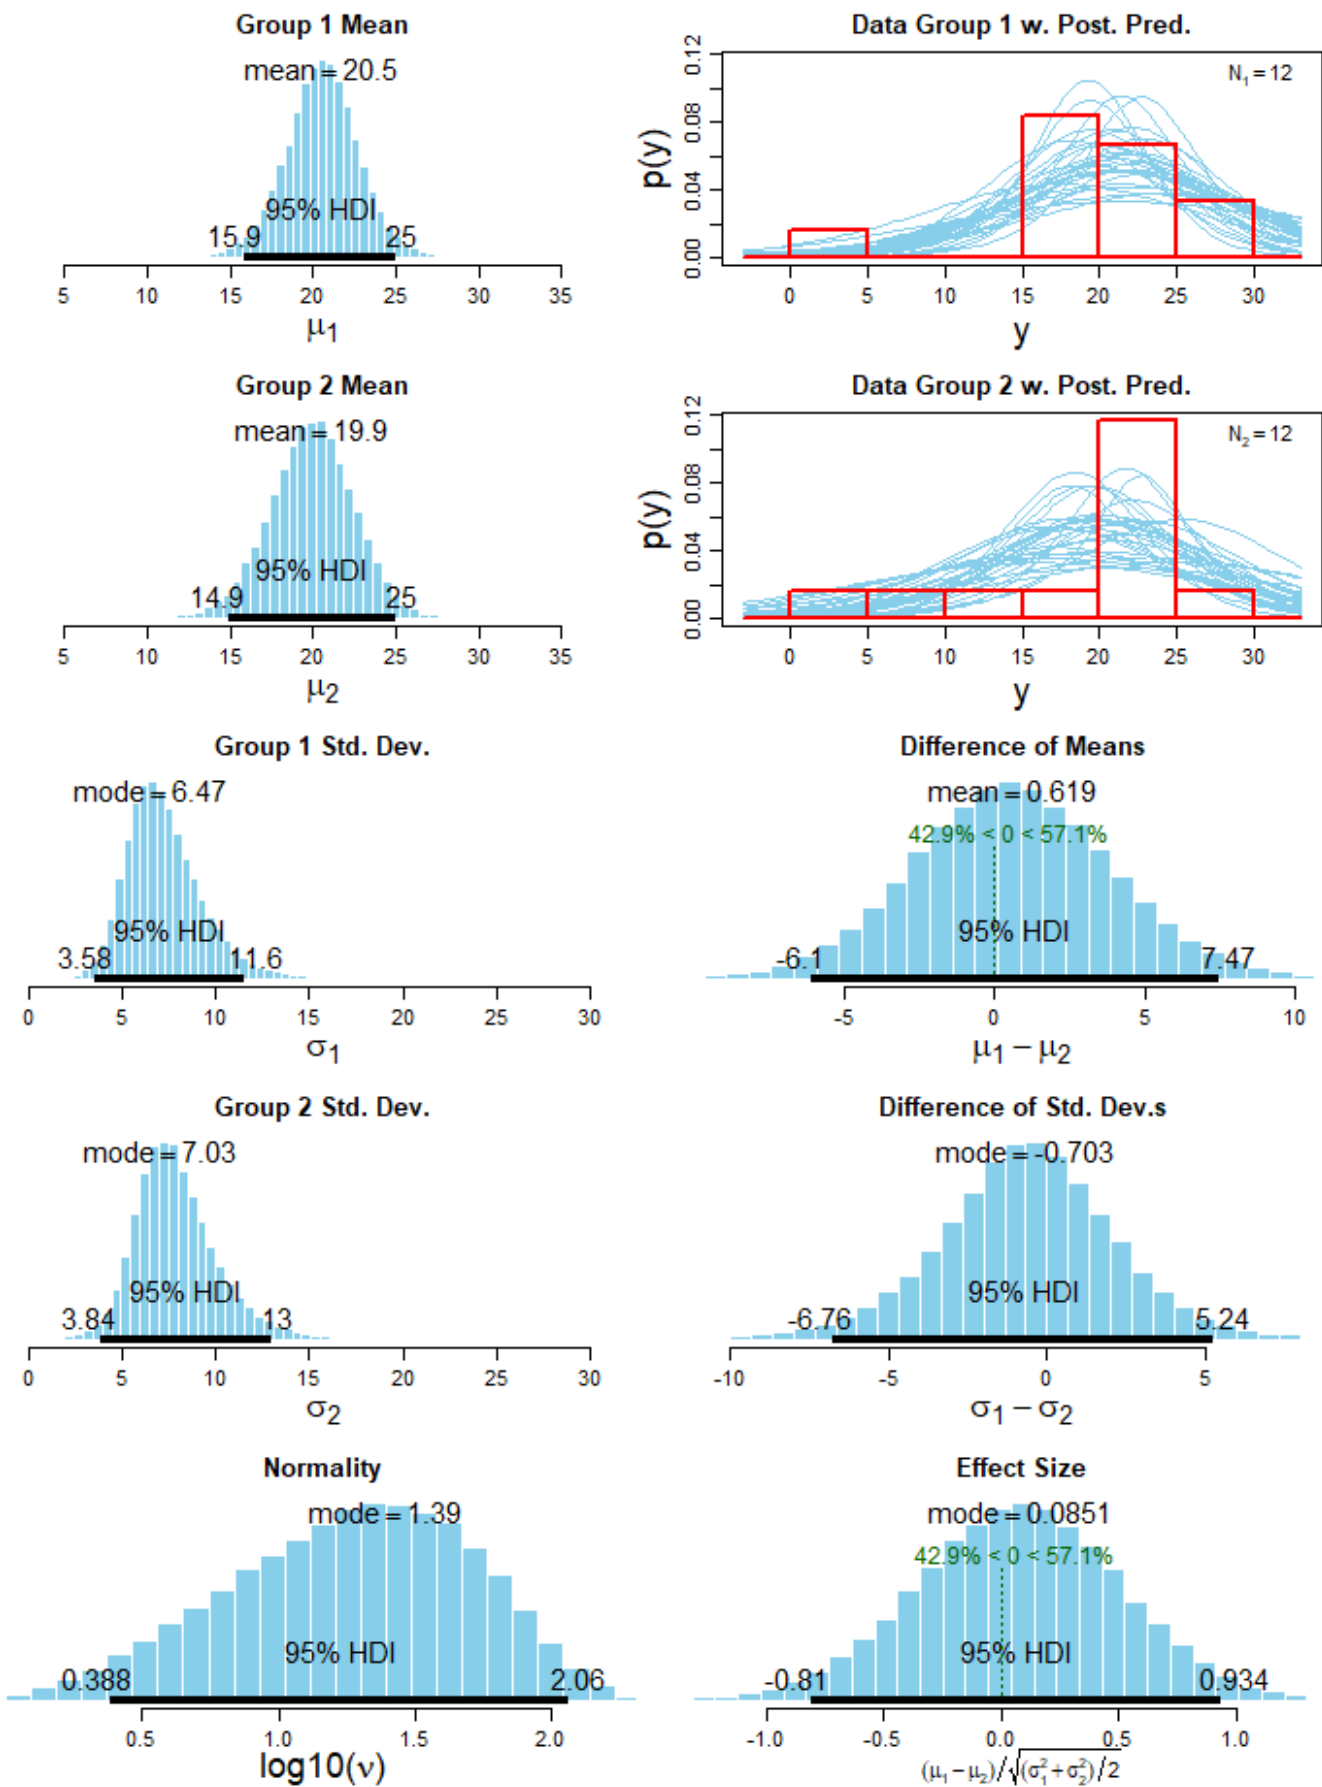

Group 1 = Test day 2  
 Group 2: Test day 14

Number of Push ups

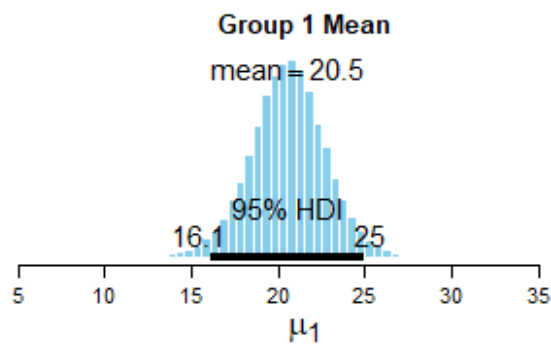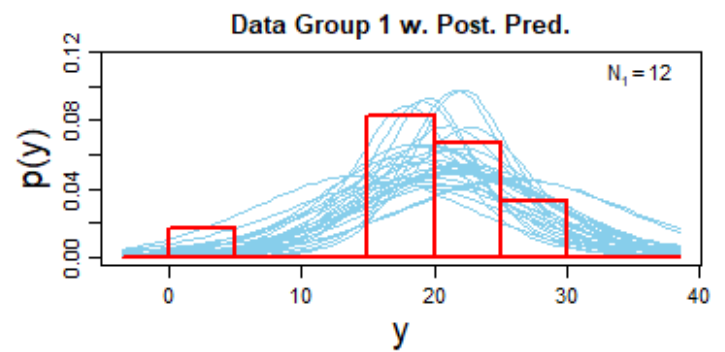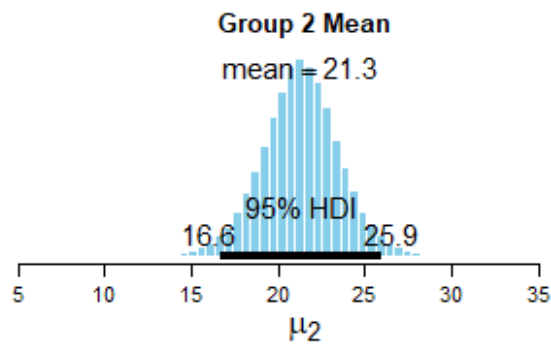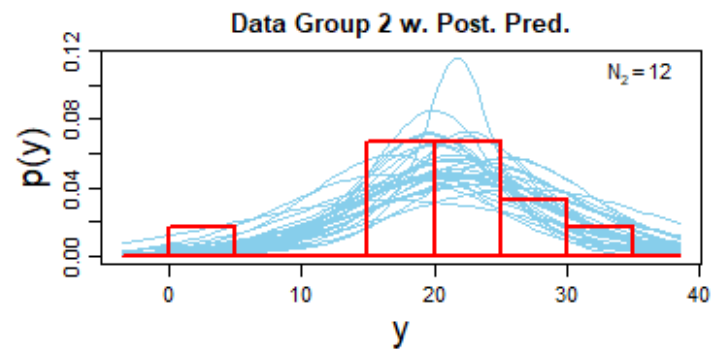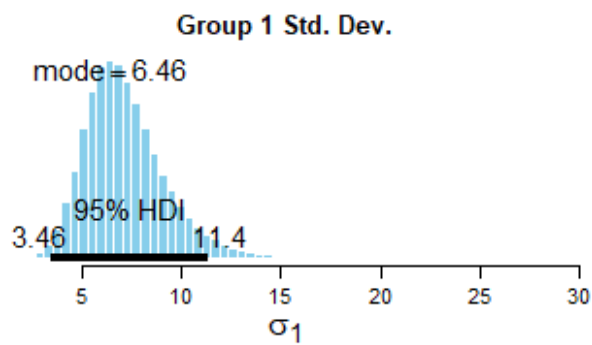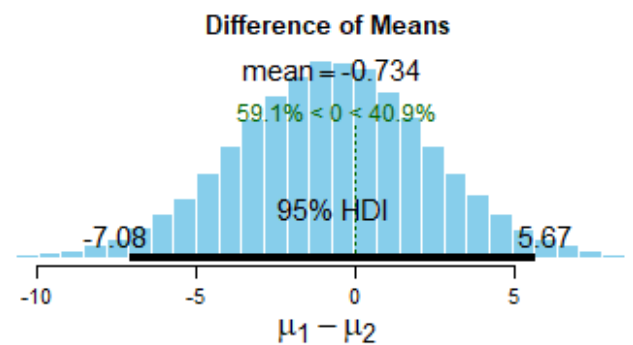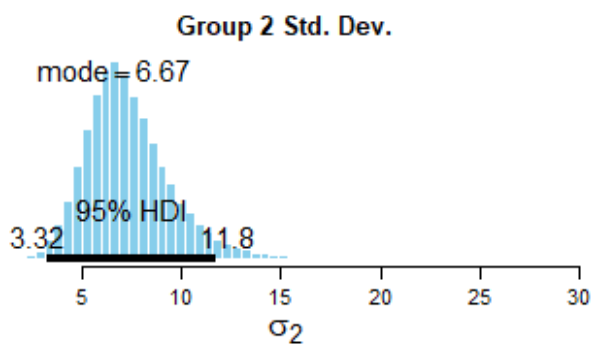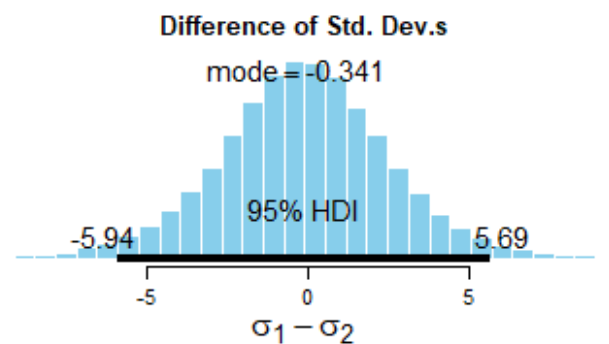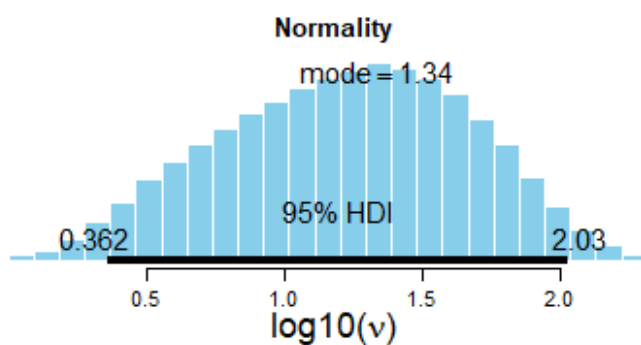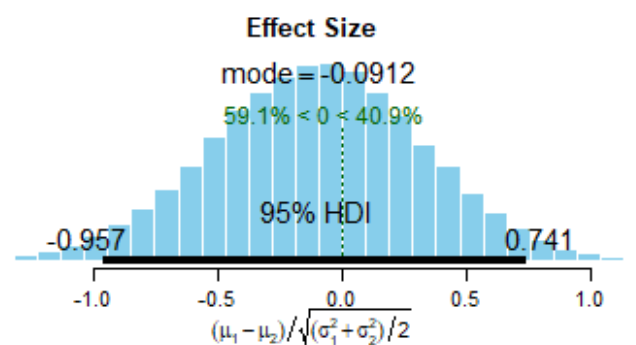

Group 1 = Test day 14

Number of Push ups

Group 2: Test day 21

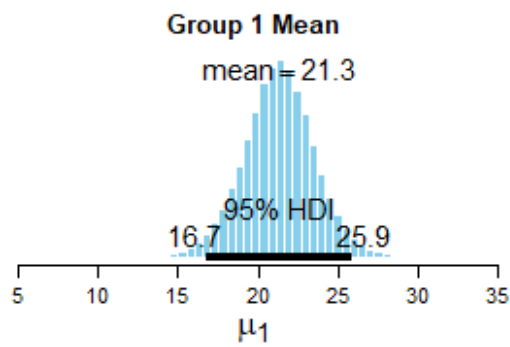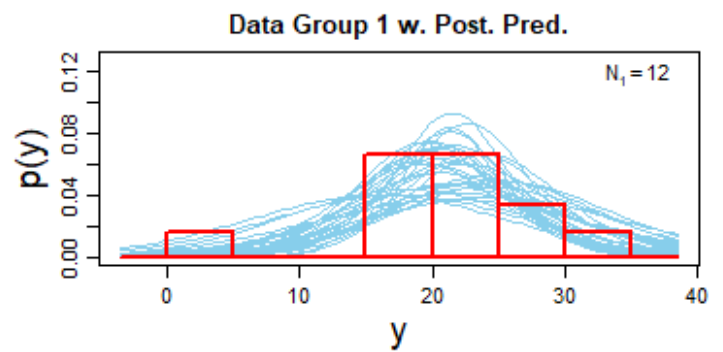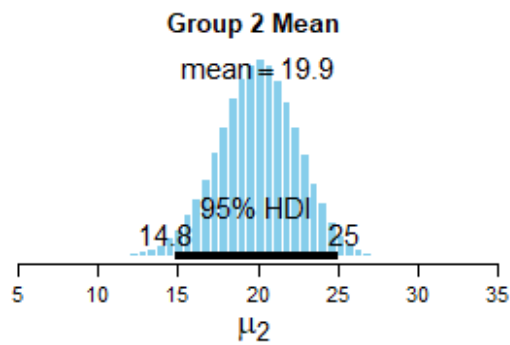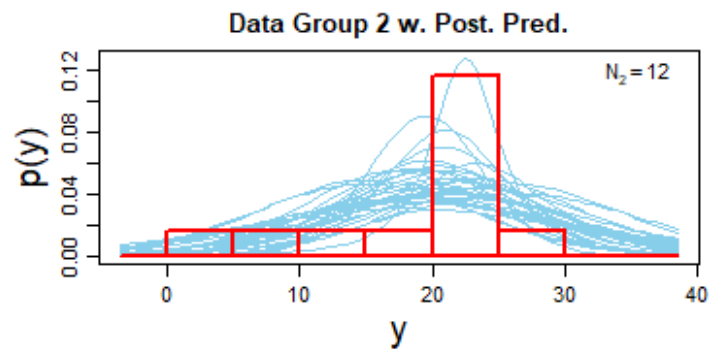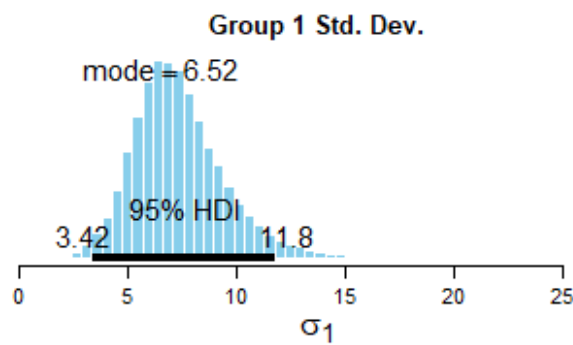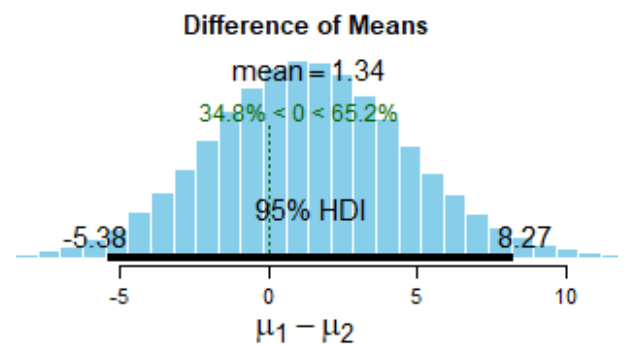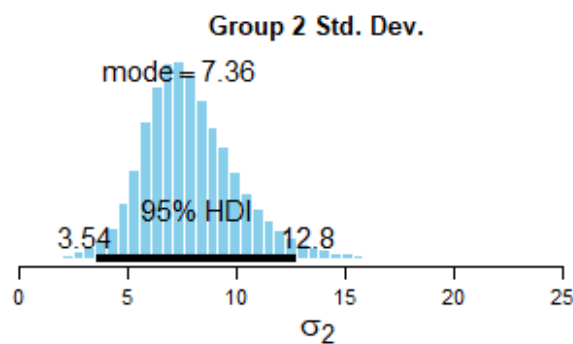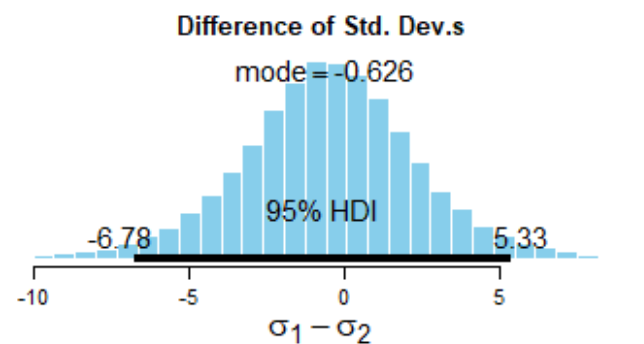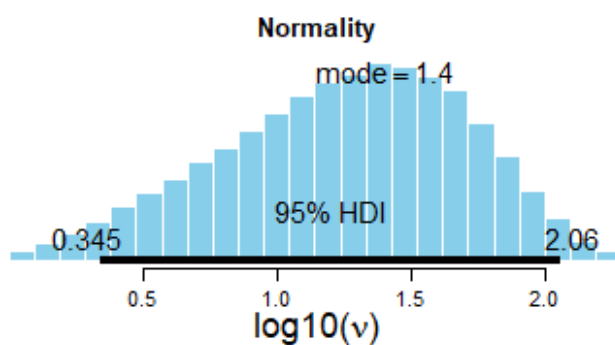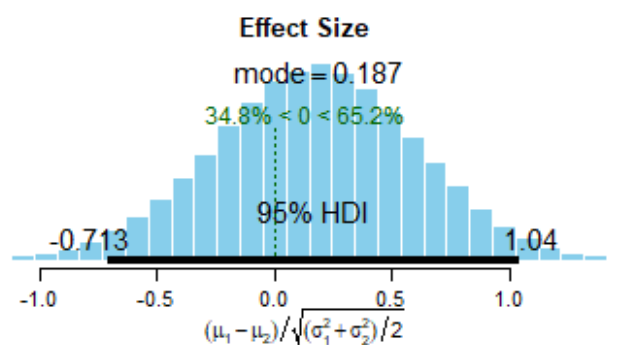



Group 1 = Test day 8

Group 2: Test day 21

Number of Leg press

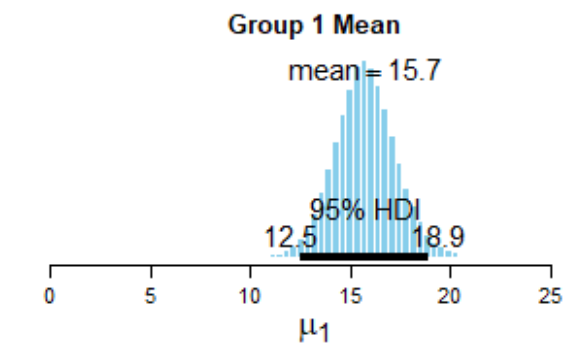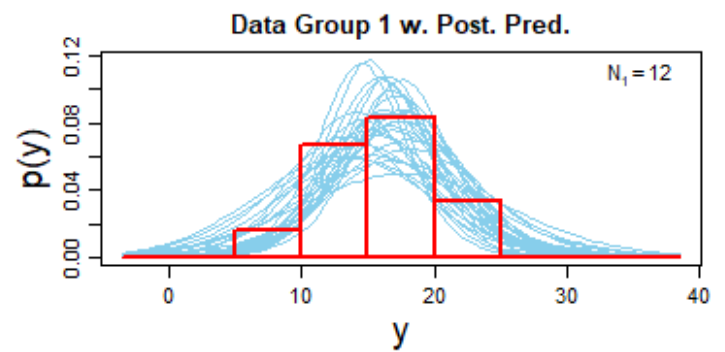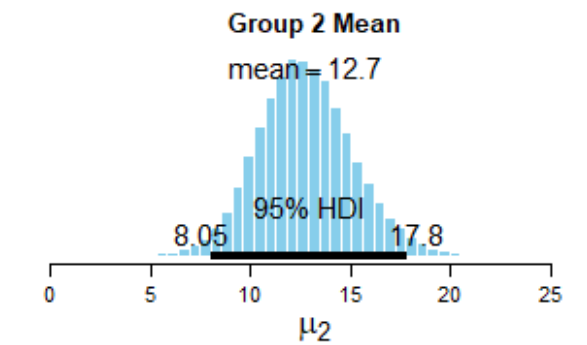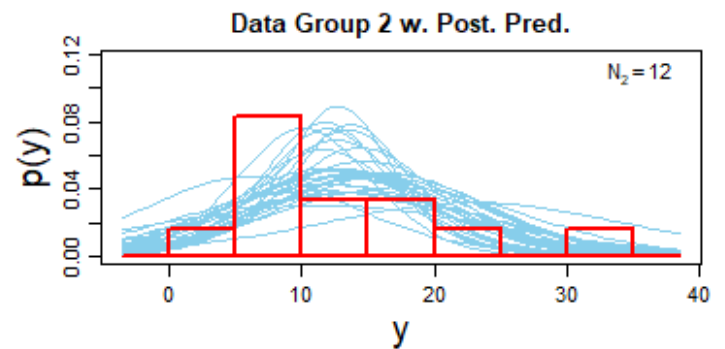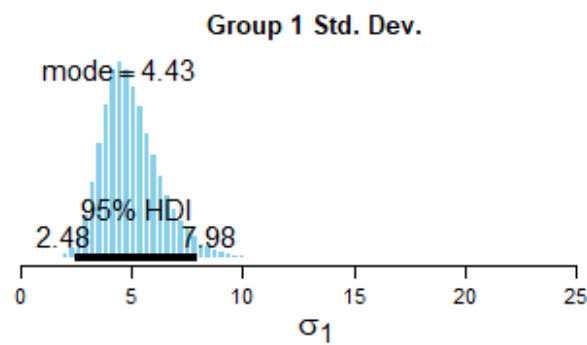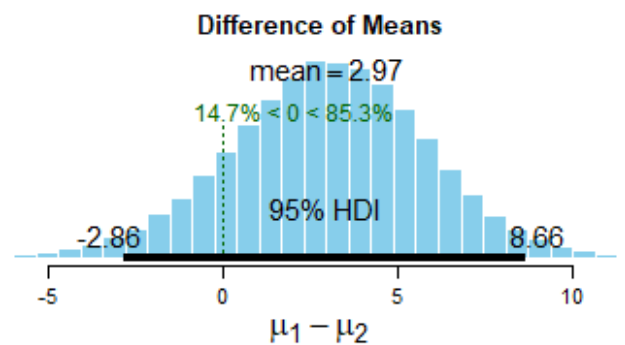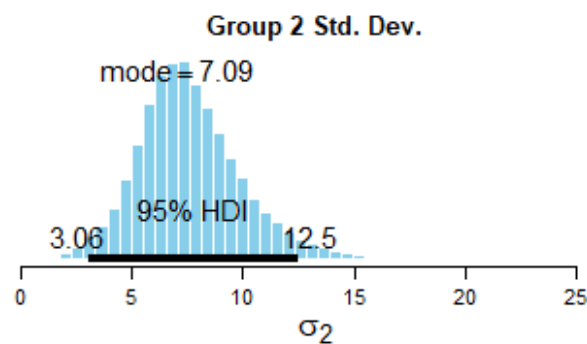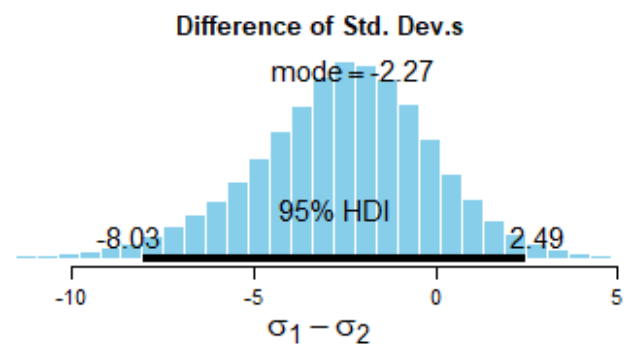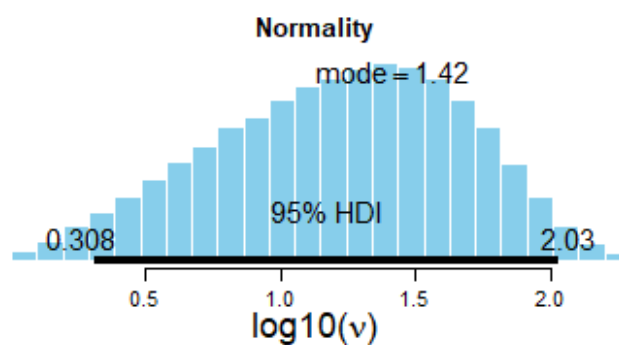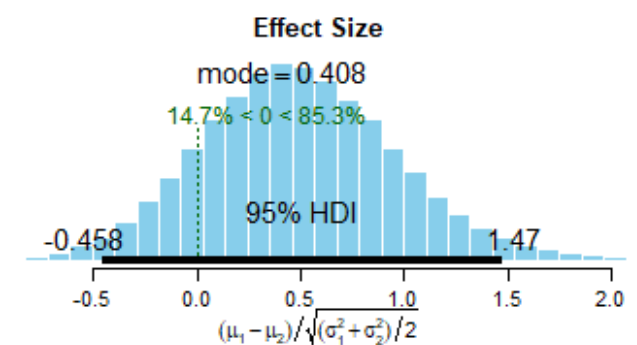

Group 1 = Test day 8  
Group 2: Test day 14

Number of Leg press

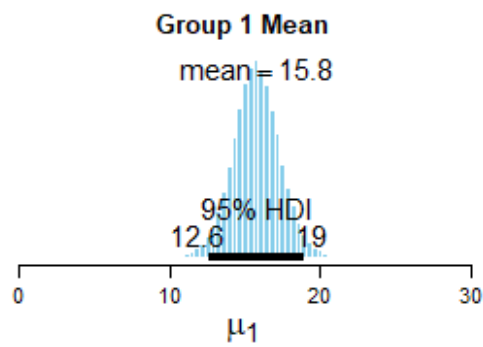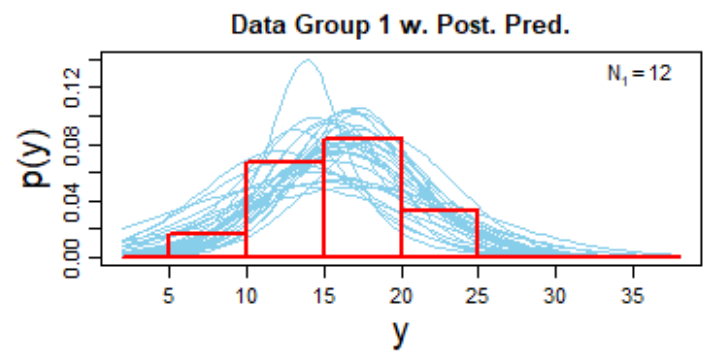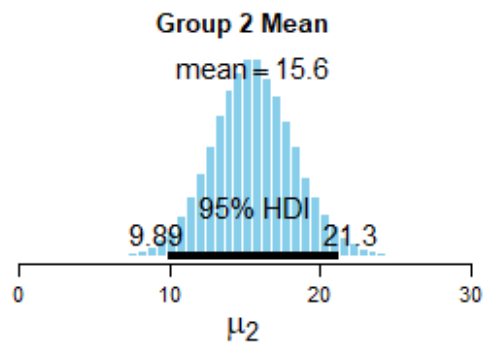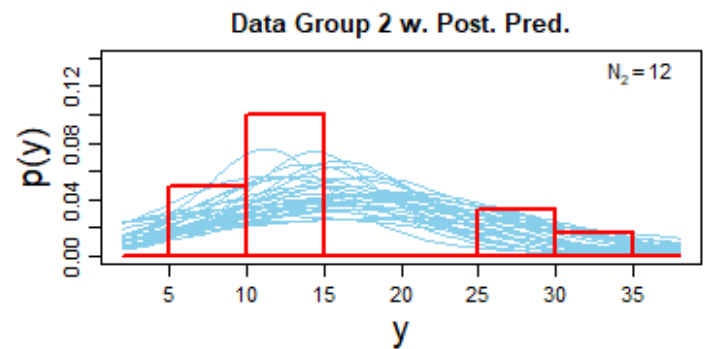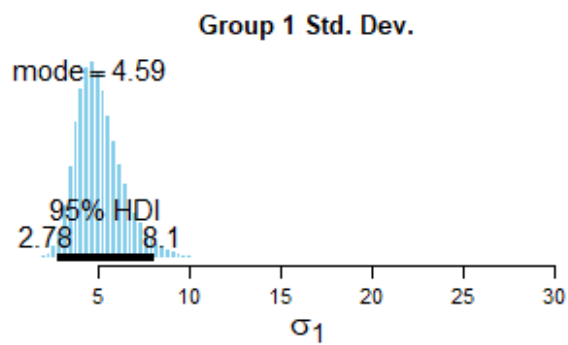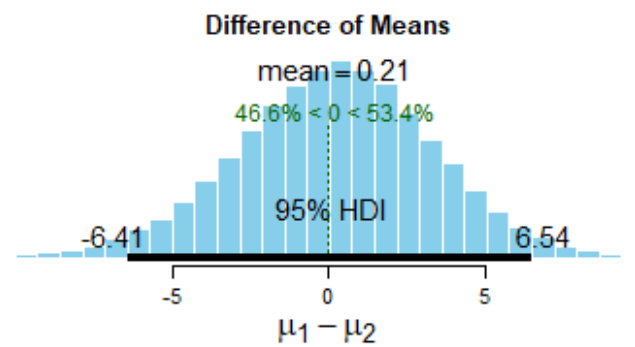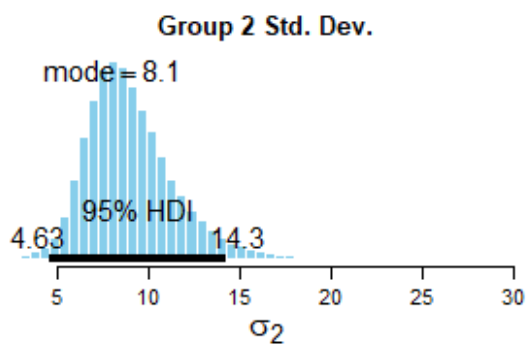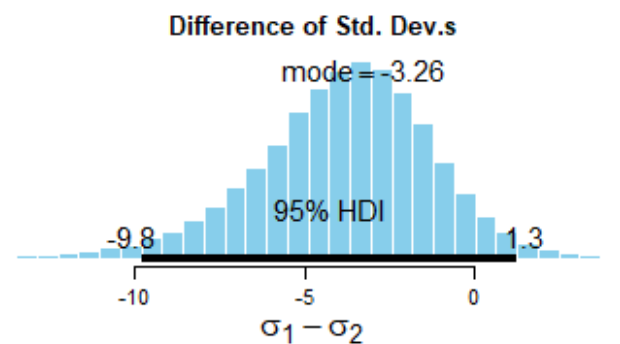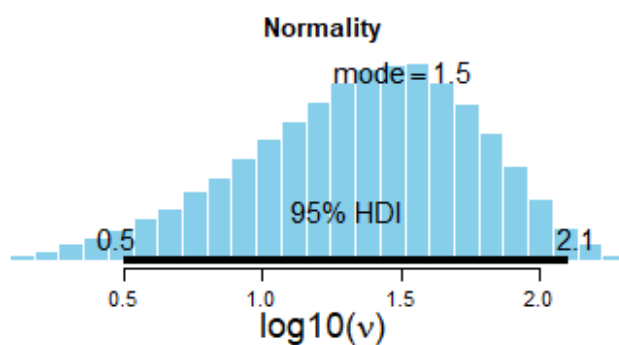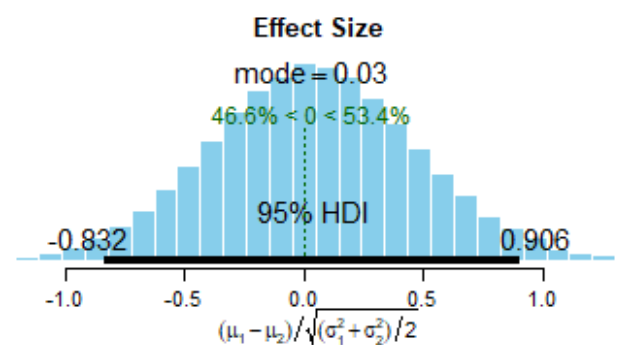

Group 1 = Test day 2  
Group 2: Test day 8

Number of Leg press

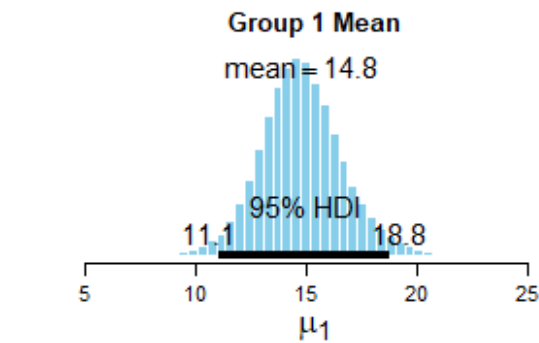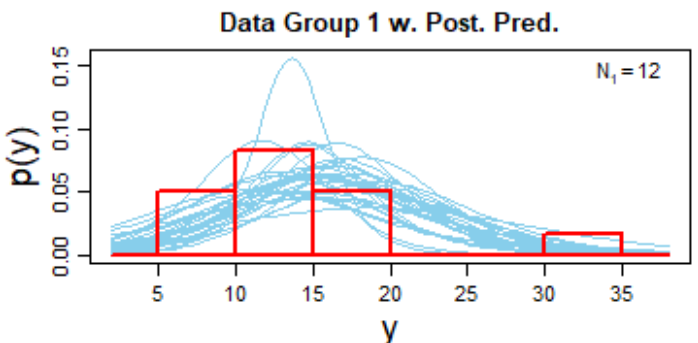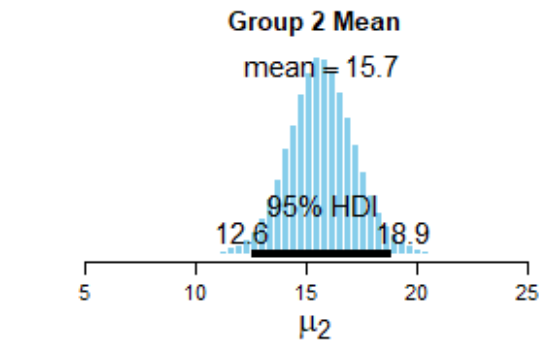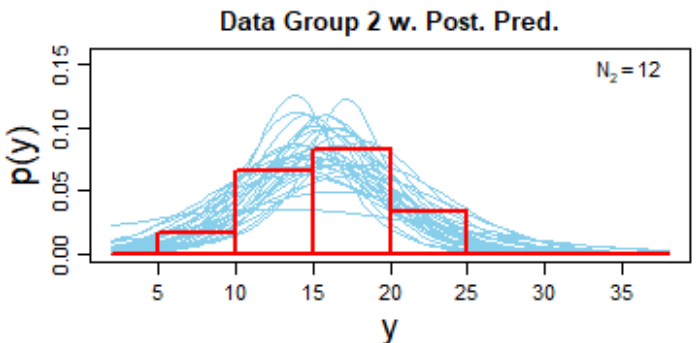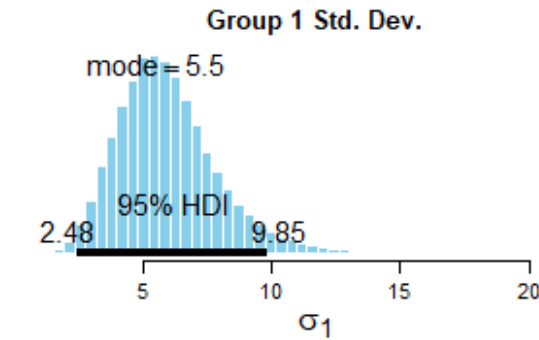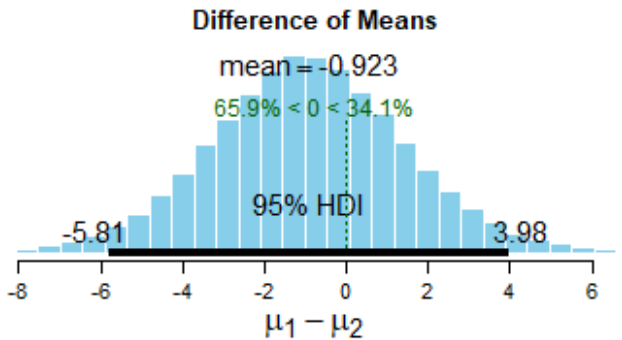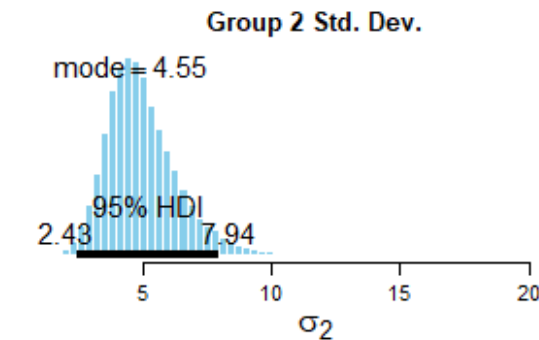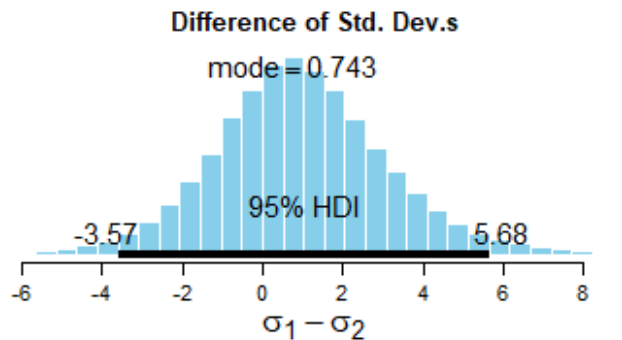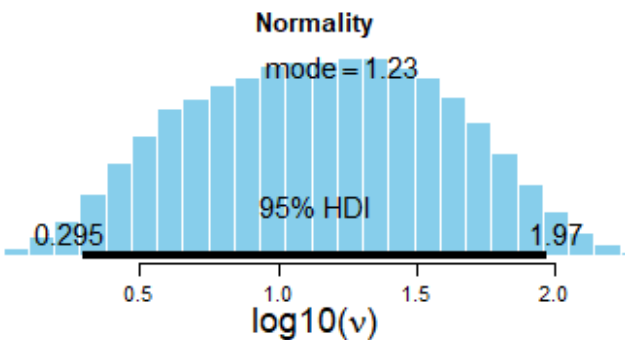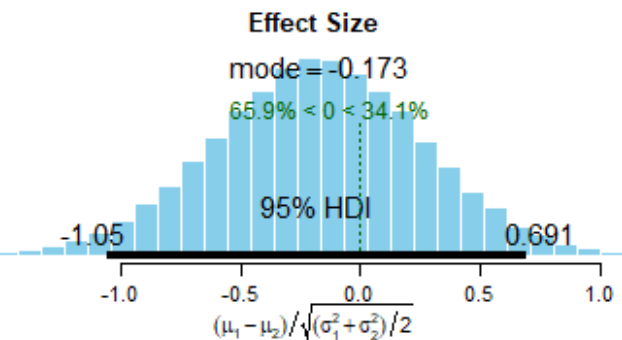

Group 1 = Test day 2  
Group 2: Test day 21

Number of Leg press

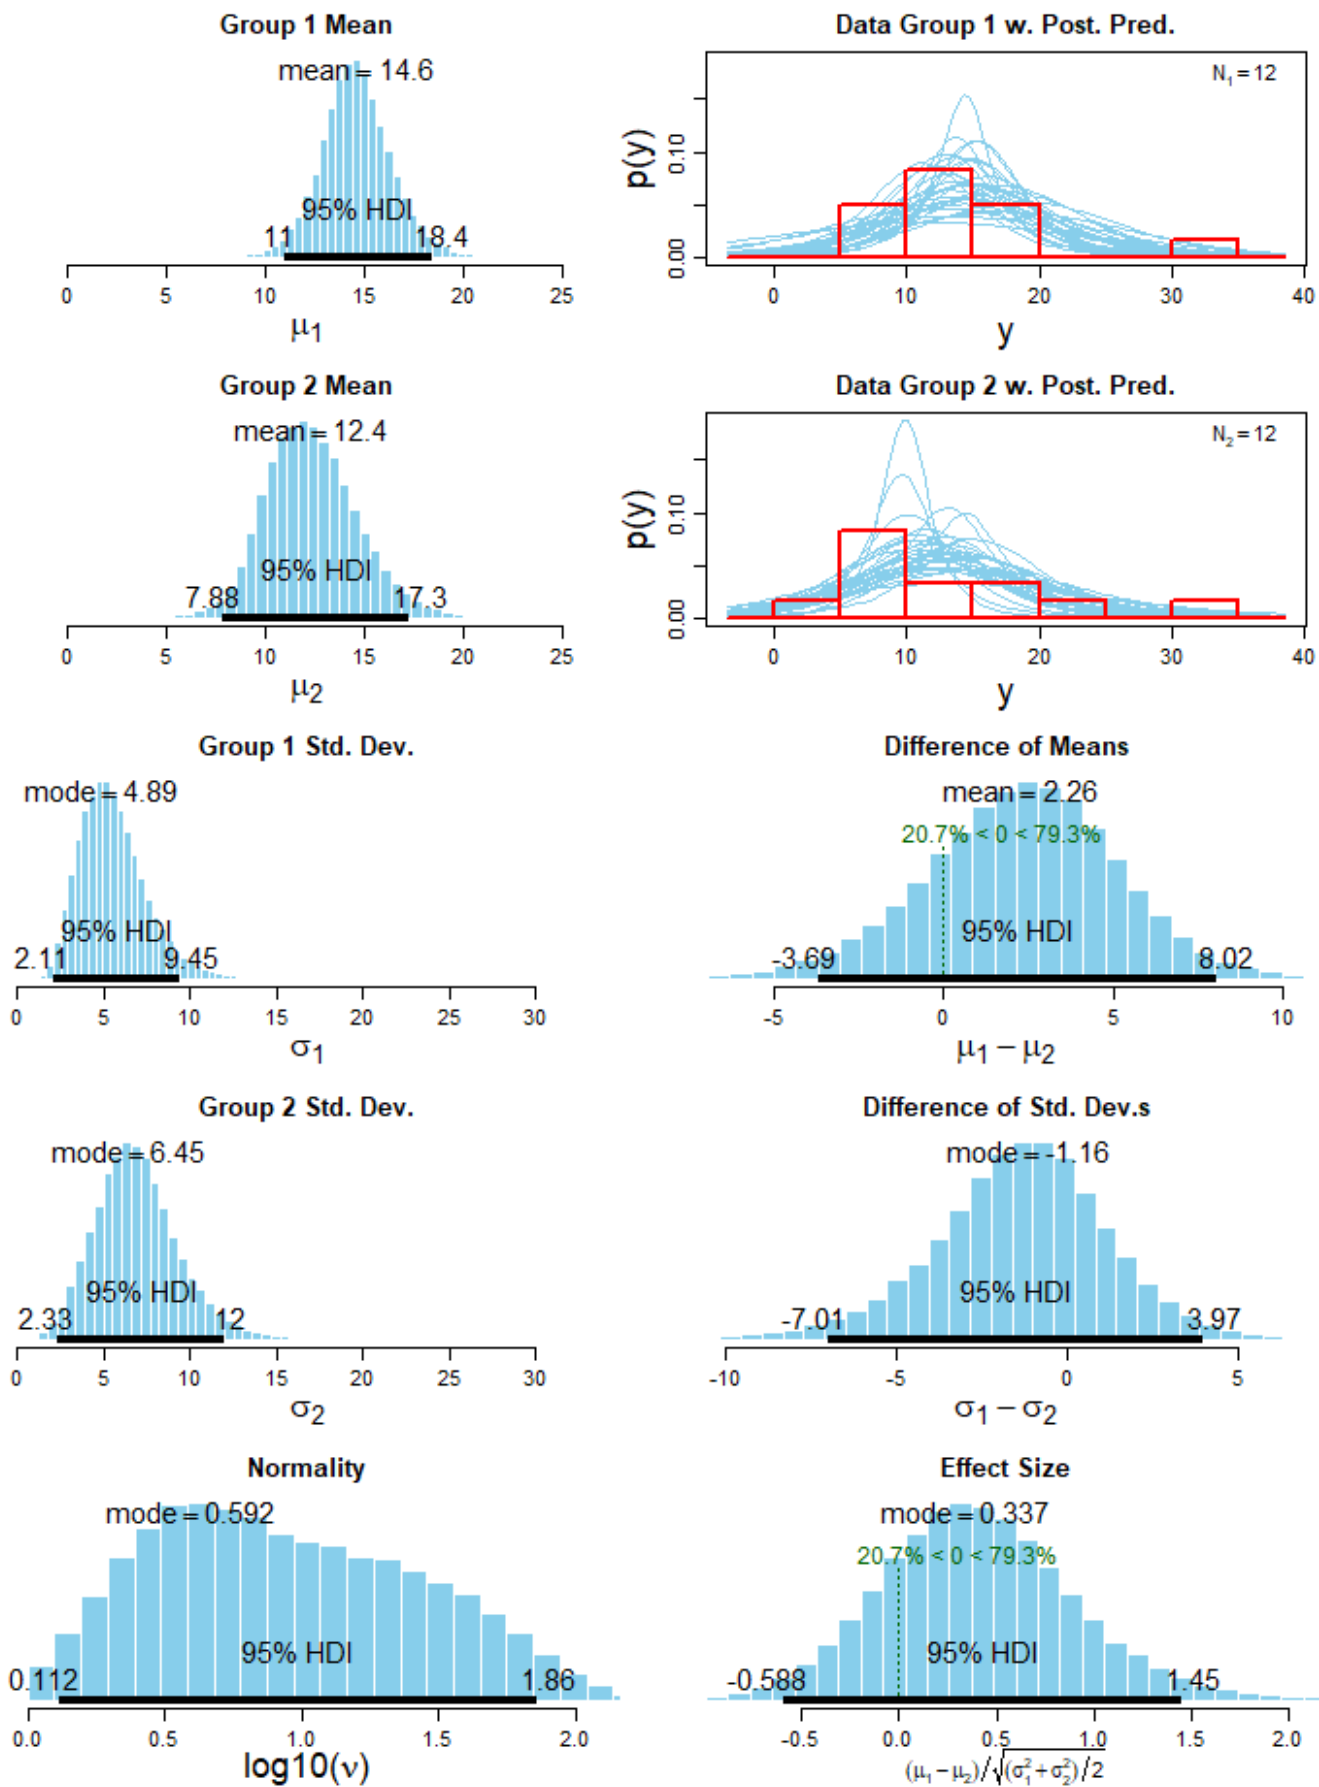

Group 1 = Test day 2

Group 2: Test day 14

Number of Leg press

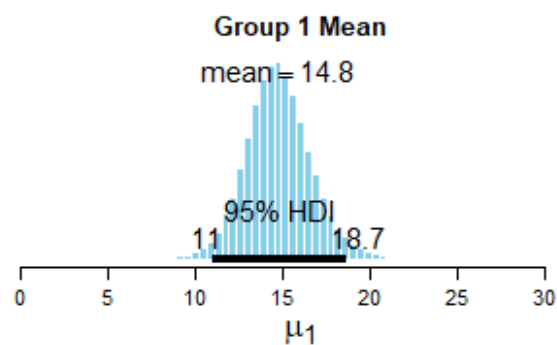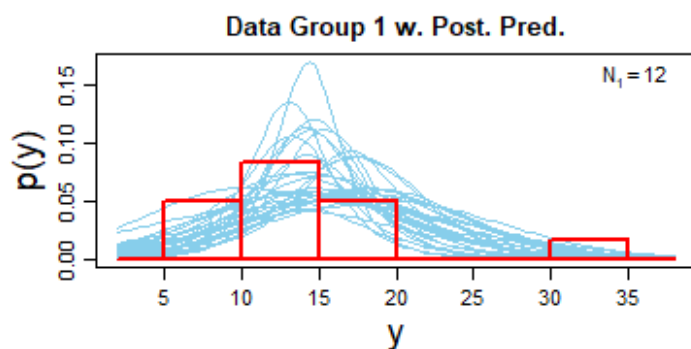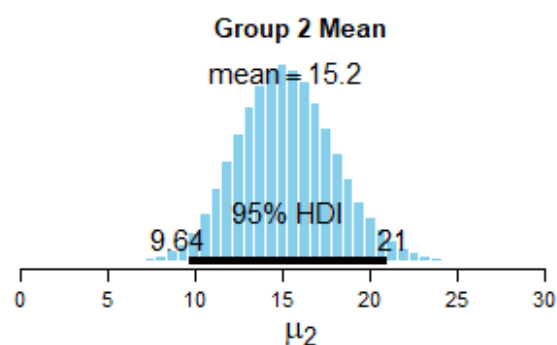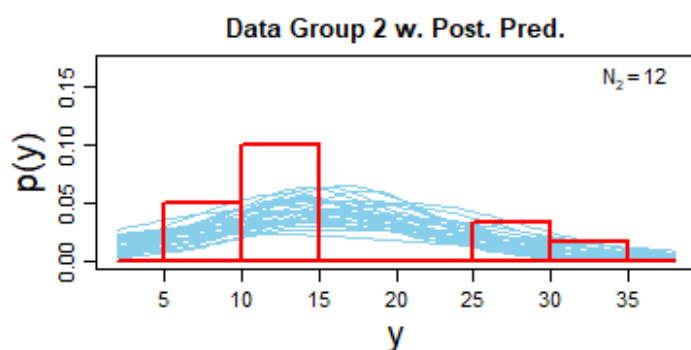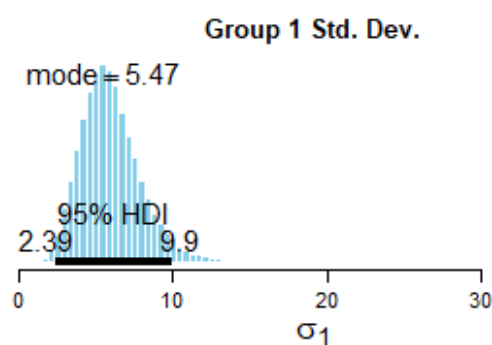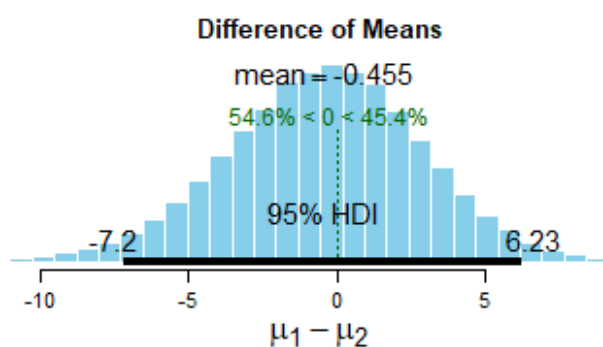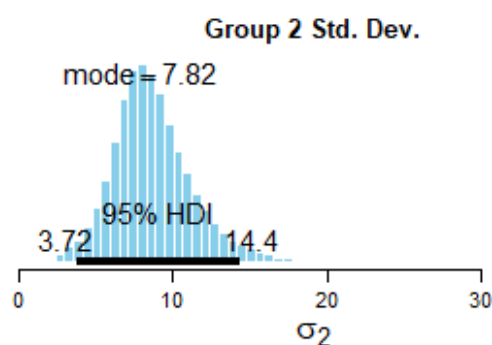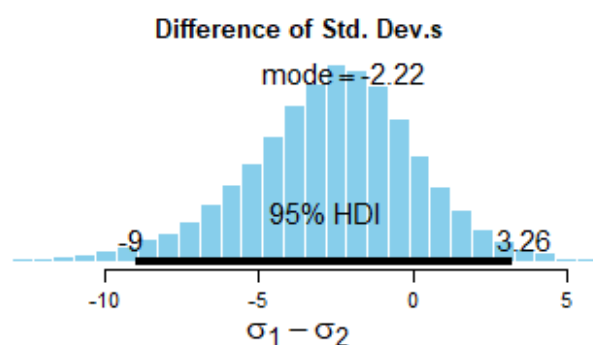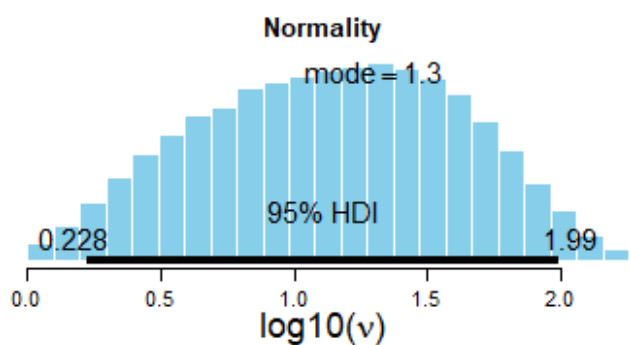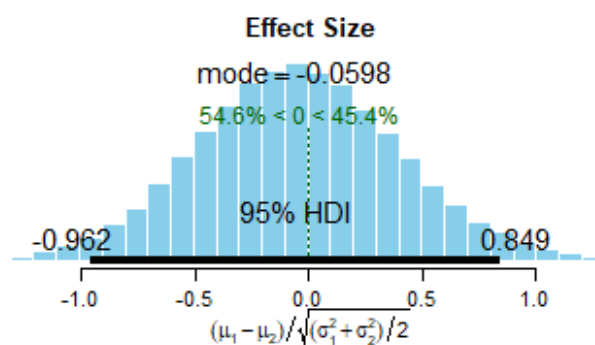

Group 1 = Test day 14  
Group 2: Test day 21

Number of Leg press

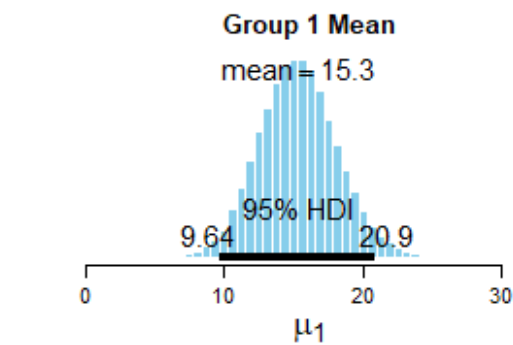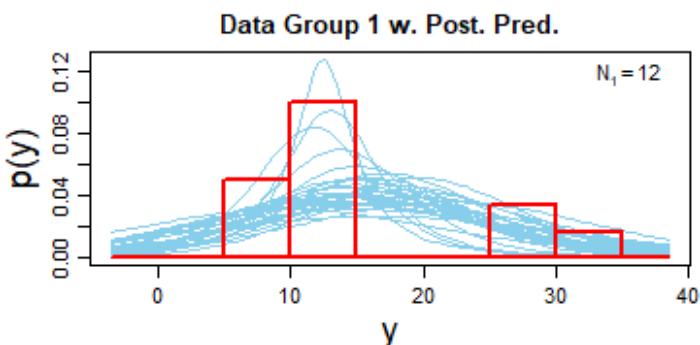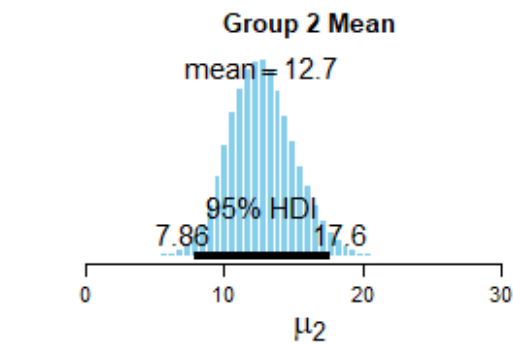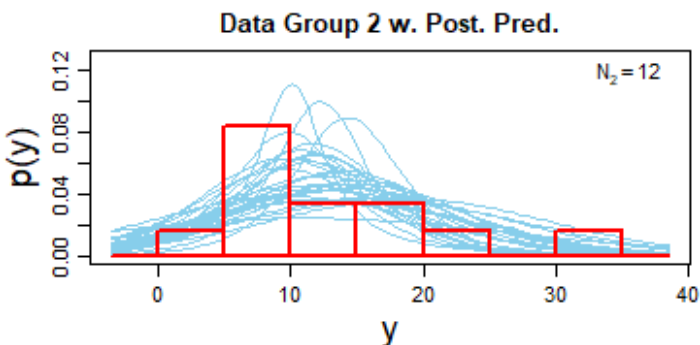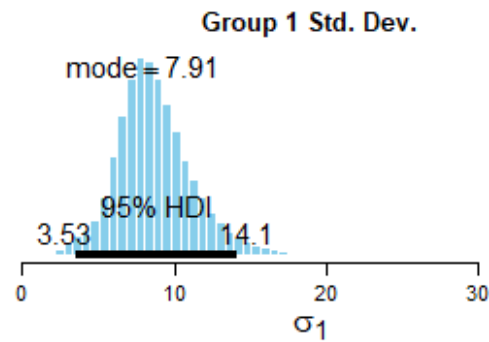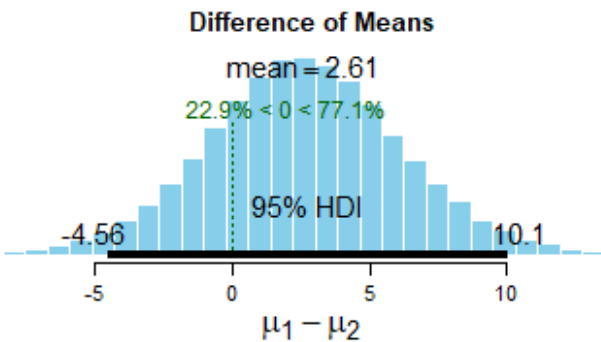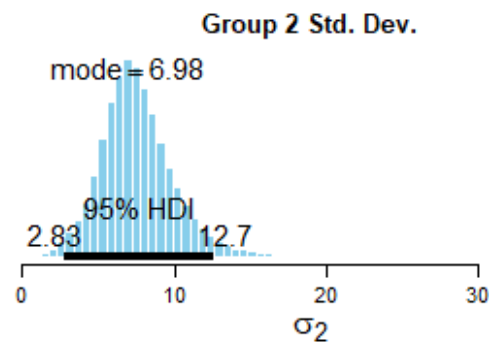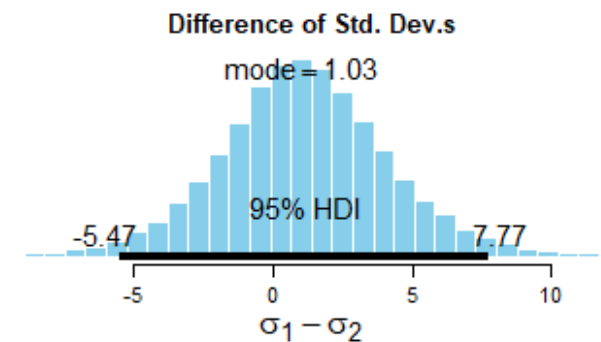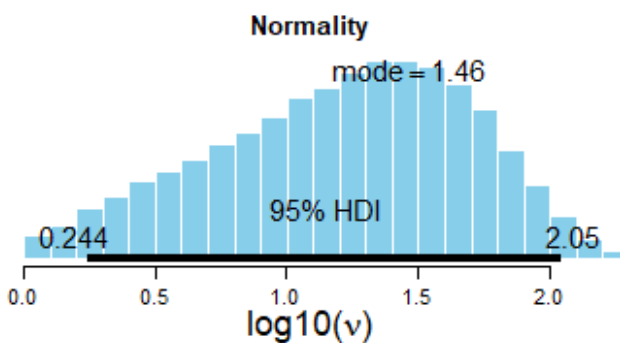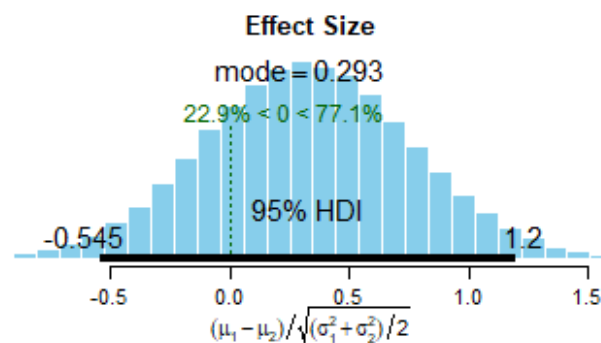

Group 1 = Test day 8  
Group 2: Test day 21

Time 1600 m in seconds

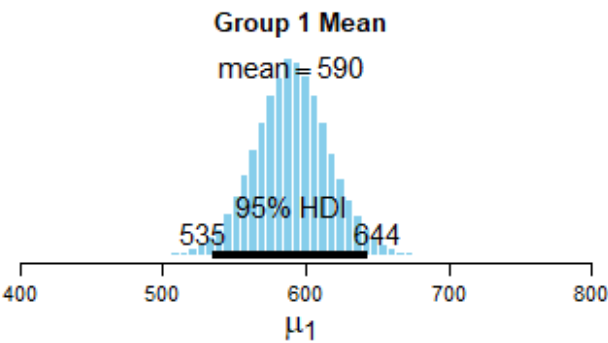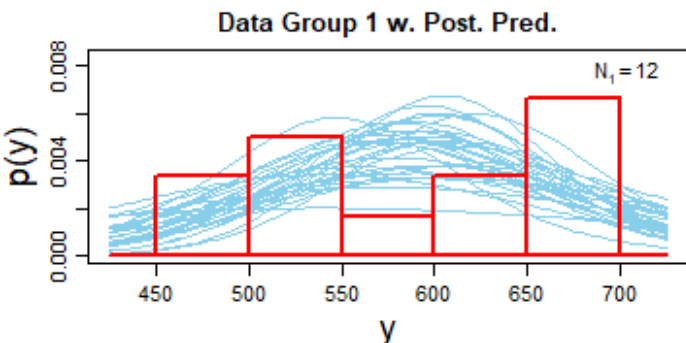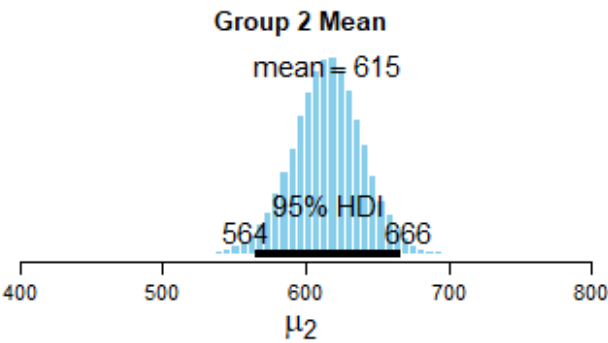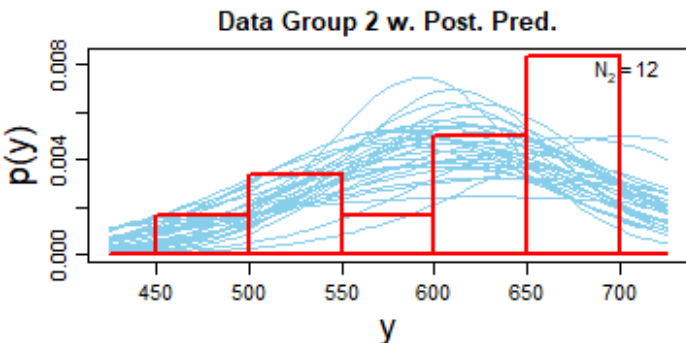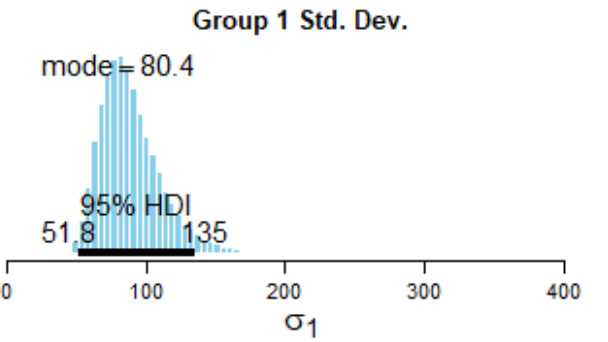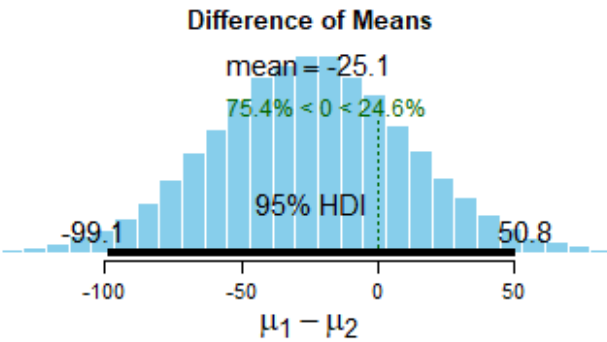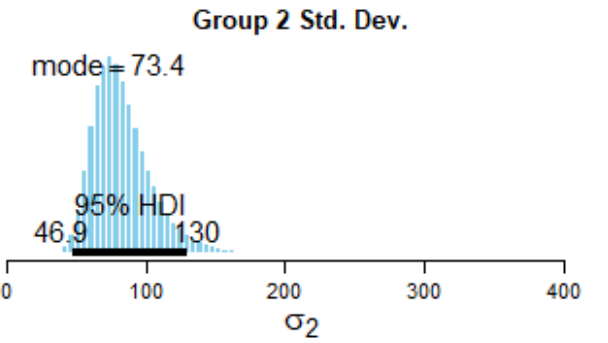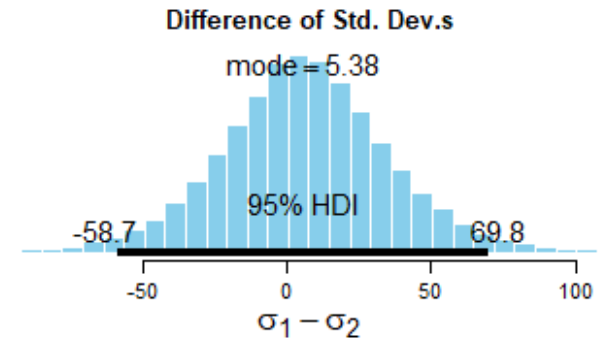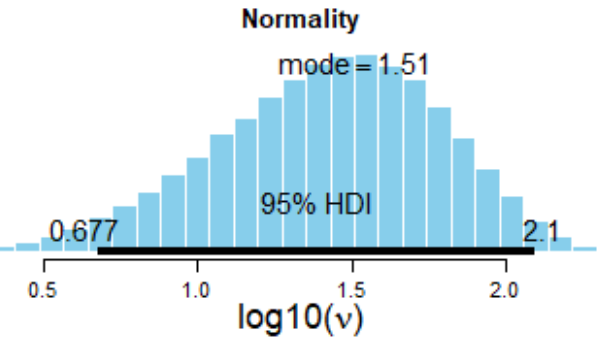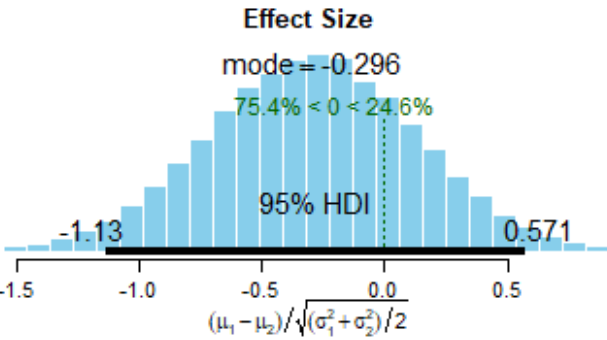

Group 1 = Test day 8  
Group 2: Test day 14

Time 1600 m in seconds

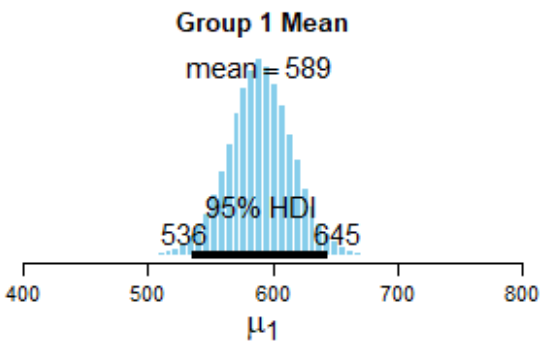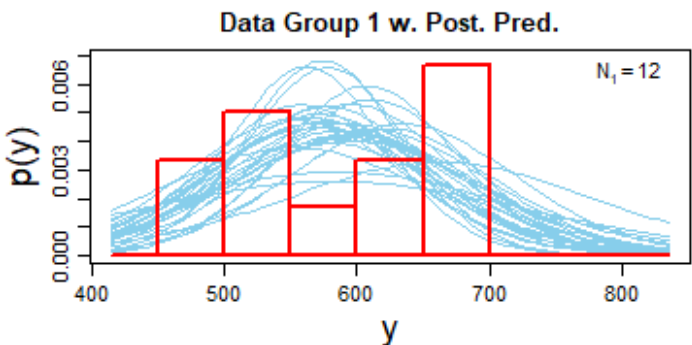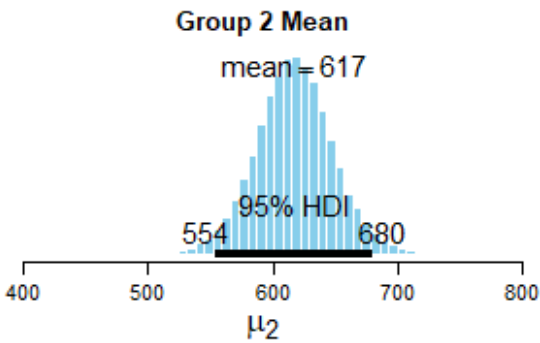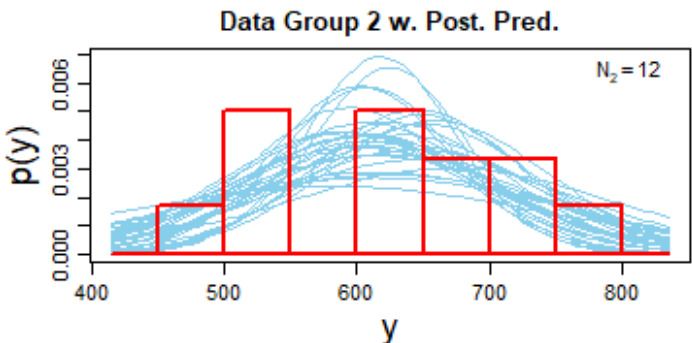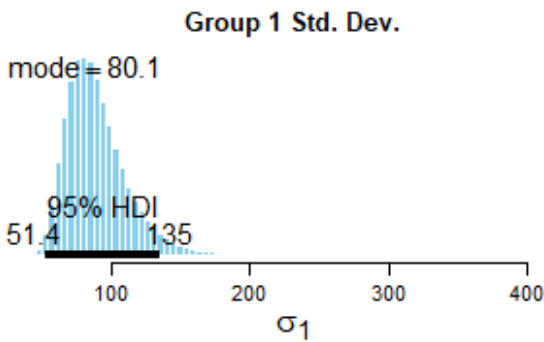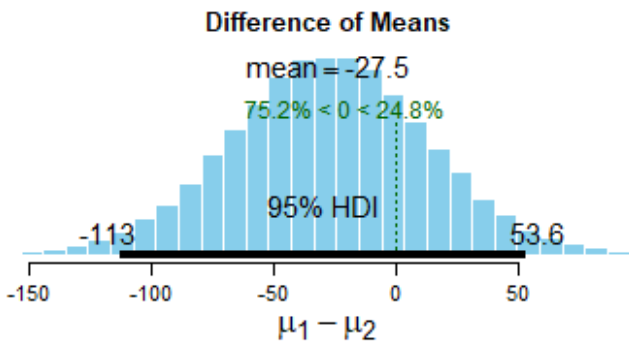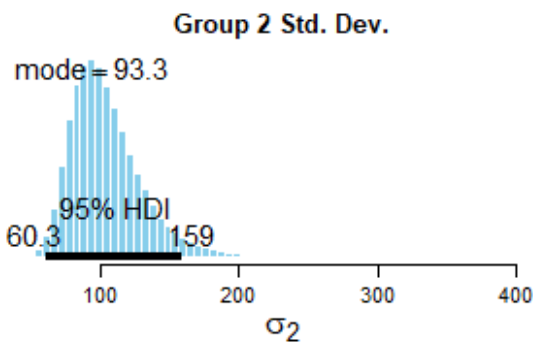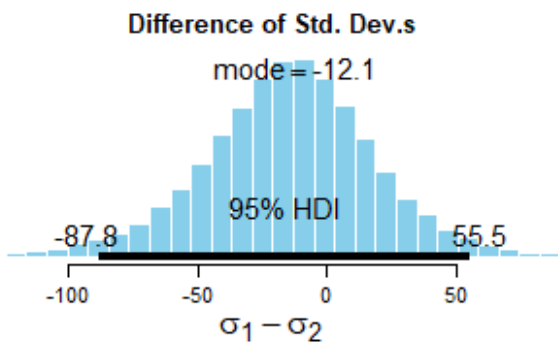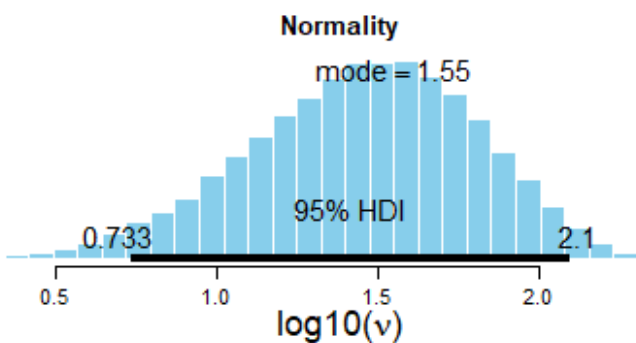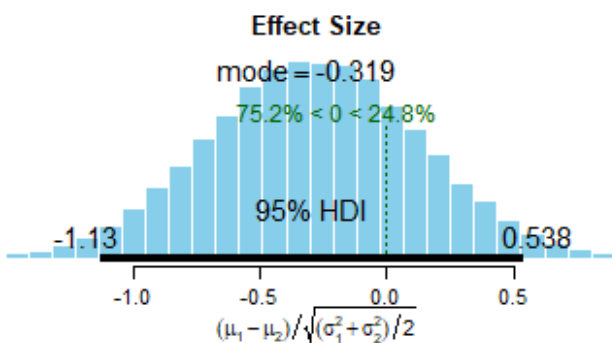



Group 1 = Test day 2

Group 2: Test day 8

Time 1600 m in seconds

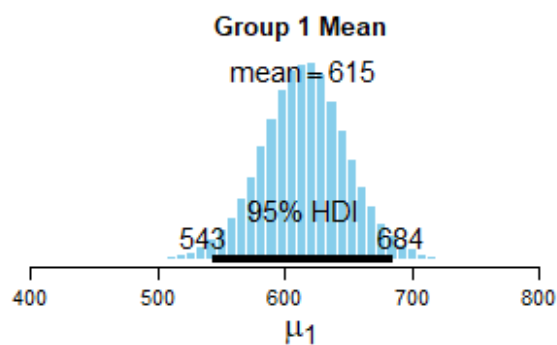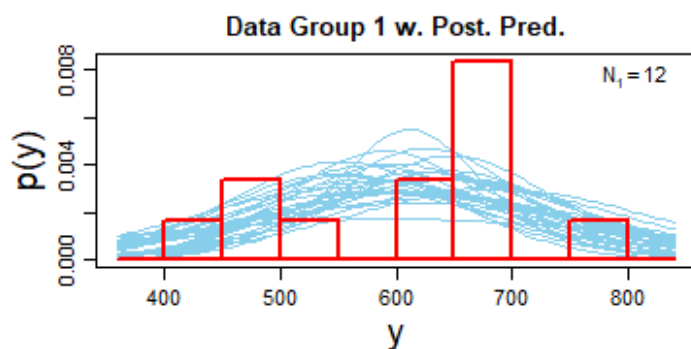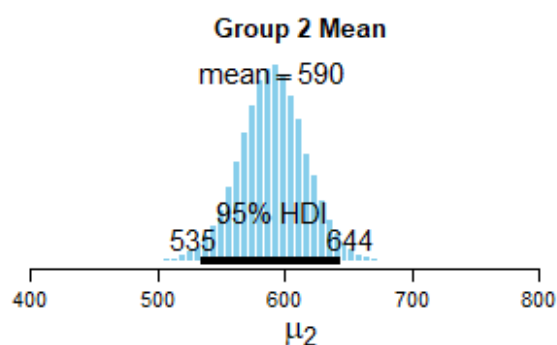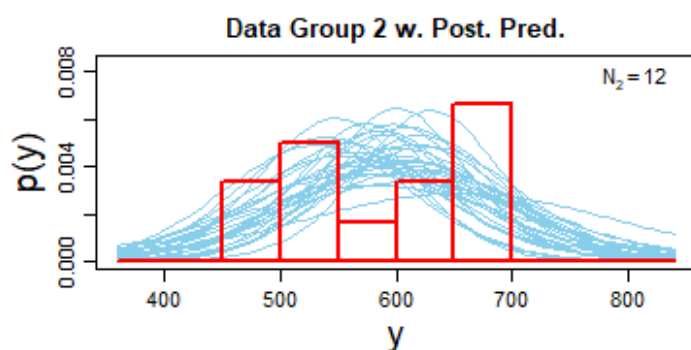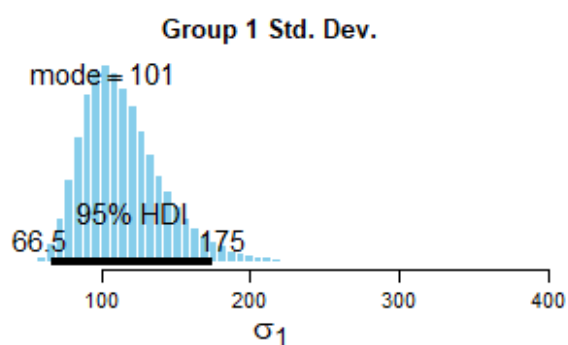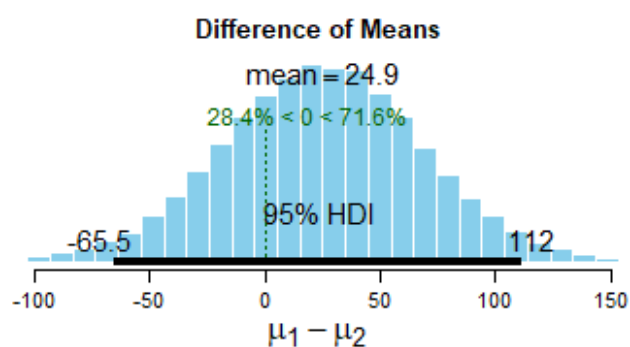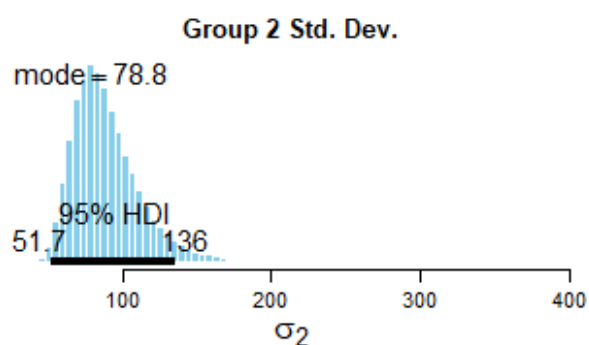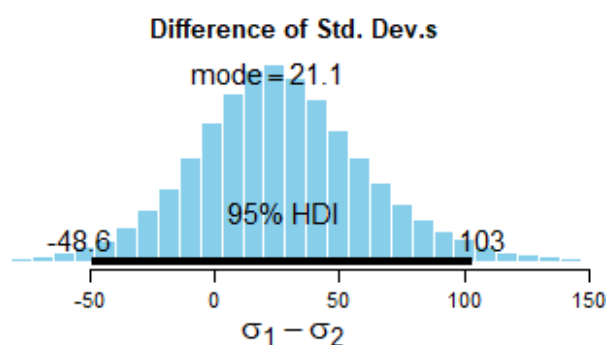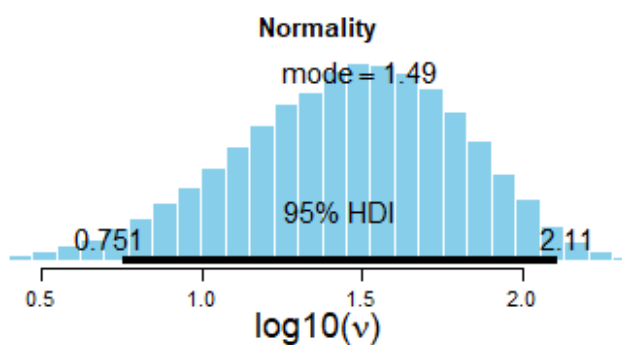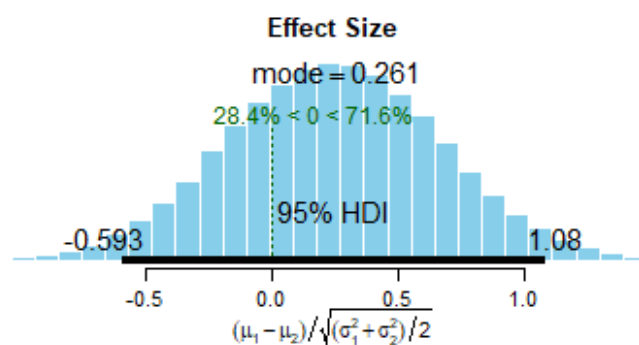

Group 1 = Test day 2  
Group 2: Test day 21

Time 1600 m in seconds

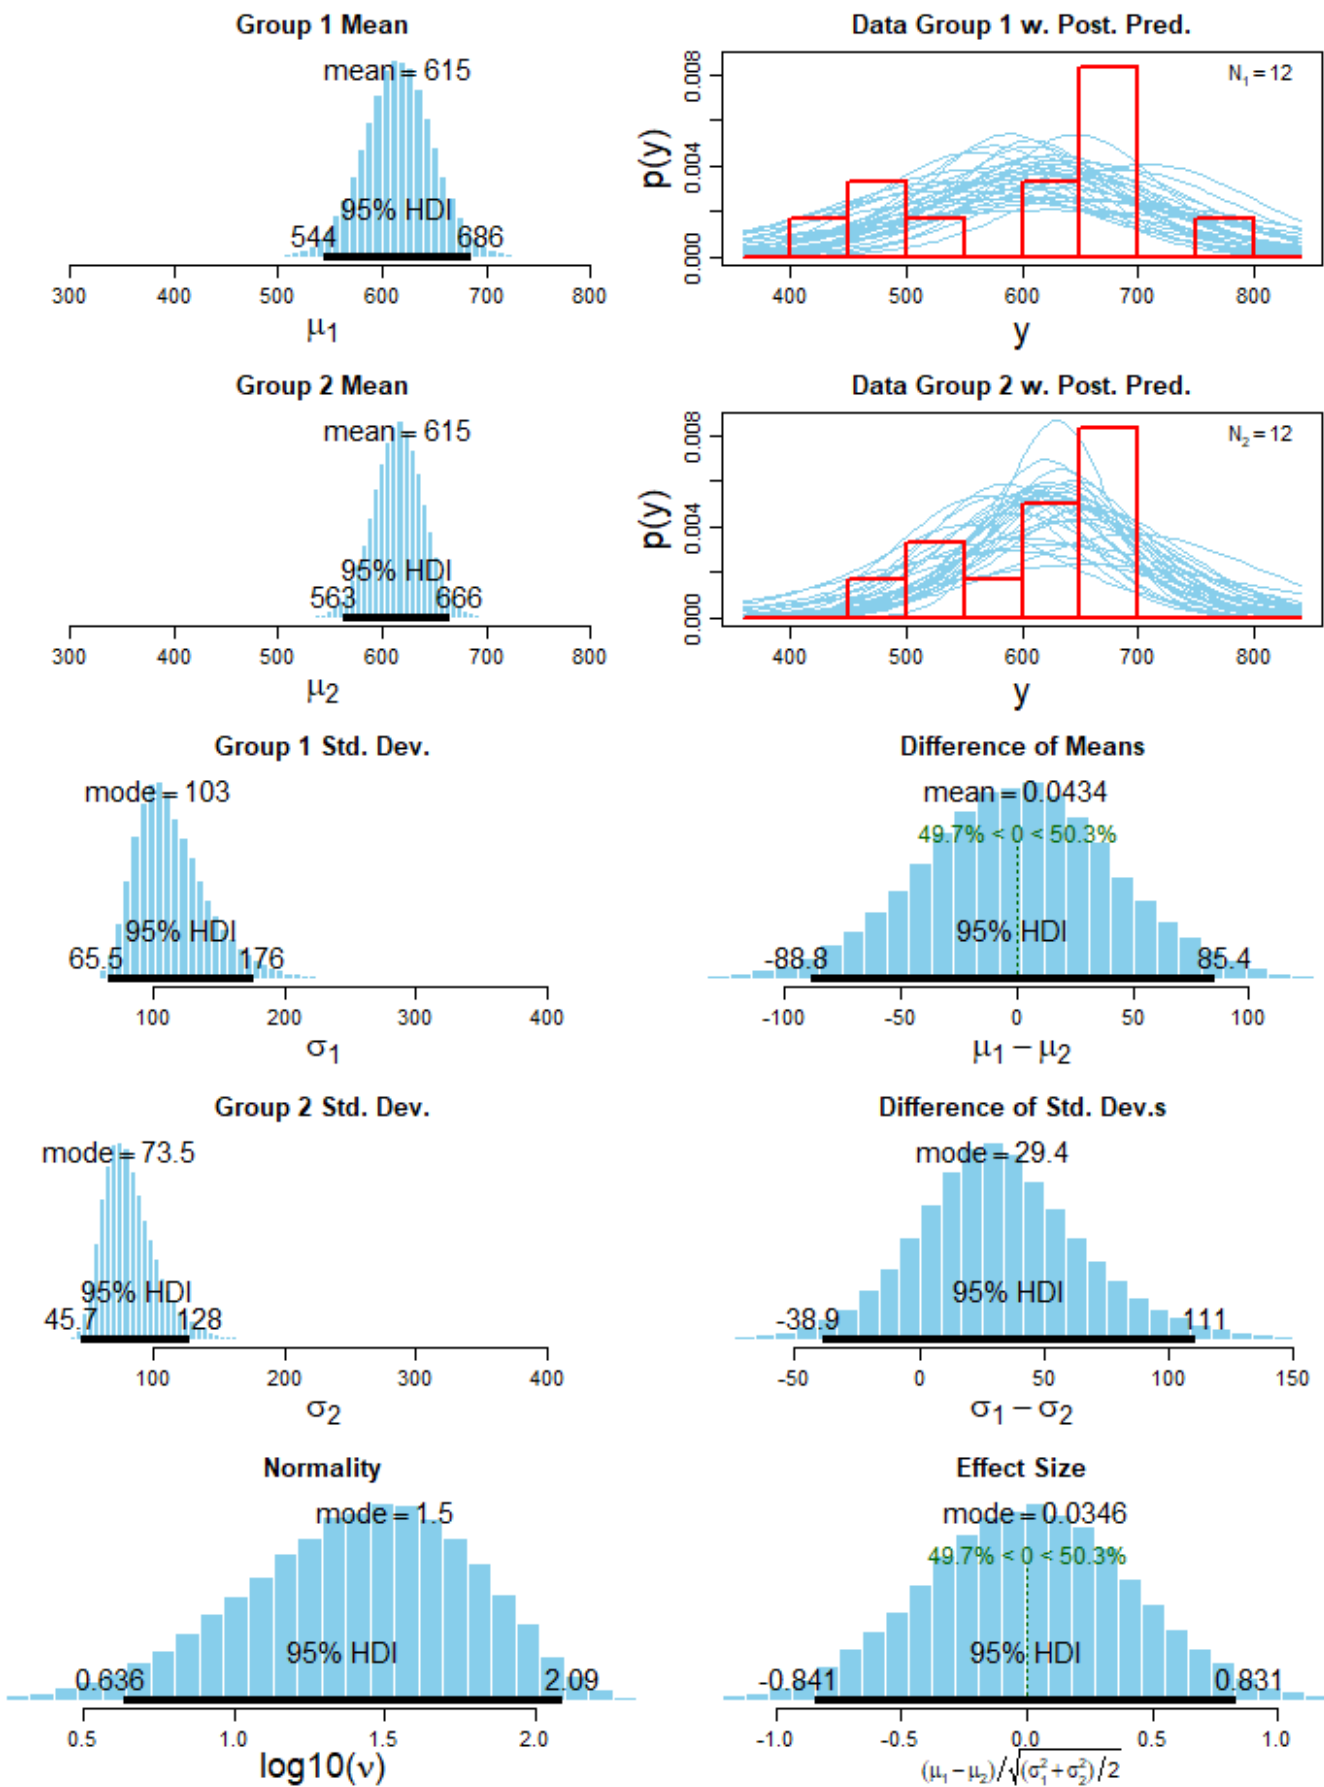

Group 1 = Test day 2  
Group 2: Test day 14

Time 1600 m in seconds

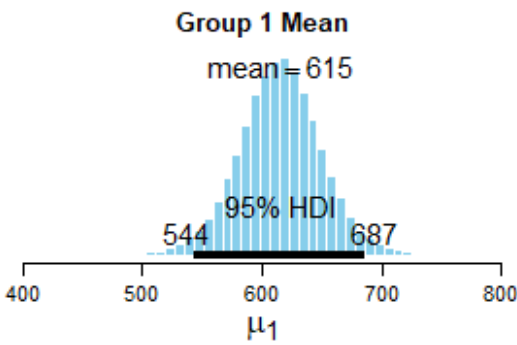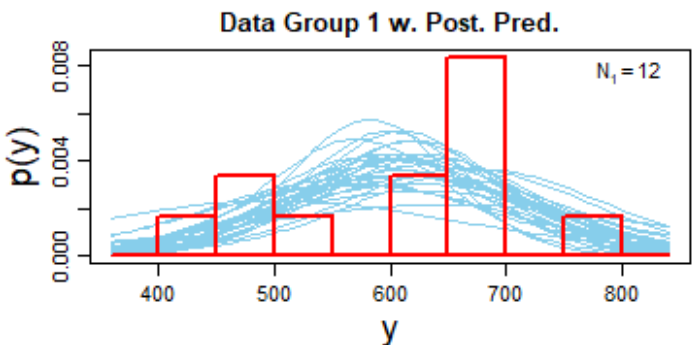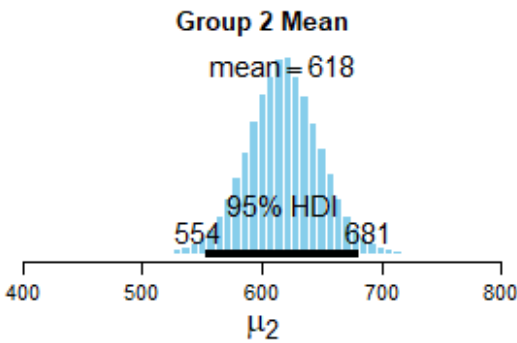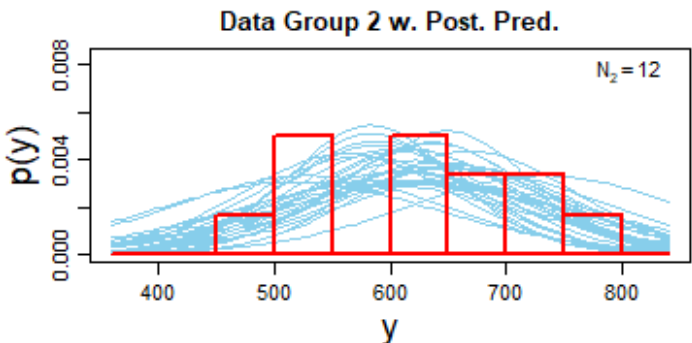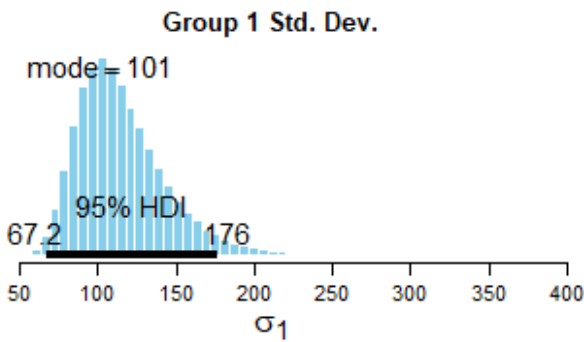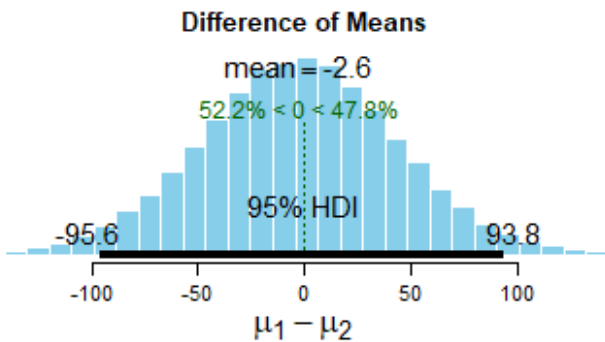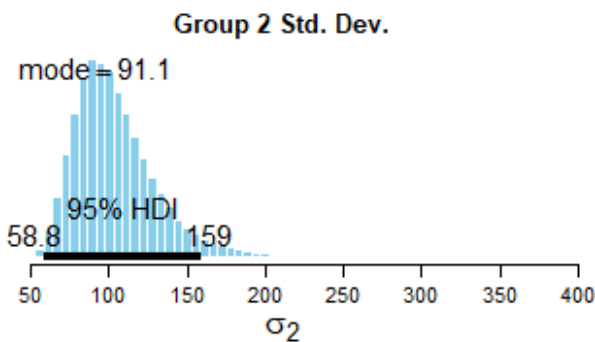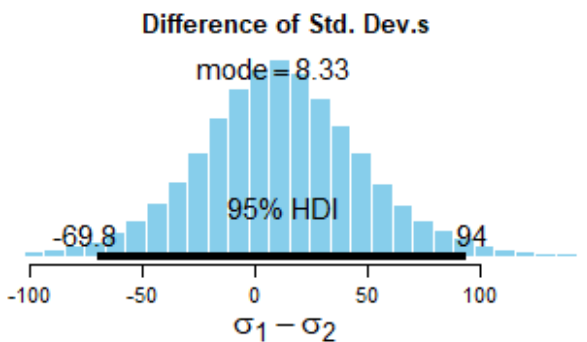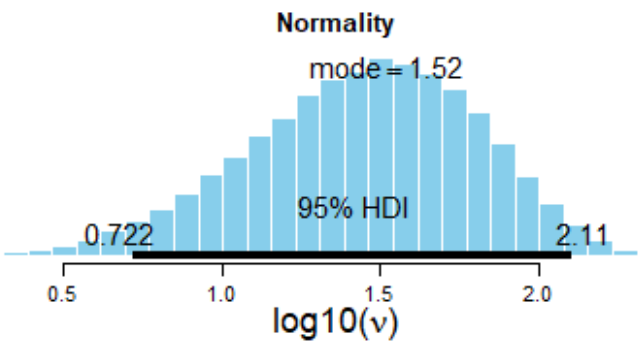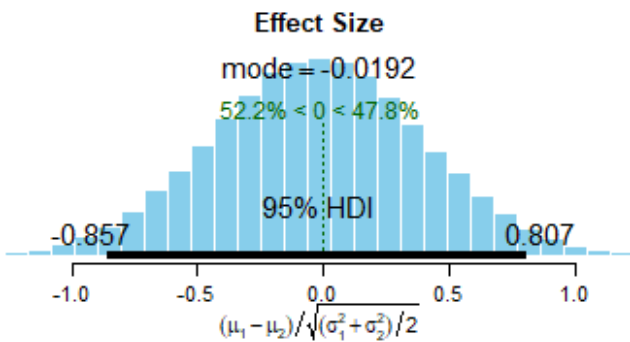

Group 1 = Test day 14  
Group 2: Test day 21

Time 1600 m in seconds

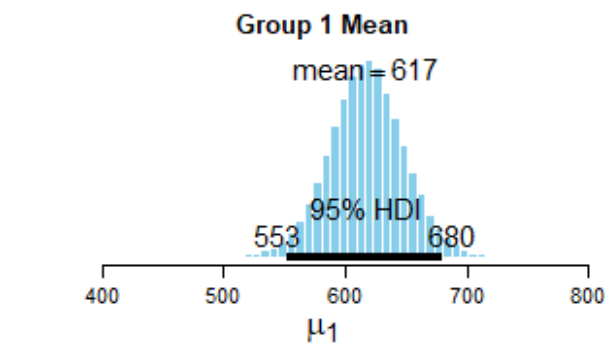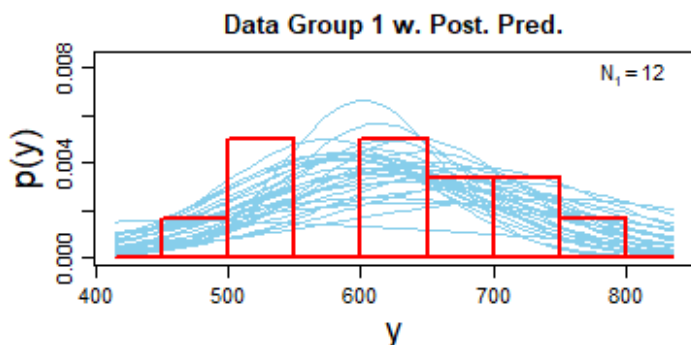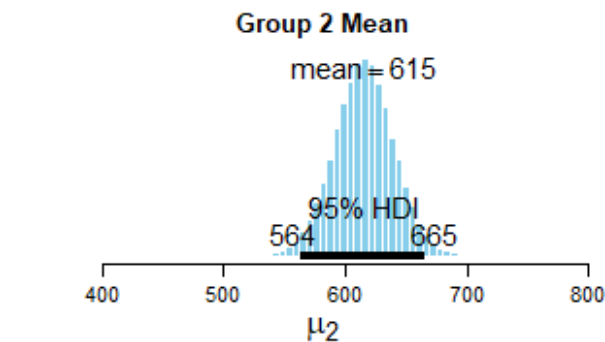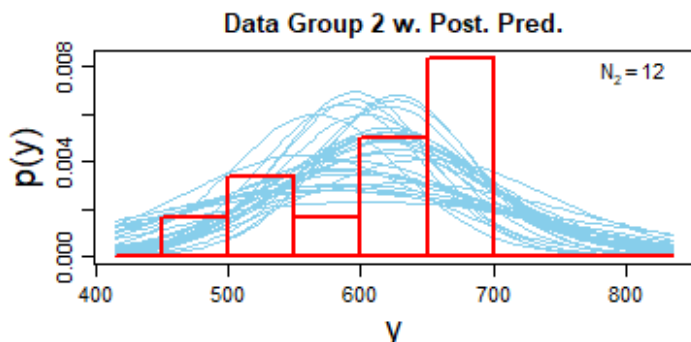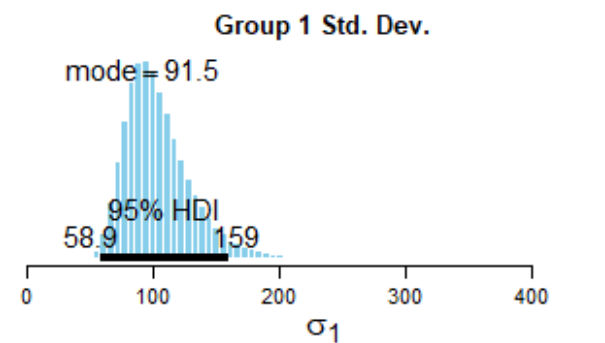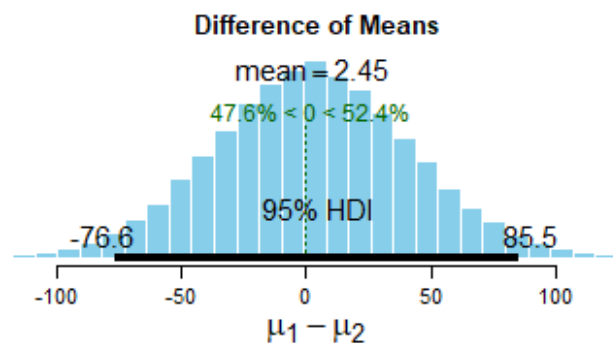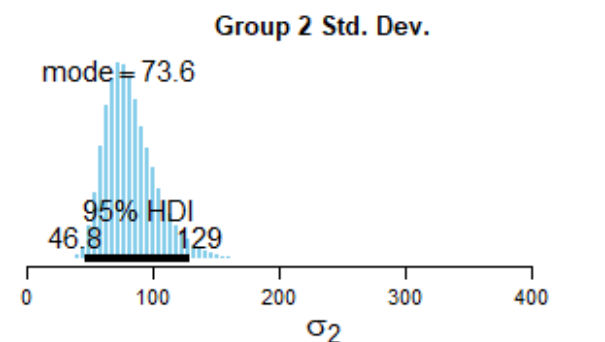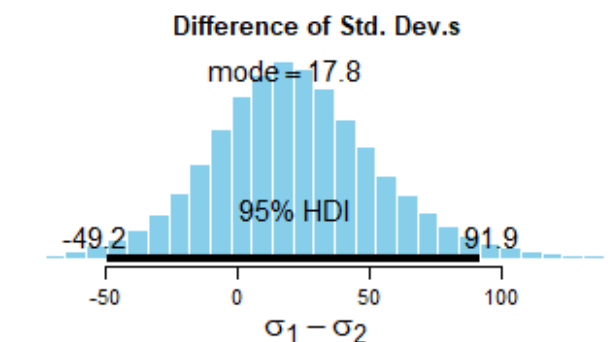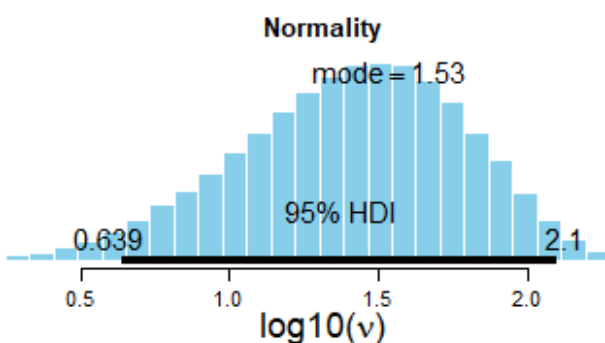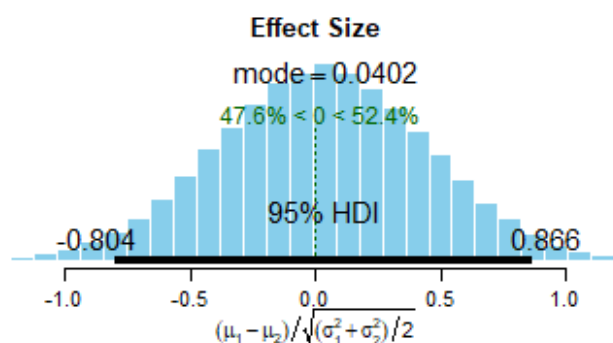

Supplement: s1 [file s1]
